# Supplementary material for: Pan-transcriptomic analysis identified common differentially expressed genes of Acinetobacter baumannii in response to polymyxin treatments
Source: Royal Society of Chemistry journal article supplement (doi:10.1039/d0mo00015a), 2020-05-22
Supplement: d0mo00015a1.xlsx [file d0mo00015a1.xlsx]

## Sheet: Table S1
Table S1. 84 complete genomes from GenBank
Strain	Assembly	Size (Mb)	GC%	Scaffolds
ACICU	GCA_000018445.1	3.99676	38.9013	3
AB307-0294	GCA_000021145.1	3.76098	39	1
AB0057	GCA_000021245.2	4.06388	39.1897	2
AYE	GCA_000069245.1	4.04873	39.3357	5
D1279779	GCA_000186665.4	3.7117	38.9872	2
MDR-TJ	GCA_000187205.4	4.15341	39.0716	3
1656-2	GCA_000188215.1	4.02311	39.0831	3
MDR-ZJ06	GCA_000226275.1	4.01143	39.0425	2
TYTH-1	GCA_000302575.1	3.95737	39	1
BJAB07104	GCA_000419385.1	4.04223	38.9501	3
BJAB0715	GCA_000419405.1	4.05389	38.9193	2
BJAB0868	GCA_000419425.1	4.00582	38.9394	4
DU202	GCA_000498375.2	4.17896	39.3	1
ZW85-1	GCA_000505685.2	3.92525	39.2009	3
AC29	GCA_000695855.3	3.93513	38.9005	3
AB031	GCA_000746605.1	3.80332	39.2	1
AbH12O-A2	GCA_000761175.1	3.87577	39.1	1
LAC-4	GCA_000786735.1	3.96844	38.9863	3
6200	GCA_000814345.1	4.07398	39.1818	4
NCGM 237	GCA_000828795.1	4.02192	39.1	1
IOMTU 433	GCA_000828935.1	4.19032	39.1181	2
A1	GCA_000830055.1	3.91774	39.2891	2
ORAB01	GCA_000939415.2	4.12162	39.1426	4
AB5075-UW	GCA_000963815.1	4.06698	39.0467	4
XH386	GCA_001026965.1	4.1995	39.1641	2
B8342	GCA_001077555.2	3.94783	39.1	1
Ab04-mff	GCA_001077655.1	4.19228	38.9197	3
ATCC 17978-mff	GCA_001077675.1	4.0067	38.9442	2
B8300	GCA_001077965.2	3.85006	39.2739	2
R2090	GCA_001261895.2	3.81916	39	1
D36	GCA_001399655.1	4.13116	39.0206	5
CIP70.10	GCA_001457535.1	3.93626	38.8974	2
KBN10P02143	GCA_001514375.1	4.1394	39.0657	2
R2091	GCA_001517645.1	3.94749	38.9973	2
YU-R612	GCA_001543995.1	4.15525	38.9946	3
XH860	GCA_001573065.1	3.84662	39	1
XH859	GCA_001573085.1	3.97707	39.1	1
XH857	GCA_001573105.1	3.87964	39	1
XH856	GCA_001573125.1	3.9084	39.1	1
XH858	GCA_001578145.1	4.17261	38.9	1
ATCC 17978	GCA_001593425.2	4.00479	39	1
3207	GCA_001636235.1	4.09204	38.9868	3
KAB01	GCA_001806345.1	4.03409	38.9034	2
KAB02	GCA_001806365.1	4.0862	38.9927	2
KAB03	GCA_001806385.1	4.05696	38.9035	2
KAB04	GCA_001806405.1	4.12812	38.9646	2
KAB05	GCA_001806425.1	4.0386	39.0017	2
KAB06	GCA_001806445.1	4.03871	39.0017	2
KAB07	GCA_001806465.1	4.05443	38.9987	2
KAB08	GCA_001806485.1	4.07517	38.8905	2
HRAB-85	GCA_001887305.1	4.09858	39.0054	2
AF-673	GCA_001895985.1	4.0931	39.0705	2
AF-401	GCA_001896005.1	4.26763	39.0881	2
XDR-BJ83	GCA_001902375.1	4.08062	38.912	2
LAC4	GCA_001908295.1	3.98869	38.9864	3
CMC-CR-MDR-Ab4	GCA_001922205.1	4.15601	38.9749	3
CMC-MDR-Ab59	GCA_001922225.1	4.07636	39.0708	2
CMC-CR-MDR-Ab66	GCA_001922245.1	4.17416	38.9762	3
AB042	GCA_001941765.1	4.00472	39	1
JBA13	GCA_002082625.1	4.06698	39.0003	3
CBA7	GCA_002082645.1	4.10845	39.1682	2
15A34	GCA_002082685.1	3.93873	38.9957	2
15A5	GCA_002082705.1	4.04931	38.8893	3
USA2	GCA_002082725.1	3.9876	38.8976	2
SSA6	GCA_002082745.1	3.88441	39	1
HWBA8	GCA_002082785.1	4.27355	39.0596	2
WKA02	GCA_002082805.1	3.87094	38.9	1
USA15	GCA_002082825.1	4.02848	39.078	2
SAA14	GCA_002082845.1	3.97256	39.1	1
SSA12	GCA_002082865.1	4.06472	38.9872	3
SSMA17	GCA_002082885.1	4.02318	38.9937	2
ab736	GCA_002116925.1	3.99043	39.1892	2
A85	GCA_002210065.1	4.14461	39.1765	6
A1296	GCA_002504145.1	3.8107	39.1851	3
A388	GCA_002741415.1	4.03205	39.2869	2
AbPK1	GCA_002753915.1	4.14734	38.9862	3
AYP-A2	GCA_002761575.1	4.1027	39.2649	2
Ab4977	GCA_002762095.1	3.96691	39.1	1
Ab4568	GCA_002762115.1	4.00045	39.1	1
Ab4653	GCA_002762155.1	3.91393	39.2	1
BAL062	GCA_900088705.1	4.05077	39.0925	2
TCDC-AB0715	GCA_000189735.2	4.21801	38.8947	3
AC30	GCA_000307975.2	3.92286	38.8212	4
AB34299	GCA_002009115.1	3.98304	38.8603	3

## Sheet: Table S2
Table S2. 41 DEGs uniquely identified by FDR <0.05 and FC ≥1.5
		DEG*					FC (log2)
Gene	Annotation	34654	1207552	1428368	1457504	ATCC 19606	34654	1207552	1428368	1457504	ATCC 19606
G1020	tonB-dependent siderophore receptor family protein	-1	-1	-1	-1	-1	-1.05313	-1.59269	-2.63612	-2.42598	-0.753343
G1231	hypothetical protein	1	1	1	1	1	2.09138	2.169	2.14584	1.72668	1.0986
G1289	hypothetical protein	-1	-1	-1	-1	-1	-2.27339	-3.21848	-2.78469	-1.30197	-2.18052
G1328	mycolic acid cyclopropane synthetase family protein	1	-1	-1	1	-1	2.57876	-0.77524	-1.17426	3.02586	-1.74387
add	adenosine deaminase	1	1	1	1	1	2.52852	0.871522	0.851882	2.56786	1.58568
G1401	hypothetical protein	1	1	1	1	1	2.93784	2.47266	1.65431	1.35666	0.903625
G1718	alpha/beta hydrolase family protein	1	1	1	1	1	2.46288	1.44362	0.854032	1.50225	0.930318
G1833	hypothetical protein	1	1	1	1	1	2.62739	0.729854	0.788199	1.76742	1.14749
G1920	hypothetical protein	1	1	1	1	1	2.56848	1.32938	0.695115	2.396	3.15105
G2078	MATE efflux family protein	1	1	1	1	1	2.53707	1.41806	0.73702	1.80017	1.5789
G310	repair family protein	1	1	1	1	1	1.09731	1.05796	0.969026	1.3123	2.01997
G4028	hypothetical protein	1	1	1	1	1	1.86613	2.42387	2.085	2.22384	0.868811
cah	carbonic anhydrase family protein	-1	-1	-1	-1	-1	-2.31116	-0.871825	-2.03525	-1.47325	-0.810183
trpA	tryptophan synthase, alpha subunit	-1	-1	-1	-1	-1	-0.971761	-1.61976	-1.2002	-1.25172	-0.987384
G4259	glycine zipper family protein	1	1	1	1	1	2.9834	3.96578	3.90086	1.92242	6.81575
G4273	hypothetical protein	1	1	1	1	-1	2.32012	0.609037	0.813461	2.3707	-1.13485
G4305	hypothetical protein	1	1	1	1	1	2.02384	1.34797	1.59126	1.45599	2.04524
rpmE	ribosomal protein L31	1	1	1	1	1	2.96298	1.04718	0.94114	1.80136	0.959493
infA	translation initiation factor IF-1	-1	-1	-1	-1	-1	-2.61227	-1.30343	-1.11442	-2.37778	-0.821999
G4546	3-demethylubiquinone-9 3-methyltransferase family protein	1	1	1	1	1	2.01726	1.53098	0.97107	2.6167	1.80708
G4614	hypothetical protein	1	1	1	1	1	1.54903	4.47344	0.882605	3.27297	2.32056
G4793	response regulator	1	1	1	1	1	2.90569	0.658412	0.99746	2.14074	2.121
G4882	aldehyde dehydrogenase family protein	-1	-1	-1	-1	-1	-1.07106	-1.2756	-1.69196	-1.44183	-0.725064
fabB	beta-ketoacyl synthase, C-terminal domain protein	-1	-1	-1	-1	-1	-1.95698	-1.52417	-2.05684	-1.50011	-1.29138
G5148	patatin-like phospholipase family protein	1	1	1	1	1	1.16041	0.823088	0.897345	1.74249	2.13376
arcD	transporter, basic amino acid/polyamine antiporter family protein	-1	-1	-1	-1	-1	-2.77388	-0.746648	-1.89414	-1.65162	-1.75769
G5341	hypothetical protein	1	1	1	1	1	2.89241	1.61803	0.789282	2.59103	2.37479
rplM	ribosomal protein L13	-1	-1	-1	-1	-1	-2.58247	-1.01804	-1.28322	-1.38255	-0.648209
G5462	tonB-dependent siderophore receptor family protein	-1	-1	-1	-1	-1	-2.38542	-1.11677	-1.73061	-1.63646	-0.929979
acnA	aconitate hydratase 1	1	1	1	1	1	3.19315	2.43677	0.630889	1.98922	2.38341
G5516	short chain dehydrogenase family protein	1	1	1	1	1	1.69921	2.53315	0.837986	1.18485	2.435
G5564	methyltransferase domain protein	1	1	1	1	1	3.14856	2.05673	0.963125	3.25692	1.78934
G5632	dnaJ C terminal domain protein	1	1	1	1	1	1.79862	1.2017	0.752378	2.03241	1.45705
G5638	hypothetical protein	1	1	1	1	1	1.52953	1.75892	1.82761	1.53103	1.04409
G5650	thioredoxin family protein	1	1	1	1	1	1.71895	1.15562	0.937778	1.96599	1.60674
nadC	nicotinate-nucleotide diphosphorylase	1	1	1	1	1	1.7685	1.55722	0.771859	3.69533	2.03923
G5830	hypothetical protein	1	1	1	1	1	2.24384	1.923	0.925374	2.73342	1.25378
G5849	pspC domain protein	1	1	1	1	1	2.11585	0.977343	1.03016	2.57259	0.926013
G5874	sel1 repeat family protein	1	1	1	1	1	2.6915	1.61138	1.64405	2.34554	0.987578
bioB	biotin synthase	-1	-1	-1	-1	-1	-2.48017	-1.1726	-2.08952	-1.43617	-1.41308
G946	hypothetical protein	1	1	1	1	1	3.23125	3.79518	0.826514	4.20109	3.03048

## Sheet: Table S3
Table S3. 2,822 core genes and fold changes in their expression after polymyxin treatment
		DEG*					FC (log2)
Gene	Annotation	34654	1207552	1428368	1457504	ATCC 19606	34654	1207552	1428368	1457504	ATCC 19606
G1001	hypothetical protein	0	0	0	0	0	-0.719393	-0.561733	0.00128398	-0.480652	-0.403815
G1002	SMP-30/Gluconolaconase/LRE-like region family protein	0	0	0	0	-1	-0.185342	-0.240944	-0.451918	0.534741	-1.33022
G1004	bacterial regulatory s, gntR family protein	0	0	0	0	0	-0.0852488	-0.273909	0.235389	-0.419274	-0.182369
G1005	sugar (and other) transporter family protein	0	0	0	0	0	-0.369646	-0.302644	-0.409896	-0.0436557	-0.2293
zur	ferric uptake regulator family protein	0	0	0	0	0	-0.899553	-0.781067	-0.551831	-0.254654	-0.140529
G1008	fecCD transport family protein	0	0	0	0	0	-0.226615	0.382513	0.188601	0.177279	-0.559629
G1012	hypothetical protein	0	0	0	0	0	-0.00410341	-0.59217	-0.19182	-0.224494	-0.420217
argO	lysE type translocator family protein	-1	0	0	0	0	-1.25412	-0.330311	-0.958147	0.595179	-0.848351
G1020	tonB-dependent siderophore receptor family protein	0	-1	-1	-1	0	-1.05313	-1.59269	-2.63612	-2.42598	-0.753343
G1022	diguanylate cyclase domain protein	-1	0	0	0	0	-1.46007	-0.144032	-0.632884	-0.908252	0.0152867
G1026	hypothetical protein	-1	0	0	0	0	-1.156	-0.24959	-0.588211	-0.194552	-0.375828
G1029	phospholipase A1 family protein	0	0	0	0	0	-0.755712	0.000389875	0.313266	0.118561	-0.230162
G1034	dienelactone hydrolase family protein	0	0	0	0	0	0.187789	0.277724	-0.484746	-0.229616	0.564411
eutC	ethanolamine ammonia-lyase light chain family protein	0	0	0	0	0	0.941348	0.84799	-0.0274009	0.967731	-0.455456
G1045	short chain dehydrogenase family protein	1	0	0	0	0	1.45769	0.222596	0.417878	0.62727	0.535635
G1046	mechanosensitive ion channel family protein	0	1	0	0	1	0.209348	1.02411	-0.0313977	1.17579	2.47838
G1048	alpha/beta hydrolase family protein	0	0	0	0	1	0.206597	0.994209	0.263802	0.0315265	1.07011
dnaE	DNA polymerase III, alpha subunit	0	0	0	0	0	-0.197269	-0.0602176	-0.13628	0.0126509	0.0249255
hYR	ahpC/TSA family protein	0	0	0	0	1	0.921061	0.202325	-0.247509	0.249547	1.00468
G1061	hypothetical protein	0	0	0	0	0	0.697207	0.357689	0.419402	1.06194	-0.212993
benA	benzoate 1,2-dioxygenase, large subunit	0	0	0	0	0	0.323565	-0.169997	-0.287066	0.210262	-0.439527
G1071	yjeF-related family protein	0	0	0	0	0	-0.186346	-0.235717	-0.401427	-0.471004	0.417069
blaOXA-33	beta-lactamase	-1	0	0	0	1	-1.7029	0.38438	0.422411	-0.448862	1.19268
G1077	asnC family protein	0	0	0	0	0	-0.680625	-0.170701	-0.0867924	0.406032	-0.42766
G1078	hypothetical protein	0	0	0	0	0	0.304413	-0.195122	-0.277476	0.0441097	-1.45425
G1080	gram-negative pili assembly chaperone, C-terminal domain protein	0	0	0	0	-1	0.457944	0.503634	-0.524154	0.649521	-2.38285
G1083	hypothetical protein	-1	0	-1	0	-1	-2.72177	-0.934569	-1.36702	-0.647726	-3.40969
G1084	hypothetical protein	0	0	-1	1	1	-0.885821	-0.194174	-1.70925	2.66302	2.59423
argA	amino-acid N-acetyltransferase	1	1	1	0	1	2.53947	1.38725	1.55473	1.46338	3.01669
ileS	isoleucine--tRNA ligase	0	0	0	0	0	-0.306288	-0.498755	-0.0678646	-0.693986	-0.0952218
arsC	arsenate reductase	0	-1	0	0	0	0.2631	-1.09418	0.726063	-0.694935	0.661467
raiA	ribosomal subunit interface protein	0	0	1	0	1	1.63179	0.676198	1.22673	0.527878	1.00751
secE	preprotein translocase, SecE subunit	0	0	0	0	0	-1.22012	-0.202478	-0.0746073	-0.792451	-0.893423
G1112	pyridine nucleotide-disulfide oxidoreductase family protein	0	0	0	0	0	-1.07103	0.223794	-0.893379	0.376307	-0.0449808
G1113	hypothetical protein	0	0	0	0	-1	-0.543371	-0.581046	-0.416458	-0.551946	-1.12275
G1116	glucose / Sorbosone dehydrogenase family protein	1	0	0	0	1	1.24623	0.987338	0.517953	0.7042	1.12157
G1130	hypothetical protein	0	0	0	0	0	-0.282653	0.291519	-0.388847	0.131137	-0.11293
pgaA	poly-beta-1,6 N-acetyl-D-glucosamine export porin PgaA	1	1	1	1	1	1.47496	1.17328	1.67581	3.75922	3.96323
G1135	bacterial regulatory helix-turn-helix , lysR family protein	0	0	0	0	0	0.418455	0.203842	0.152801	0.691763	-0.163308
prfC	peptide chain release factor 3	0	0	0	0	0	-0.72122	-0.430075	0.162135	-0.768067	0.139488
yeeF	inner membrane transport protein YeeF	-1	0	0	0	0	-1.722	0.28579	-0.275981	-0.939107	-0.793911
G1145	endoribonuclease L-PSP family protein	0	0	0	0	0	0.603236	-0.232397	0.0382006	0.723796	-0.149711
G1146	tatD related DNase family protein	1	0	0	0	1	1.26181	0.678865	0.614914	0.563338	1.08114
G1147	hypothetical protein	0	0	0	0	1	0.872792	0.386027	0.0224048	0.738727	1.3527
fabI	enoyl-[acyl-carrier-protein] reductase [NADH] FabI	-1	-1	-1	-1	-1	-2.89617	-2.03102	-2.45927	-2.35238	-1.4886
orn	oligoribonuclease	-1	-1	-1	0	0	-2.09298	-1.12121	-1.57438	-1.07872	-0.287628
G1150	rhodanese-like domain protein	0	0	0	0	0	0.385447	0.275479	0.78441	0.10847	0.0841788
G1152	hypothetical protein	0	0	0	0	0	-0.730487	-0.639782	-0.347912	-0.76225	-0.569477
hisS	histidine--tRNA ligase	0	0	0	0	0	-0.422404	-0.431034	0.000735275	-0.791584	-0.361604
pilF	type IV pilus biogenesis/stability protein PilW	0	0	0	0	0	-0.545232	-0.479018	-0.110141	-0.0412863	-0.472513
G1155	carbohydrate kinase, thermoresistant glucokinase family protein	0	0	0	0	0	-0.542789	0.230804	0.242359	0.312736	-0.534328
ackA	acetate kinase	1	0	1	1	0	2.22864	-0.470564	1.43823	3.20488	0.223381
G1157	hydrolyase, tartrate alpha subunit/fumarate, Fe-S type domain protein	0	0	0	0	0	-1.15661	-0.30849	-0.205669	-1.03004	0.254912
G1158	tonB-dependent siderophore receptor family protein	-1	-1	0	-1	0	-3.23187	-1.81976	0.678899	-3.34535	-0.269725
metW	methionine biosynthesis protein MetW	0	0	0	0	0	-0.0167738	-0.727611	-0.197071	-0.975522	0.136793
G1160	sel1 repeat family protein	0	0	0	0	0	-0.377667	0.796735	0.0739504	-1.27797	0.182767
rdgB	non-canonical purine NTP pyrophosphatase, RdgB/HAM1 family	0	0	0	0	0	-0.505139	-0.766772	-0.106585	-0.400776	-0.339892
G1162	NRDE family protein	0	0	0	0	0	-0.189609	0.1357	-0.202778	0.16124	-0.36463
lgt	prolipoprotein diacylglyceryl transferase	0	0	0	0	0	-0.00945036	0.0533848	-0.240153	0.263135	0.985044
G1164	hypothetical protein	0	0	0	0	0	0.258658	-0.72267	0.321316	-0.0440375	-0.491015
purU	formyltetrahydrofolate deformylase	0	0	0	-1	0	-0.447488	-0.822078	0.298168	-1.5182	-0.542389
G1166	transcriptional regulator, TetR family	0	0	0	0	0	-0.497207	-0.431322	-0.515125	-0.981963	-0.119813
G1167	hypothetical protein	0	0	0	0	0	0.313232	-0.286781	-0.203089	0.209186	0.148784
G1168	putative aSCH domain-containing protein	0	0	0	0	0	0.215827	-0.248614	-0.0100565	-0.159714	-0.423119
G1169	RNA recognition motif family protein	0	0	0	0	0	-0.504201	-0.685242	-0.222653	-0.34578	-0.323116
G1170	uvrD/REP helicase N-terminal domain protein	0	0	0	0	0	0.0815765	0.147927	-0.0295031	0.167516	0.334627
G1171	zinc-binding alcohol dehydrogenase family protein	0	0	0	0	0	0.286267	0.234196	-0.103143	0.241118	0.0642625
G1172	lipid A biosynthesis lauroyl (or palmitoleoyl) acyltransferase family protein	-1	0	-1	0	0	-1.32687	-0.313188	-1.18932	-0.259961	-0.354236
G1173	glycosyl transferases group 1 family protein	0	0	0	0	0	0.257029	-0.352876	-0.386254	0.298406	-0.220107
G1174	endonuclease/Exonuclease/phosphatase family protein	0	0	0	0	1	0.870033	0.57594	0.733798	0.907128	1.21173
G1175	hypothetical protein	0	0	-1	-1	0	-1.06107	-0.535022	-1.07758	-1.91811	-0.53728
G1176	hypothetical protein	0	0	0	0	0	-0.747978	0.483367	-0.128759	0.842907	-0.734627
G1177	hypothetical protein	0	0	0	0	0	-0.182294	-0.21058	0.175369	-0.154156	0.116829
leuC	3-isopropylmalate dehydratase, large subunit	0	0	0	0	0	0.66839	0.34816	0.700339	-0.0433061	-0.0912199
G1179	putative transmembrane protein	0	0	0	0	0	-0.7299	0.15342	-0.285011	-0.0406848	-0.507353
G1180	eamA-like transporter family protein	0	0	0	0	0	0.151054	0.56515	0.0273295	0.516207	0.36935
G1181	MATE efflux family protein	0	0	0	0	0	-0.122932	0.529925	-0.281271	0.2442	0.247628
G1182	sulfur acquisition oxidoreductase, SfnB family	0	0	0	0	0	0.480357	0.981659	0.288215	0.416671	0.308853
crcB	crcB-like family protein	0	0	0	0	0	-0.465821	-0.2768	-0.466029	0.264457	-0.960904
G1184	flavo, HI0933 family protein	0	0	0	0	0	-0.828865	-0.69914	-0.0565234	-0.813024	-0.625001
hemH	ferrochelatase	0	0	0	0	0	-0.267913	0.395796	-0.368065	-0.324464	-0.13902
G1186	sirA-like family protein	-1	0	0	0	0	-2.21427	-0.0653779	-0.818287	-0.981964	0.0959019
gspG	type II secretion system protein G	0	0	0	0	0	-0.628829	0.291127	-0.244906	-0.540337	0.34826
G1188	proton antiporter-2 family protein	0	0	0	0	0	-0.0341415	0.60043	0.209003	0.365247	-0.253076
ubiE	ubiquinone/menaquinone biosynthesis methyltransferase ubiE domain protein	0	0	0	0	0	0.543684	0.175703	0.298508	-0.156622	0.136597
G1190	FAD binding domain protein	0	0	0	0	0	0.269039	0.0765414	-0.1748	0.105095	-0.0905879
tapD	type IV leader peptidase family protein	0	0	0	-1	0	-0.760252	-0.0434906	-0.63932	-2.24031	-0.525334
G1192	hypothetical protein	0	0	0	0	0	-0.135283	-0.584379	-0.156902	0.311612	-0.350365
G1193	methylated-DNA-[]-cysteine S-methyltransferase family protein	0	0	0	0	0	0.160102	-0.0770416	0.0185736	0.49908	-0.6045
pgsA	CDP-diacylglycerol--glycerol-3-phosphate 3-phosphatidyltransferase	0	0	0	0	0	0.0576274	0.308141	-0.178066	-0.424274	0.394122
uvrC	excinuclease ABC subunit C	0	0	0	0	0	0.93985	0.361758	0.566938	0.479905	0.617398
G1196	aspartyl/Asparaginyl beta-hydroxylase family protein	-1	0	0	-1	0	-1.28526	0.238328	-0.217135	-1.66682	-0.160212
G1198	serine hydrolase family protein	0	0	0	0	1	1.15966	0.681469	-0.470246	1.11892	1.32367
G1199	DSBA-like thioredoxin domain protein	1	0	0	0	0	1.21145	0.203058	0.0495902	0.327466	0.677684
G1200	putative selenocysteine synthase	0	0	0	1	1	0.284665	0.502427	-0.613494	1.59576	1.73198
G1201	putative translation elongation factor P	0	0	0	0	0	-0.193542	0.0584068	0.695946	0.184821	0.900417
G1202	putative metalloprotease	0	0	0	0	0	0.00931588	-0.213401	-0.15134	0.598157	-0.344125
atl1	alkyltransferase-like protein 1	0	0	0	0	0	0.101492	-0.244939	0.0547319	0.232767	-0.168319
G1204	hypothetical protein	0	0	0	0	0	-0.535797	0.0883897	0.516879	0.405843	-0.0912399
hflB	ATP-dependent metallopeptidase HflB family protein	0	0	0	0	0	0.815033	0.850542	0.785606	-0.015182	0.506539
G1206	hypothetical protein	-1	0	0	0	-1	-1.94434	-0.366739	-0.843848	-0.67514	-2.08118
G1207	hypothetical protein	0	0	0	0	-1	-1.26279	-0.689106	-0.93823	-0.105249	-1.98047
groS	10 kDa chaperonin	0	0	0	0	1	1.12814	-0.210387	0.45355	-1.2059	1.00668
G1209	metallo-beta-lactamase superfamily protein	0	0	0	0	0	-0.293432	0.0191485	-0.127755	-0.248734	-0.0384823
G1210	glycerophosphoryl diester phosphodiesterase family protein	0	0	0	0	0	0.455185	0.181194	-0.504718	0.620111	-0.770539
G1211	transglycosylase SLT domain protein	0	0	0	0	-1	-1.15275	-0.452809	-0.368564	-0.938734	-1.0294
G1212	bacterial extracellular solute-binding s, 3 family protein	1	1	1	0	1	4.38808	1.60668	2.21242	0.820956	1.78971
G1213	hypothetical protein	0	0	0	0	0	1.12951	-0.0384484	-0.182821	0.978548	-0.345167
G1216	short chain dehydrogenase family protein	0	0	0	0	0	0.390181	0.365397	0.366651	0.104439	0.822716
G1217	bacterial regulatory s, tetR family protein	0	0	0	0	0	-0.0892936	0.603183	-0.175203	0.443295	-0.459386
G1218	glycerate kinase family protein	0	0	0	0	0	0.101291	0.463696	-0.492718	-0.109153	0.331644
G1219	EF-P lysine aminoacylase GenX	0	0	0	0	0	-0.919888	0.203395	-0.181221	-0.204988	0.114657
G1220	amino acid permease family protein	0	0	0	0	0	0.456324	0.776841	0.878069	0.118018	0.035285
G1221	prokaryotic lipo-attachment site family protein	-1	0	0	0	0	-1.14264	0.0685238	-0.163362	-0.0361539	0.0592598
G1222	gtrA-like family protein	0	0	-1	0	0	0.763741	0.376041	-1.52967	0.20015	0.744959
G1223	ABC-2 type transporter family protein	0	0	0	0	0	0.55314	0.545007	-0.20631	0.318292	0.613164
G1224	ABC-2 transporter family protein	0	0	0	0	0	0.881789	0.891294	0.295111	0.397796	0.534548
serC	phosphoserine transaminase	0	0	0	0	0	-0.45003	-0.540766	-0.357377	-1.34567	0.409569
G1226	hypothetical protein	0	0	0	0	0	-1.01328	-0.63669	-0.66444	-0.256479	-0.579587
G1227	liporeleasing system, transmembrane , LolC/E family protein	1	1	1	0	1	2.76951	1.61419	1.56175	1.32479	2.23082
lolD	liporeleasing system, ATP-binding protein	1	1	1	0	1	2.60231	1.27508	1.70389	1.81172	2.14205
G1229	DNA internalization-related competence protein ComEC/Rec2	0	0	0	0	0	-0.548658	-0.12594	-0.346066	-0.670643	-0.857626
G1230	bacterial lipid A biosynthesis acyltransferase family protein	-1	0	0	0	0	-2.08066	-0.39381	-0.887265	-0.143726	-0.788724
G1231	hypothetical protein	1	1	1	0	1	2.09138	2.169	2.14584	1.72668	1.0986
G1232	RNA polymerase sigma factor, sigma-70 family protein	1	1	1	0	1	1.31945	1.24463	1.60324	1.06214	1.15119
pal	peptidoglycan-associated lipoprotein	0	0	0	0	1	0.176489	0.896687	-0.125002	0.868576	1.89992
tolA	protein TolA	0	0	0	0	1	0.716242	-0.213096	0.202649	0.74596	1.53926
ybgC	tol-pal system-associated acyl-CoA thioesterase	0	0	-1	0	0	-0.405191	-0.269747	-1.30046	-0.479161	0.322692
G1236	hypothetical protein	0	0	0	0	0	-0.330535	-0.328516	1.21719	1.0862	0.504991
G1237	cytidyltransferase-like domain protein	0	0	0	0	0	-0.192744	-0.060171	0.167739	-0.232873	-0.582238
cbl	bacterial regulatory helix-turn-helix , lysR family protein	0	0	0	0	0	0.24871	0.366482	0.229297	0.0699195	-0.386414
cysA	sulfate ABC transporter, ATP-binding family protein	0	0	0	0	0	0.0180039	0.218187	-0.298073	0.131532	-0.173844
G124	phage T7 tail fiber family protein	0	0	0	0	0	0.559376	-0.665059	-0.0560644	0.599881	-0.586189
cysW	sulfate ABC transporter, permease protein CysW	0	0	0	0	0	-0.376501	0.686428	0.556341	0.167465	-0.76192
mucD	peptidase Do family protein	1	1	0	0	1	1.29048	1.33083	0.338816	1.30323	2.8111
rnc	ribonuclease 3	0	0	0	0	0	-0.785064	-0.293401	0.0751729	-0.439329	-0.856721
G1243	hypothetical protein	0	0	0	0	0	-0.396034	0.202372	0.469176	-0.256398	-0.89491
sdh	short chain dehydrogenase family protein	0	0	0	0	0	-0.083323	-0.415881	0.104141	-0.0487478	-0.675333
G1245	hypothetical protein	0	0	0	0	-1	0.697213	0.805349	0.517182	1.16569	-1.27691
G1246	hypothetical protein	0	0	0	0	0	-0.0991944	-0.47788	0.0424473	-0.174752	0.283543
dusB	TIM-barrel , nifR3 family protein	0	0	0	0	0	-0.785675	0.159743	0.00295227	-0.393713	-0.00127501
G1248	hypothetical protein	0	0	0	0	1	1.07913	0.750341	0.267345	1.62863	1.23112
phrB	FAD binding domain of DNA photolyase family protein	0	0	0	0	0	-0.78193	-0.346798	-0.293629	-0.446855	-0.447016
slyD	FKBP-type peptidyl-prolyl cis-trans isomerase family protein	0	0	0	0	0	-0.0564606	-0.0413024	0.251528	-0.702121	0.274687
G1251	pseudouridine synthase family protein	0	0	0	0	0	-0.938824	-0.215527	0.130062	-0.378485	0.27634
G1252	major Facilitator Superfamily protein	0	0	-1	0	0	-0.399496	-0.801879	-1.43308	0.337039	-0.743112
G1253	bacterial regulatory helix-turn-helix , lysR family protein	0	0	0	0	0	-0.697303	-0.262584	-0.155218	-0.0513223	-0.199633
G1254	asnC family protein	0	0	0	0	0	0.177704	-0.402013	0.7634	1.29954	-0.744775
G1255	hypothetical protein	0	-1	0	-1	0	-0.262572	-1.058	-0.573207	-3.3886	-0.973155
cstA	carbon starvation CstA family protein	0	0	0	0	0	0.386375	0.476458	0.397377	0.23065	-0.10403
G1257	ribonuclease T2 family protein	1	1	0	0	1	1.31021	1.29979	0.487124	0.979622	1.05762
G1258	transglycosylase SLT domain protein	1	1	0	0	1	1.72146	1.73839	0.751527	1.3103	2.40142
G1259	tonB family C-terminal domain protein	0	0	0	-1	-1	-0.632518	-0.5193	-0.303539	-2.04855	-1.00342
G1260	hypothetical protein	0	0	0	0	0	0.788932	0.375679	0.267077	0.727945	0.30423
wrbA	quinone oxidoreductase, type IV	0	0	0	0	0	-0.755182	-0.243039	-0.709068	-0.122465	0.203872
yihY	yihY family inner membrane domain protein	0	0	0	0	0	0.30018	0.348014	-0.0746478	0.0993421	0.328927
G1263	bacterial regulatory helix-turn-helix s, AraC family protein	0	0	0	0	0	-0.430431	-0.512143	-0.476861	0.290059	-0.910008
G1264	nitroreductase family protein	0	-1	-1	0	-1	-0.529423	-1.01073	-1.10614	-0.0899944	-2.32624
G1265	hypothetical protein	0	0	0	0	0	0.155423	-0.158168	0.44011	-0.468745	0.481347
G1266	hypothetical protein	0	0	0	0	0	0.47183	0.418376	0.320988	-0.383368	-0.0741332
rrtA	rhombosortase	0	0	0	0	-1	-0.0920603	-0.266998	0.00497329	0.0893136	-1.89976
secY	preprotein translocase, SecY subunit	0	0	0	0	0	-0.942979	-0.214667	0.158166	-1.06516	0.13211
rplF	ribosomal protein L6	0	0	0	0	0	-0.903576	-0.19208	0.354525	-0.966923	-0.00230432
rpsS	ribosomal protein S19	0	0	0	0	0	-0.973862	-0.432525	0.0392105	-1.09043	0.201033
rpsJ	ribosomal protein S10	0	0	0	0	0	-1.26542	-0.372536	-0.248875	-1.02933	-0.151159
G1272	rrf2 family protein	0	0	0	0	0	-0.0680048	-0.593905	0.0444159	-0.123625	-0.338964
G1273	putative metal-dependent hydrolase family protein	0	0	0	0	0	-0.236334	0.0459178	-0.421274	-0.49647	0.420739
G1274	dicarboxylate symporter family protein	0	0	0	0	0	0.601548	0.346534	-0.256012	0.362758	0.438801
corA	magnesium transport protein CorA	0	0	0	0	0	-0.747817	-0.545693	-0.953944	-0.225071	0.581645
ttg2D	toluene tolerance, Ttg2 family protein	1	1	0	0	1	2.38298	1.05466	0.00699112	1.24589	3.24773
ttg	hypothetical protein	0	0	0	0	0	-0.0534948	-0.234876	0.00743632	-0.243445	0.164834
G128	hypothetical protein	0	0	0	0	0	-0.111342	-0.368139	-0.608947	-0.0751493	0.736838
G1280	hypothetical protein	1	0	0	0	-1	1.46238	-0.11612	-0.757821	2.13215	-1.10756
hemF	coproporphyrinogen III oxidase family protein	0	0	0	0	1	0.558893	0.642511	0.0557415	1.08899	1.36954
aroE	shikimate 5-dehydrogenase	0	0	0	0	0	0.128678	-0.126883	-0.473871	0.228054	-0.461708
G1283	4Fe-4S single cluster domain protein	0	0	0	0	0	-0.228977	-0.078151	-0.847274	-0.129643	-0.402273
G1287	subtilase family protein	1	0	0	1	0	2.46941	0.996564	0.690574	2.09401	0.878169
G1289	hypothetical protein	-1	-1	-1	0	-1	-2.27339	-3.21848	-2.78469	-1.30197	-2.18052
G1290	methyltransferase domain protein	1	0	0	0	1	1.57925	0.326071	0.508429	0.635725	1.02963
G1291	hypothetical protein	0	0	0	0	1	0.571639	0.213026	0.315603	0.472099	1.54524
G1292	putative secreted protein	1	1	1	1	1	3.67897	4.00546	2.87621	3.97939	3.82542
sodC	superoxide dismutase domain protein	0	0	0	0	1	1.04794	0.649578	-0.117711	1.07966	1.32199
G1294	hypothetical protein	1	1	0	0	1	1.81927	1.77579	0.382405	0.698508	1.34476
G1295	flavodoxin-like fold family protein	0	0	0	0	0	0.540259	-0.184677	0.394881	0.263244	-0.191101
G1296	putative quinol monooxygenase ygiN	0	0	0	0	0	0.529297	-0.382715	0.494609	0.473353	0.159909
G1297	hypothetical protein	0	1	0	0	1	-0.0635004	1.04712	-0.167737	1.52901	1.24855
G1298	BFD-like [2Fe-2S] binding domain protein	-1	0	-1	0	0	-1.38676	0.737217	-5.0278	-1.17844	-0.0181013
G1299	repair family protein	0	1	0	0	1	0.956056	1.19035	0.782278	1.50506	1.9082
aroK	shikimate kinase family protein	0	0	0	0	0	-1.07742	-0.0915121	-0.343702	0.0680498	-0.210381
pilQ	type IV pilus secretin PilQ family protein	0	0	0	-1	0	-0.628216	-0.323421	-0.497422	-2.39131	-0.857672
G1302	fimbrial assembly family protein	-1	0	0	-1	-1	-2.14191	-0.655283	-0.0697834	-3.3031	-1.99571
G1303	sulfate ABC transporter, sulfate-binding family protein	-1	0	-1	0	-1	-1.25796	-0.134842	-1.53162	-0.96201	-1.61163
G1304	hypothetical protein	-1	-1	-1	0	0	-2.76507	-1.37546	-2.2962	-1.36507	0.189514
G1306	putative cation efflux system protein	0	0	0	0	0	-0.850528	-0.637337	-0.403983	-0.118109	-0.246289
G1307	sel1 repeat family protein	0	0	0	0	0	-1.25095	-0.478067	0.42415	1.69582	-0.954862
G1308	heme ABC exporter, ATP-binding protein CcmA	0	0	0	0	0	-0.691486	-0.337092	0.252706	-1.13464	0.136989
G1309	hypothetical protein	0	0	0	0	0	-0.417286	-0.363686	0.09604	0.0572341	-0.44938
G1310	3'-5' exonuclease family protein	0	0	0	0	0	0.0613102	-0.448238	0.236376	-0.141752	-0.860827
G1311	helix-turn-helix family protein	0	0	0	0	0	-0.833827	-0.324112	-0.453384	-0.19997	-0.112229
G1312	eamA-like transporter family protein	0	0	0	0	0	-0.436623	-0.0262511	-0.493368	0.647739	-0.394571
G1314	putative membrane protein	0	0	0	0	1	0.658757	-0.456324	-0.673715	1.31531	1.23619
G1315	phosphotransferase enzyme family protein	0	0	0	0	0	-0.546233	-0.149931	-0.0775151	-0.811213	-0.0464018
G1316	hypothetical protein	0	0	0	0	0	-0.309495	0.382822	-0.506054	0.827616	0.482393
G1317	DNA/RNA non-specific endonuclease family protein	0	0	0	0	0	-0.473818	-0.925543	-0.425033	-0.862329	-0.400505
G1318	hypothetical protein	1	1	1	1	1	2.71647	2.45884	1.18369	4.44008	4.26467
G1319	hypothetical protein	0	0	0	0	0	-0.0575449	0.154642	0.215437	-0.0311313	-1.26469
G1320	putative restriction endonuclease PvuRts1I	0	0	0	0	0	-0.569533	-0.59797	-0.110091	-0.398795	-0.66678
G1321	hxlR-like helix-turn-helix family protein	0	0	0	0	0	-0.536437	-0.698324	-0.163014	0.0433415	-0.74087
G1323	bacterial regulatory s, tetR family protein	0	0	0	0	-1	-0.401704	-0.276221	-0.321554	0.248973	-1.92156
G1324	bacterial regulatory helix-turn-helix s, AraC family protein	0	0	0	0	0	0.0764297	-0.457473	0.300442	0.169058	0.0405574
G1325	hypothetical protein	0	0	0	0	0	0.393809	-0.0925852	0.15384	0.322418	0.237154
G1326	hypothetical protein	0	0	0	0	0	0.0683834	-0.106802	-0.040531	0.296029	0.269532
G1327	sugar (and other) transporter family protein	0	0	0	0	0	-0.0467709	0.538204	-0.938543	-0.431149	0.274392
G1328	mycolic acid cyclopropane synthetase family protein	1	0	-1	1	-1	2.57876	-0.77524	-1.17426	3.02586	-1.74387
G1329	outer membrane beta-barrel domain protein	0	0	0	0	0	-0.0488887	0.213202	0.194237	0.266305	-0.467625
yeaZ	tRNA threonylcarbamoyl adenosine modification protein YeaZ	0	0	0	0	0	-0.966434	-0.989043	-0.657481	-0.736642	-0.310533
G1331	copper-resistance , CopA family protein	0	0	1	0	0	0.157154	0.470679	1.00485	0.645436	-0.148432
G1332	copper resistance B family protein	0	0	0	0	0	0.214007	0.604006	0.954969	0.370663	-0.201773
G1333	cation efflux family protein	1	0	0	0	1	1.37586	0.373854	-0.257134	0.777211	1.41581
add	adenosine deaminase	1	0	0	1	1	2.52852	0.871522	0.851882	2.56786	1.58568
G1335	bacterial regulatory helix-turn-helix , lysR family protein	0	0	0	0	0	0.224522	-0.352535	0.246606	0.315868	-0.00154585
G1336	sugar (and other) transporter family protein	0	0	0	0	0	0.244513	-0.177951	-0.382046	0.251294	0.631086
G1337	citB domain protein	0	0	0	0	0	-0.275712	0.302782	-0.967373	0.37753	-0.137559
cobZ	pyridine nucleotide-disulfide oxidoreductase family protein	0	0	0	0	0	0.521845	0.159696	-0.205777	0.167293	-0.0450543
G1339	bacterial regulatory s, tetR family protein	0	0	0	0	0	0.861722	0.43239	-0.26304	0.906376	-2.13372
G1345	ribonucleotide reductase, small chain family protein	0	0	0	0	0	-0.433423	-0.110111	-0.190362	-0.234581	0.330086
G1346	NADH-ubiquinone/plastoquinone oxidoreductase, chain 3 family protein	0	0	0	0	0	-1.07624	0.212923	-0.273719	-0.146083	0.446026
nuoI	NADH-quinone oxidoreductase, chain I family protein	0	0	0	0	0	-0.526347	0.164901	0.452273	-0.419592	0.952899
G1348	'Cold-shock' DNA-binding domain protein	-1	0	0	0	0	-1.32221	-0.863251	-0.647902	-0.48843	-0.84383
G1349	flavo, HI0933 family protein	0	0	0	0	0	-0.333171	-0.253741	-0.277878	-0.129952	-0.449643
G1350	hypothetical protein	0	0	0	0	0	-0.513658	0.716237	0.141692	1.36412	0.175781
G1351	hypothetical protein	1	1	0	1	1	3.0139	1.51166	0.626607	2.47052	2.65208
G1352	cytochrome C assembly family protein	0	0	0	0	0	-0.465391	-0.499996	-0.912337	-0.583362	0.31038
G1353	major Facilitator Superfamily protein	0	0	0	0	1	-0.163814	0.206825	-0.12065	0.476229	1.33953
otsB	trehalose-phosphatase	1	1	1	1	0	2.09526	2.58601	1.126	1.77524	1.0578
bioC	methyltransferase domain protein	-1	-1	-1	0	-1	-1.17144	-1.17386	-1.6873	-1.04314	-1.25869
acpP	acyl carrier protein	-1	0	0	0	0	-2.04616	0.329811	-0.318614	-0.741935	-0.531889
G1357	GDYXXLXY family protein	0	0	-1	0	0	-0.690429	-0.965868	-1.48697	0.102647	-0.0612832
G1358	ribosomal L25p family protein	-1	0	0	0	0	-2.06914	-0.170295	-0.678491	-1.11562	-0.42346
lolB	outer membrane lipoprotein LolB	1	1	1	1	1	4.37507	2.74984	2.48335	2.72866	3.5166
G1360	tetratricopeptide repeat family protein	0	0	0	0	0	0.447794	0.199125	-0.0893704	0.836163	0.478756
coaD	pantetheine-phosphate adenylyltransferase	0	0	-1	0	0	-1.05203	-0.767876	-1.52002	-1.08042	0.178219
G1362	putative ferredoxin	-1	0	0	0	0	-1.33003	0.116995	-0.527336	-0.133836	0.0420078
dmlR	HTH-type transcriptional regulator DmlR	0	-1	0	0	0	-0.277949	-1.27381	-0.662005	0.340073	-0.704647
G1364	hypothetical protein	0	0	0	0	0	-0.138442	0.450899	-0.170817	0.581434	-0.600462
G1365	pirin family protein	0	0	0	0	0	-0.324895	0.644438	-0.880219	0.000299453	-0.572751
G1366	pepSY-associated TM helix family protein	0	0	-1	0	0	-0.814026	-0.235784	-1.55327	-0.384079	-0.193898
G1367	putative membrane protein	0	0	0	0	0	0.0371166	0.489506	-0.565976	0.156018	-0.268628
G1368	3-deoxy-7-phosphoheptulonate synthase	0	0	0	0	0	-0.449699	-0.0833009	0.0453582	-0.896187	-0.4188
cobP	cobinamide kinase / cobinamide phosphate guanyltransferase family protein	0	0	0	0	0	0.191615	-0.351851	0.461391	-0.31929	0.0333435
G1371	HAD hydrolase, IA, variant 3 family protein	1	0	0	0	0	2.24037	0.616996	0.826933	0.308331	0.559296
G1373	demethylmenaquinone methyltransferase family protein	0	0	0	0	0	-0.658653	-0.405836	-0.694403	-0.118057	-0.384692
G1374	fhuF 2Fe-2S C-terminal domain protein	0	0	0	0	-1	0.456429	0.235102	-0.0707522	0.568041	-1.3935
ybaK	cys-tRNA(Pro)/Cys-tRNA(Cys) deacylase ybaK	0	0	0	0	0	0.72265	-0.355392	0.882532	-0.678045	0.385214
G1376	hypothetical protein	1	0	0	0	1	1.89205	0.709179	0.717635	0.905673	1.91031
G1377	surA N-terminal domain protein	0	0	0	0	0	-0.270482	-0.303053	0.278074	-0.797063	-0.264508
G1378	poly family protein	0	0	1	0	0	1.14187	-0.628436	1.44035	0.563608	-0.4302
G1379	hypothetical protein	0	0	0	0	0	-0.965607	-0.133427	-0.671264	0.0377331	0.270365
G1381	biopolymer transport ExbD/TolR family protein	0	0	0	0	0	0.873763	0.72142	0.364736	1.2114	-0.0319397
G1382	biopolymer transport ExbD/TolR family protein	0	0	0	0	0	-0.361885	0.329588	-0.215623	0.831656	-0.144285
G1383	acetyltransferase family protein	0	0	0	0	0	-0.454817	-0.360771	-0.334987	0.280324	-1.01609
G1384	hypothetical protein	-1	0	0	0	0	-1.47317	-0.521028	-0.786677	-0.125456	-0.868972
pyrF	orotidine 5'-phosphate decarboxylase	0	0	0	0	0	-0.713712	-0.712612	0.0827285	-0.488323	-0.417659
rpsA	ribosomal protein S1	0	0	0	0	0	-0.448232	0.23532	0.847845	-0.786213	0.277437
G1387	cytidine and deoxycytidylate deaminase zinc-binding region family protein	0	1	0	0	0	0.995478	1.05263	0.803055	0.945543	0.6802
gspK	type II secretion system (T2SS), K family protein	0	0	0	0	0	0.0682292	-0.769546	-0.256237	-0.324501	-0.642177
gspJ	type II secretion system protein J	0	0	0	0	0	0.39673	-0.945511	-0.126759	-0.362152	-0.503163
G1390	bacterial regulatory s, tetR family protein	0	0	0	0	0	0.219735	-0.0690487	0.402175	-0.46182	-0.135067
lpxK	tetraacyldisaccharide 4'-kinase	0	0	0	0	0	0.251645	-0.00925995	0.345317	-0.556098	-0.040074
G1392	hypothetical protein	0	0	0	0	0	-0.510045	-0.117933	-0.417011	0.0941106	0.879644
npdA	sir2 family protein	0	0	0	0	0	-0.171274	-0.2985	-0.319477	0.454433	0.527572
G1394	hypothetical protein	0	-1	0	0	-1	-0.157234	-1.0506	-0.46336	0.06783	-1.47729
G1395	lecithin retinol acyltransferase family protein	0	0	0	0	0	0.623847	0.0330925	0.00543406	1.14995	0.628264
yfeJ	glutamine amidotransferase domain protein	0	0	0	0	0	-0.155694	-0.200068	0.245344	-0.120721	0.257517
cyp18	peptidyl-prolyl cis-trans isomerase cyp18	0	0	0	0	0	-1.00673	0.0106121	-0.498339	-1.1766	0.94056
G1398	tRNA threonylcarbamoyl adenosine modification protein YjeE	0	0	0	0	0	-0.108247	-0.179089	-0.0739203	0.0749296	-0.0420555
G1399	RNA pseudouridylate synthase family protein	0	-1	-1	0	0	-0.943392	-1.06303	-1.06618	-0.578523	0.0294102
G1400	pseudouridine synthase family protein	0	0	0	0	0	0.0811032	0.119319	0.343785	0.280417	-0.405724
G1401	hypothetical protein	1	1	1	0	0	2.93784	2.47266	1.65431	1.35666	0.903625
G1402	hypothetical protein	0	0	-1	0	-1	-0.726989	-0.302052	-1.59361	-0.95832	-1.20852
G1403	hypothetical protein	0	0	0	-1	-1	-0.531375	-0.899697	-0.526325	-2.59129	-1.30369
G1404	ion transport family protein	0	0	0	0	0	-0.489538	0.0764393	0.214984	-0.356815	-0.44305
G1405	surface antigen family protein	0	0	0	0	0	0.495227	0.243934	-0.0365105	0.681001	0.526618
puuA	gamma-glutamylputrescine synthetase PuuA	1	0	0	0	0	1.39719	-0.840173	-0.803686	0.605051	0.663703
kdpE	response regulator	0	0	0	0	0	0.800414	0.0235005	-0.0506551	0.399413	-0.0440373
kdpC	K -transporting ATPase, C subunit	1	0	0	0	0	2.00355	0.147736	-0.373658	0.36933	0.272074
kdpA	K -transporting ATPase, A subunit	1	0	-1	0	0	1.45292	-0.842533	-1.18804	0.399125	0.558919
G1410	7,8-dihydro-6-hydroxymethylpterin-pyrophosphokinase family protein	0	0	0	0	0	-0.356749	0.128068	-0.0677227	0.107508	-0.848014
folB	dihydroneopterin aldolase	-1	-1	0	0	0	-1.38113	-1.03315	-0.867811	-0.3496	-0.26776
G1412	acyl-CoA dehydrogenase, N-terminal domain protein	0	0	0	0	0	0.943151	0.346924	-0.581081	0.389756	0.169243
G1413	bacterial regulatory helix-turn-helix s, AraC family protein	0	0	0	0	0	0.195676	0.208783	0.287717	0.0351965	-0.0991615
G1414	N-terminal domain of DJ-1_PfpI family protein	0	0	0	0	1	0.16892	-0.725472	-0.320483	-0.215566	1.08305
G1415	luciferase oxidoreductase, group 1 family protein	0	0	0	0	1	0.561833	-0.19825	0.0248448	0.0614131	3.19489
G1416	putative monooxygenase	0	0	0	0	1	0.269767	-0.0956827	0.790924	0.891095	1.20357
G1417	kinase/pyrophosphorylase family protein	0	0	0	0	0	0.00852761	-0.0111855	0.225827	0.365711	-0.325739
cyoD	cytochrome o ubiquinol oxidase subunit IV	0	0	0	0	0	-0.594367	-0.283501	-0.0976424	-0.790858	0.850598
cyoE	protoheme IX farnesyltransferase	0	0	0	0	0	-0.820403	-0.716437	-0.526974	-0.703312	0.632734
fis	bacterial regulatory , Fis family protein	0	0	0	0	0	-0.77915	-0.0305543	0.788673	-1.0509	0.166509
G1421	NLPA lipofamily protein	0	0	0	0	0	-0.843765	0.39964	-0.200688	-0.392752	0.095582
G1422	binding--dependent transport system inner membrane component family protein	0	0	0	0	0	-0.586246	0.472778	0.73332	0.146322	-0.433531
gloB	hydroxyacylglutathione hydrolase	-1	0	0	0	0	-1.50234	-0.0822568	-0.418924	-0.047752	-0.0868801
G1424	acetyltransferase family protein	1	0	0	1	0	2.42014	0.509507	0.660734	1.51599	0.465129
G1425	aspartate racemase family protein	0	0	0	0	0	1.08459	0.413388	0.169032	0.666619	0.26227
G1426	hypothetical protein	0	0	0	0	0	1.06953	0.594931	-0.225782	0.291386	0.571803
G1427	bacterial regulatory s, tetR family protein	0	-1	0	0	0	-0.408814	-1.19591	0.291673	0.545676	-2.01745
G1431	bacterial regulatory s, tetR family protein	0	0	0	0	-1	-0.0474743	0.0634602	0.834791	-0.456927	-1.55714
G1432	bacterial regulatory s, gntR family protein	0	0	0	0	-1	0.026984	-0.323514	0.627077	-0.570768	-1.86816
G1433	bacterial regulatory helix-turn-helix s, AraC family protein	0	0	0	0	0	-0.105773	-0.113618	-0.522943	0.126302	0.274918
G1434	putative membrane protein	0	0	0	0	0	0.640871	0.827366	0.861642	1.21358	-0.891932
G1435	bacterial OB fold family protein	1	1	1	1	1	3.50756	3.25478	1.77378	3.68264	2.51663
G1436	putative acyl-CoA dehydrogenase	1	1	1	1	1	2.75423	1.72591	1.16449	2.63808	1.75697
G1437	yqey-like family protein	0	0	0	0	0	-0.812131	-0.274171	0.231701	-0.955124	-0.438704
G1438	hypothetical protein	1	0	0	1	0	1.82831	-0.194865	-0.391372	2.05089	-0.0200234
G1448	metallopeptidase M24 family protein	1	0	0	0	0	1.38815	0.674372	0.609758	0.602326	0.596261
G1451	poly A polymerase head domain protein	0	0	0	0	0	0.21383	-0.183741	-0.21325	-0.0144257	0.201987
metF	5,10-methylenetetrahydrofolate reductase	0	0	0	0	0	-1.00503	-0.785969	0.0382902	-0.622791	0.0886914
G1453	azlC family protein	1	0	0	0	0	1.24142	0.143626	0.13687	0.858848	0.160028
mrdB	rod shape-determining protein RodA	0	0	0	0	0	-0.499638	-0.319445	-0.518102	-0.388905	-0.0933033
G1457	exonuclease family protein	0	-1	0	0	0	-0.900227	-1.09545	-0.747657	-0.705396	-0.419229
G1458	hypothetical protein	0	0	0	0	0	1.17387	-0.410349	-0.122899	0.627942	0.167594
aotQ	amino ABC transporter, permease , 3-TM region, His/Glu/Gln/Arg/opine family domain protein	0	0	0	0	0	-0.303711	-0.843606	-0.122119	-0.374452	-0.623022
G1460	bacterial regulatory s, gntR family protein	0	0	0	0	0	-0.0451771	-0.498424	-0.343024	0.0286935	-0.452526
G1461	hypothetical protein	0	0	-1	0	0	-0.696941	-0.970536	-1.28	-0.459441	-0.13662
G1462	hemin uptake hemP family protein	-1	0	-1	0	0	-1.94001	0.0431828	-4.65565	-0.50201	0.682949
G1463	hypothetical protein	0	1	0	0	0	0.0896502	1.14371	0.18951	0.109588	-0.562191
pepD	xaa-His dipeptidase family protein	1	0	0	0	1	1.61965	0.520927	0.729312	0.743259	1.11242
G1465	metallo-beta-lactamase superfamily protein	0	0	0	0	0	0.16369	-0.0592012	-0.0757151	0.164591	-0.586085
G1466	alpha/beta hydrolase family protein	0	0	0	0	0	-1.27355	-0.079888	-0.642111	-0.926132	-0.343243
G1467	hypothetical protein	0	0	0	0	0	0.452992	-0.116536	0.138814	-0.134126	-0.59271
G1468	sirA-like family protein	0	-1	0	0	-1	-0.765135	-1.06262	-0.0988482	0.188537	-1.34173
minD	septum site-determining protein MinD	0	0	1	0	0	0.742518	0.414565	1.05316	0.311159	0.89999
G1470	putative preprotein translocase subunit SecA	0	0	0	0	0	-0.395988	0.484977	0.404888	0.468289	0.207451
G1471	acyltransferase family protein	0	0	0	0	0	-0.520525	-0.169842	0.34072	-0.266075	0.296697
G1472	acetyltransferase domain protein	0	0	0	0	1	0.640739	0.222964	-0.316145	1.00083	1.88108
G1473	glutamine amidotransferase domain protein	0	0	0	0	0	-1.24561	0.126297	-0.279181	-0.443445	0.120287
G1474	rnfH Ubiquitin family protein	0	0	0	0	0	-0.789277	0.573928	0.0296852	-0.0616013	0.0523023
G1475	alanine racemase, N-terminal domain protein	0	0	0	0	0	-0.752111	0.174444	-0.0601412	0.0622391	0.504018
G1476	short chain dehydrogenase family protein	0	0	0	0	0	-0.166448	-0.0668198	-0.40039	0.447711	-0.512319
hemB	delta-aminolevulinic acid dehydratase	0	0	0	0	0	0.183114	0.574137	-0.186514	-0.00187174	0.966439
G1478	hypothetical protein	0	1	0	0	0	0.759497	1.51371	0.200664	0.443296	0.415073
G1480	bacterial regulatory helix-turn-helix , lysR family protein	0	0	0	0	0	-0.836606	-0.529821	-0.257704	0.309385	-0.867822
betA	choline dehydrogenase	1	0	0	0	0	1.64352	-0.573408	0.870425	0.758632	-0.207491
betI	transcriptional repressor BetI	0	0	0	0	0	0.434133	-0.774246	0.581028	0.499285	-0.21765
dctA	dicarboxylate symporter family protein	0	0	0	0	0	0.753231	-0.36922	0.0822751	0.438936	-0.760741
G1487	poly-beta-1,6-N-acetyl-D-glucosamine biosynthesis protein PgaD	0	0	0	0	0	-0.70398	0.116076	-0.311559	-0.158213	-0.226937
G1488	rieske domain protein	0	0	0	0	0	1.02131	-0.190156	1.13082	0.718962	-0.467508
G1489	hypothetical protein	0	0	0	0	0	1.28821	0.0296682	0.667182	0.399582	-0.146451
G1490	short chain dehydrogenase family protein	0	0	0	0	0	0.915499	0.510815	0.74624	0.47699	-0.0992753
G1491	alpha/beta hydrolase fold family protein	0	0	0	0	0	1.05632	0.587542	0.625925	0.724138	-0.594328
G1492	hypothetical protein	0	0	0	0	0	0.0510419	0.278449	-0.265569	0.613616	-0.492272
G1493	sugar (and other) transporter family protein	0	0	0	0	0	-0.149575	-0.640491	-0.0968765	0.496499	-0.0401629
G1494	peptide deformylase	0	0	0	0	0	-0.877955	-0.341661	-0.620104	-0.298352	-0.271434
G1495	major Facilitator Superfamily protein	0	0	0	0	0	0.784578	-0.161164	0.0785944	0.906218	0.33074
G1496	transketolase, thiamine diphosphate binding domain protein	0	0	0	0	0	-0.25734	0.385868	-0.940311	0.530736	0.830666
pitA	phosphate transporter family protein	0	0	0	0	0	-0.87743	0.195777	0.291628	-0.561618	-0.340633
tesA	esterase TesA	0	0	0	0	1	0.689587	0.32709	0.360438	0.468257	1.51633
G1499	asnC family protein	0	0	0	0	0	-0.570506	0.27629	-0.42501	-0.641036	0.0943229
G1500	peptidase S24-like family protein	0	0	0	0	0	-0.310675	-0.204429	0.0371128	-0.699483	-0.652044
G1501	stress-induced bacterial acidophilic repeat motif family protein	1	1	0	0	1	2.24653	1.36748	-0.12294	0.279155	2.43102
G1502	hypothetical protein	1	1	1	1	1	3.91693	2.67492	1.77008	4.69186	2.50333
G1503	competence-damaged family protein	1	1	1	1	0	3.81843	1.45941	1.83136	3.12599	1.95933
G1504	hypothetical protein	0	0	0	0	0	0.578431	-0.15561	-0.0670335	0.0986936	-0.29598
G1505	GDSL-like Lipase/Acylhydrolase family protein	0	0	0	0	0	0.00753891	-0.554881	-0.729198	0.127918	0.325103
G1506	hypothetical protein	0	0	0	1	0	0.166779	-0.146241	0.738187	2.49522	-0.0935472
G1507	methyltransferase domain protein	0	0	0	0	0	0.559309	0.574168	0.278799	1.50447	-0.00397046
G1508	hypothetical protein	0	0	0	0	-1	-0.714424	-0.170722	-0.68402	0.352525	-2.01719
G1509	enoyl-CoA hydratase/isomerase family protein	0	0	0	0	0	0.347516	-0.638726	-0.0894366	0.468965	0.272412
G1510	putative 2-aminoethylphosphonate ABC transporter, permease protein	0	0	0	0	0	0.0738612	0.609925	-0.135287	0.165379	0.0662212
G1511	putative 2-aminoethylphosphonate ABC transporter	0	0	0	0	0	0.329159	0.420315	-0.0341463	0.901849	-0.352169
G1512	NADPH-dependent FMN reductase family protein	0	0	0	0	0	-0.0777343	-0.0311056	-0.0982675	0.809796	0.466934
G1513	succinate-semialdehyde dehydrogenase	0	0	0	0	0	0.113875	-0.0205433	-0.128861	0.581311	-0.425284
G1514	hypothetical protein	0	0	0	0	0	-0.0367677	0.171782	-0.331481	0.0670194	0.610613
G1515	hypothetical protein	0	1	0	1	0	-0.54383	1.36558	-0.47775	2.23885	-1.47443
G1516	bacterial regulatory s, tetR family protein	0	0	0	0	0	0.814475	-0.270574	-0.679904	1.02434	-0.313863
G1517	hypothetical protein	0	0	0	0	0	0.720363	-0.413826	-0.772974	0.539058	-0.799733
G1518	bacterial transferase hexapeptide family protein	0	0	0	0	0	0.302224	-0.143055	-0.0580336	0.0106205	0.210049
paaF	phenylacetate-CoA ligase	0	0	0	0	0	-0.169826	0.0906744	-0.175026	0.0991025	0.281941
G1520	putative 3-hydroxybutyryl-CoA dehydrogenase	0	0	0	0	0	0.554157	0.483236	-0.106979	-0.0157596	-0.495249
paaH	phenylacetic acid degradation B family protein	0	0	0	0	0	0.227458	0.563366	0.0323998	-0.190823	-1.25998
paaA	phenylacetic acid degradation protein paaA	0	0	0	0	0	0.0375634	-0.361746	-0.0404178	-1.07198	-0.614644
G1523	L-serine ammonia-lyase	0	0	0	0	0	0.612241	0.0467245	0.892361	0.678864	0.0573544
G1524	pyridine nucleotide-disulfide oxidoreductase family protein	0	0	0	0	0	0.271202	0.722081	-0.264114	0.668888	0.115914
G1525	pyridine nucleotide-disulfide oxidoreductase family protein	1	0	0	0	0	1.33086	0.559802	-0.176918	0.845436	0.409035
G1526	dihydrodipicolinate synthase	0	0	0	0	0	-0.0432479	0.715111	-0.0262199	0.562069	0.323728
G1529	hypothetical protein	0	0	0	0	1	1.06637	0.332489	-0.381924	0.848002	1.15588
pncB	nicotinate phosphoribosyltransferase	0	0	0	0	0	-0.576124	-0.669262	-0.368669	0.186408	-0.0142832
murI	glutamate racemase	0	0	0	0	0	-0.130686	-0.345659	-0.344962	-0.057114	-0.626149
G1536	hypothetical protein	0	0	0	0	0	0.0291894	-0.124376	0.0496381	-0.0394192	-0.358114
G1537	peptidase M15 family protein	0	0	0	1	0	1.00746	0.254382	0.375546	2.06021	1.06232
maiA	maleylacetoacetate isomerase	0	1	0	1	0	-0.431158	1.43815	0.664825	2.38678	-0.755588
G1539	glyoxalase/Bleomycin resistance /Dioxygenase superfamily protein	0	1	0	1	0	-0.295178	1.26765	0.778309	1.86328	-0.99953
G1540	isochorismatase family protein	0	0	0	0	0	-0.232055	0.0166787	0.169579	-0.101342	0.288061
G1541	sigma-54 interaction domain protein	0	0	0	0	0	-0.579872	-0.189629	-0.284709	-0.186565	0.127606
tag	methyladenine glycosylase family protein	0	0	0	0	0	-0.00566099	-0.278521	-0.181019	-0.156138	-0.524798
G1543	bacterial regulatory helix-turn-helix , lysR family protein	0	0	0	0	0	-0.0500184	-0.065903	0.550433	0.0895466	-0.178887
dkgB	aldo/keto reductase family protein	0	0	0	0	0	-0.489247	0.013476	-0.119013	-0.152707	-0.0565545
G1546	efflux transporter, RND family, MFP subunit	0	0	0	0	1	0.0582755	0.808313	0.0770935	-0.186793	2.08067
G1547	sulfite exporter TauE/SafE family protein	0	0	0	0	0	-0.274338	0.875741	-0.494867	0.259674	-0.498919
ilvD	dihydroxy-acid dehydratase	0	0	0	0	0	0.385717	0.469138	0.633026	-0.219579	0.402401
fmt	methionyl-tRNA formyltransferase	0	0	0	0	0	-0.519361	-0.165209	-0.202029	-0.669083	0.149814
aldH	aldehyde dehydrogenase family protein	0	0	0	0	0	0.0770584	-0.300234	0.0671297	-0.163263	0.264802
G1554	fatty acid desaturase family protein	0	0	0	0	0	-0.37794	0.194568	-0.0606378	0.0538278	0.610948
galU	UTP-glucose-1-phosphate uridylyltransferase	0	0	0	0	0	0.694881	-0.139778	0.521028	-0.120531	0.602377
pgi	phosphoglucose isomerase family protein	0	0	0	0	0	0.777703	0.873501	0.383745	0.183856	0.40372
G1563	short chain dehydrogenase family protein	0	0	0	0	0	-1.05525	-0.280444	-0.352054	-0.655567	-0.18907
G1564	snoaL-like domain protein	0	0	0	0	1	0.83319	0.656715	0.513098	-0.423916	1.26724
G1565	tonB-dependent siderophore receptor family protein	1	0	0	0	0	1.58177	0.127189	0.425326	0.469954	-0.0495218
alr	alanine racemase	0	0	-1	0	0	-1.34415	-0.12171	-1.08705	0.0522733	-0.318877
G1567	sugar (and other) transporter family protein	0	0	0	0	0	-0.800262	-0.682918	-0.552242	0.0436731	-0.786452
bpsI	autoinducer synthetase family protein	0	0	-1	0	0	-1.07209	-0.955483	-1.25921	-0.3634	-0.609625
G1569	hypothetical protein	0	0	0	0	0	-0.508833	0.0208668	-0.441259	0.0854503	-0.389681
G157	hypothetical protein	-1	0	-1	0	0	-1.74266	0.0938426	-1.81901	-0.520253	0.298182
G1570	4'-phosphopantetheinyl transferase superfamily protein	0	0	0	0	-1	-1.09326	-0.313385	-0.611531	0.00273272	-2.12648
G1571	hypothetical protein	0	0	0	0	1	-0.566665	0.327749	0.356589	-0.173922	1.01131
guaA	GMP synthase domain protein	0	0	0	0	0	-1.01087	-0.473294	-0.172453	-1.18677	-0.311291
G1589	efflux transporter, RND family, MFP subunit	0	0	0	0	0	0.589984	0.49204	0.965676	0.761149	-0.580447
G1590	heme ABC exporter, ATP-binding protein CcmA	1	0	0	0	0	1.18713	0.221955	-0.0112541	0.630255	-0.491444
G1591	ABC-2 type transporter family protein	0	0	0	0	0	0.947781	0.5815	0.457878	0.493459	-0.800708
G1592	hypothetical protein	1	1	0	1	1	2.07127	1.78981	0.139303	1.69413	2.23553
G1596	2-oxoacid dehydrogenases acyltransferase family protein	0	0	0	0	0	0.894762	0.656824	0.0175022	0.778943	-0.197543
lpdA	dihydrolipoyl dehydrogenase	0	0	0	0	0	0.453731	0.137396	-0.101899	0.41249	-0.388657
G1598	homoserine dehydrogenase family protein	0	0	0	0	0	0.385244	-0.413108	0.0475744	-0.462619	0.281475
G1599	eamA-like transporter family protein	0	0	0	0	0	-1.00206	0.19178	0.0198407	-0.0169253	-0.0670448
G1600	hxlR-like helix-turn-helix family protein	0	0	0	0	0	-0.635942	0.186639	-0.541927	0.389783	0.220922
G1601	bacterial regulatory s, gntR family protein	0	1	0	0	0	0.315292	1.23644	0.117709	0.151862	1.17946
G1602	pyridine nucleotide-disulfide oxidoreductase family protein	0	0	0	0	0	0.246551	0.618437	-0.128817	0.0329865	0.366493
G1603	4Fe-4S binding domain protein	0	0	0	0	0	0.146774	0.357748	-0.73145	-0.0677261	-0.651278
G1604	ABC transporter family protein	0	0	0	0	0	0.808988	0.844164	0.583897	0.411883	0.703336
G1605	HEAT repeats family protein	0	0	0	0	0	0.279361	0.332838	0.257682	0.204556	0.495591
G1606	tonB-dependent siderophore receptor family protein	0	0	0	0	0	-0.951383	-0.60161	0.000908042	-0.750577	-0.756738
G1607	bacterial regulatory helix-turn-helix , lysR family protein	0	0	0	0	0	0.065704	-0.122082	0.318674	-0.0869809	-0.333084
G1608	bacterial regulatory helix-turn-helix , lysR family protein	0	0	0	0	0	0.0873794	0.123943	0.0031558	0.52075	-0.304865
G1609	3-hydroxybutyrate dehydrogenase family protein	1	1	0	0	0	1.32835	1.16769	-0.366432	1.08695	0.616629
G1610	bacterial regulatory helix-turn-helix s, AraC family protein	0	0	0	0	0	0.757723	-0.0453654	0.830255	1.34612	-0.381029
G1611	dienelactone hydrolase family protein	0	0	0	0	0	0.422027	0.190703	0.507012	-0.125424	1.12433
G1612	short chain dehydrogenase family protein	0	0	0	0	0	-0.212375	-0.669038	-1.01177	0.188776	-0.63793
G1613	putative moxY	0	0	0	0	0	0.0714021	0.556134	-0.461415	0.621603	-0.564881
antC	2Fe-2S iron-sulfur cluster binding domain protein	0	0	0	0	0	0.16966	0.165839	0.0099504	0.299685	0.274784
pqqD	coenzyme PQQ biosynthesis protein PqqD	0	0	0	0	0	0.622695	0.636821	0.513404	0.529757	0.725935
G1616	hypothetical protein	0	0	0	-1	0	0.367197	0.0226615	-0.563832	-3.0596	-0.376429
czcA	MMPL family protein	0	0	0	0	0	0.303175	0.243874	0.208191	-0.0150562	0.267723
G1618	hypothetical protein	0	0	0	0	0	0.360068	-0.633661	0.146555	0.318673	-0.597617
G1619	DNA-3-methyladenine glycosylase family protein	0	0	0	0	0	-0.650193	0.316116	-0.181757	-0.389562	-0.12206
G1620	ribosomal L11 methyltransferase family protein	-1	0	0	0	-1	-2.57495	-0.881641	-0.255723	-1.26592	-1.12337
G1621	type II transport GspH family protein	0	0	0	0	0	0.476988	-0.160505	0.951961	0.111781	-0.451677
G1622	hypothetical protein	-1	0	0	-1	0	-1.87045	-0.318552	-0.338516	-1.79348	-0.289488
G1623	hypothetical protein	-1	0	0	0	-1	-2.59287	-0.188796	-0.767788	-0.216858	-1.60767
G1624	bacterial regulatory helix-turn-helix s, AraC family protein	0	-1	-1	0	-1	-0.658944	-1.04577	-1.62839	-0.626264	-1.30125
G1625	acetyl-CoA C-acetyltransferase family protein	0	0	0	0	0	1.1761	0.765248	0.629103	0.113407	0.32466
G1626	hypothetical protein	-1	0	-1	0	0	-1.69675	-0.692454	-1.10778	-0.77326	-0.664966
G1627	protein-tyrosine phosphatase family protein	0	0	0	0	0	0.479237	0.206621	0.648091	-0.216253	-0.155131
G1628	rubrerythrin family protein	0	0	0	0	0	-0.19728	-0.862153	-0.256447	-0.586176	0.100869
trpF	N-(5'phosphoribosyl)anthranilate (PRA) isomerase family protein	0	0	0	0	0	-0.159622	-0.257209	-0.113047	-0.146414	-0.064076
G1630	glycerophosphoryl diester phosphodiesterase family protein	0	0	0	0	0	-0.328105	-0.0718695	0.259877	-0.235179	-0.539514
G1631	fatty acid desaturase family protein	0	0	0	0	0	-0.501789	-0.332783	-0.665184	-1.03025	0.300506
G1632	hypothetical protein	1	1	1	1	1	7.54794	8.51607	8.61007	9.53378	8.3481
G1633	putative membrane protein	0	0	0	0	0	-0.708645	-0.0640008	-0.744782	0.603183	-0.652619
G1634	transglycosylase SLT domain protein	0	0	0	0	1	-0.426804	0.177596	-0.595643	2.11442	1.55114
G1635	merR regulatory family protein	0	0	0	0	0	-0.737422	0.525413	0.149286	0.256024	0.154335
G1636	esterase-like activity of phytase family protein	0	0	0	0	0	-0.353068	-0.185474	-0.686393	0.318033	-0.550848
G1637	glycosyl hydrolases 25 family protein	0	0	0	0	0	0.119455	-0.0152838	0.0616996	0.694008	0.650368
G1638	hypothetical protein	-1	0	0	0	0	-1.18391	-0.0837845	-0.220583	-0.131231	0.0348647
G1639	D12 class N6 adenine-specific DNA methyltransferase family protein	0	0	0	0	0	0.24187	0.222036	0.140443	0.06714	-0.103313
G1640	D-alanyl-D-alanine carboxypeptidase family protein	0	0	0	0	0	0.499248	0.595271	0.395514	0.598474	0.94737
G1641	feoA domain protein	-1	0	-1	-1	0	-1.72526	-0.927352	-2.41217	-2.10145	-0.746158
G1642	hypothetical protein	-1	0	-1	0	0	-1.36693	-0.107203	-1.30729	-0.695456	-0.37536
dksA	RNA polymerase-binding protein DksA	0	0	0	0	0	-0.14409	-0.222647	0.0152139	-0.544876	-0.472988
G1644	hypothetical protein	0	0	0	0	0	0.768502	0.0747122	0.459471	0.676485	0.676468
G1645	bacterial regulatory s, tetR family protein	0	0	0	0	0	-0.334434	-0.937702	-0.390418	-0.808362	0.160238
argH	argininosuccinate lyase	0	0	0	0	0	-0.741057	-0.770974	-0.377682	-1.02123	0.0577571
G1647	thioesterase superfamily protein	0	0	0	0	0	1.05206	0.108042	0.771701	0.245813	-0.243303
G1648	putative metal-dependent hydrolase family protein	0	0	0	0	0	-0.167151	0.211181	-0.549949	0.35275	-0.812724
G1650	major Facilitator Superfamily protein	0	0	0	0	0	-0.100097	0.239884	0.434619	0.0957606	-0.304004
G1651	molybdopterin dinucleotide binding domain protein	0	0	0	0	0	-0.0890285	-0.100342	-0.517891	0.0304376	0.182059
G1652	mobA-like NTP transferase domain protein	0	0	0	0	0	0.474578	0.151301	0.34684	0.38397	-0.493119
G1653	molybdenum cofactor synthesis domain protein	1	0	0	0	0	1.13855	0.342447	0.920056	0.263862	-0.158085
G1654	bacterial regulatory s, gntR family protein	0	0	0	0	0	0.482864	-0.494641	-0.385482	-0.0288256	-0.148019
G1655	hypothetical protein	0	0	0	0	0	-0.280967	-0.11075	0.0646347	0.186086	-0.877914
G1656	FAD binding domain protein	0	1	0	0	0	1.03015	1.31314	0.790163	1.21992	0.168713
G1658	hypothetical protein	-1	0	0	0	0	-1.49403	-0.569314	-0.9494	-0.24658	-0.541333
G1659	bacterial regulatory s, tetR family protein	0	0	0	0	0	0.118827	-0.25685	-0.0608978	0.105199	-0.545826
ntrC	nitrogen regulation protein NR	0	0	0	0	0	1.07911	0.131645	0.321468	0.199183	-0.0457199
recX	recX family protein	0	0	0	0	-1	-0.705143	0.22647	-0.23304	0.247053	-1.63205
G1662	hypothetical protein	0	0	0	0	-1	0.98827	-0.718676	1.00157	0.48728	-1.56664
G1663	amino acid permease family protein	1	0	0	0	0	1.21745	-0.152844	-0.619939	0.454541	0.0143179
G1664	universal stress family protein	1	1	0	1	0	1.56829	1.57547	0.679272	2.51944	0.949443
G1666	hypothetical protein	0	0	0	0	-1	0.804157	0.199193	0.787875	-0.54976	-2.57848
G1667	dienelactone hydrolase family protein	0	1	0	0	1	0.977296	1.47359	-0.301868	0.751381	1.68888
grxD	monothiol glutaredoxin, Grx4 family	-1	-1	-1	0	0	-2.47958	-1.86909	-2.26529	-1.43547	0.524312
G1669	hypothetical protein	1	0	0	0	0	1.11958	0.661177	0.412401	0.974154	0.74445
G1670	bacterial regulatory s, tetR family protein	0	0	0	0	0	0.729626	0.189246	-0.0560783	1.00702	-1.32536
G1671	hypothetical protein	0	0	0	0	1	0.51944	0.887609	0.459298	1.28054	1.89288
G1672	HAD hydrolase, IA, variant 1 family protein	0	0	0	0	0	0.293382	0.282572	-0.0391463	0.638966	0.0529706
G1673	hypothetical protein	0	0	0	0	0	-0.534474	-0.0711191	-0.307455	0.0830652	-0.835955
G1675	hypothetical protein	0	-1	-1	0	-1	-0.429146	-2.37761	-2.21948	-1.277	-1.43249
G1676	bacterial regulatory s, tetR family protein	0	0	-1	0	0	0.564741	-0.239903	-1.54261	0.661568	0.181327
G1678	acetyltransferase family protein	0	0	0	0	0	-0.0859438	-0.277895	0.427799	-0.109925	-0.711425
fdxA	ferredoxin 1	-1	0	0	0	0	-2.06929	-0.849369	-0.610613	-0.696977	-0.00161396
G1680	peptidase M15 family protein	1	1	1	1	1	3.20533	1.99369	1.75009	2.41291	2.13459
G1681	outer membrane efflux family protein	0	0	0	0	0	0.102023	-0.00682931	0.186116	-0.10575	-0.0506622
lptA	lipopolysaccharide transport periplasmic protein LptA	1	0	0	0	0	1.54082	0.850407	0.951839	0.583028	0.875974
cysS	cysteine--tRNA ligase	-1	0	0	0	0	-1.76182	-0.205841	-0.632357	-0.675474	-0.394475
G1684	hypothetical protein	0	0	0	0	0	0.13642	-0.595668	-0.056191	0.0936847	0.299538
G1685	hxlR-like helix-turn-helix family protein	0	0	0	0	0	-0.180564	-0.585236	-0.707161	-0.210068	0.323552
G1686	major Facilitator Superfamily protein	0	0	-1	0	0	0.76232	0.140786	-1.12875	0.870153	0.413939
G1687	glycosyl hydrolase 108 family protein	0	0	0	0	0	-0.028974	-0.237091	-0.284466	0.203731	-0.149901
G1688	lysE type translocator family protein	1	0	1	0	0	1.64126	0.460479	1.49712	-0.207552	0.349487
G1689	ammonium Transporter family protein	0	0	0	0	0	-0.0554312	-0.229444	-0.376592	0.615389	-0.292493
G1690	membrane transport family protein	0	0	0	0	0	-0.787993	-0.473608	-0.766735	-0.459095	0.23964
G1691	tellurite resistance TehB family protein	0	0	0	0	0	-0.382404	-0.127268	-0.0640128	0.489925	-0.854424
G1692	snoaL-like domain protein	0	0	0	0	0	0.590293	0.498249	-0.284004	0.482281	0.703805
G1693	heavy-metal-binding family protein	0	0	0	0	0	0.459264	0.395285	0.47599	0.352622	-0.0899145
G1694	heavy-metal-binding family protein	-1	0	-1	0	0	-1.49823	-0.581459	-1.15033	-0.893841	-0.112981
G1695	hypothetical protein	0	0	0	0	1	0.981559	0.872495	0.870573	0.602558	1.84818
G1696	hypothetical protein	0	0	0	0	0	-0.271534	0.676624	-0.0603154	0.599234	0.0504787
sQR	succinate dehydrogenase and fumarate reductase iron-sulfur family protein	-1	0	0	0	0	-1.50739	0.937623	-0.14192	-0.242091	0.460757
G1698	fumarylacetoacetate (FAA) hydrolase family protein	0	0	0	0	0	-0.332455	-0.0282596	-0.619356	0.170337	0.025824
catA	catechol 1,2-dioxygenase	0	0	0	0	0	1.0045	0.406429	-0.00353213	0.0477751	0.567253
pcaD	3-oxoadipate enol-lactonase	0	0	0	0	0	-0.368163	0.0949757	-0.825736	-0.240175	0.345018
G1701	penicillin amidase family protein	0	0	0	0	0	0.251894	-0.100227	-0.236717	0.26697	-0.291983
feaB	aldehyde dehydrogenase family protein	0	0	0	0	0	0.673084	0.218027	0.363833	0.338107	0.190538
G1703	putative tynE	0	0	0	0	0	0.180172	-0.230905	-0.829443	0.296873	-0.811028
G1704	2Fe-2S iron-sulfur cluster binding domain protein	0	0	0	0	0	-0.241273	-0.112623	-0.355391	-0.20547	-0.296868
G1705	short chain dehydrogenase family protein	0	0	0	0	0	1.32781	0.0563276	0.320482	0.171713	0.528747
G1706	rieske domain protein	0	0	0	0	0	0.777196	-0.141326	-0.0567442	0.0406373	0.213262
G1707	marR family protein	-1	0	0	0	0	-1.86332	-0.341516	-0.78184	-0.899749	-0.37487
G1708	histidine phosphatase super family protein	1	0	0	0	0	1.28673	0.355485	0.630357	0.0779601	-0.180516
G1709	metallo-beta-lactamase superfamily protein	0	0	0	0	1	1.04284	0.607758	0.202613	0.421895	1.19864
G1710	sulfur transport family protein	0	0	0	0	0	0.814894	0.659374	0.0134724	1.07166	0.648417
G1711	hypothetical protein	-1	0	-1	0	0	-2.4268	-0.80315	-1.27238	-1.06824	-0.187636
quiC	3-dehydroshikimate dehydratase	0	0	0	0	0	0.72433	0.152684	-0.0686375	0.548649	-0.0027985
quiB	catabolic 3-dehydroquinate dehydratase	0	0	0	0	0	1.1701	0.00639035	0.611011	0.493355	-0.633395
pcaH	protocatechuate 3,4-dioxygenase, beta subunit	0	1	0	0	0	0.303386	1.28259	0.157704	-0.449757	-0.286905
G1715	3-oxoadipate enol-lactonase	1	0	0	0	0	1.19051	0.343428	-0.134416	0.751193	-0.715368
G1716	hypothetical protein	0	0	0	0	0	0.768737	0.0920669	-0.314853	0.489549	-0.781225
G1717	hypothetical protein	0	-1	0	0	0	-0.23274	-1.64644	-0.274483	-1.53042	0.753007
G1718	alpha/beta hydrolase family protein	1	1	0	0	0	2.46288	1.44362	0.854032	1.50225	0.930318
G1719	alpha/beta hydrolase family protein	0	0	0	0	0	0.0522891	-0.546782	-0.647109	-0.370433	0.198099
alc	allantoicase	0	0	0	0	0	0.462908	0.392456	-0.0141868	-0.246955	-0.322176
G1722	nucleoside-specific channel-forming , Tsx family protein	-1	0	0	0	0	-2.81891	-0.708012	-0.405916	-1.71042	-0.603491
uraD	OHCU decarboxylase	0	0	0	0	0	0.325256	-0.25537	-0.702878	0.431141	-0.451614
G1724	thioredoxin family protein	0	0	0	0	0	-0.13805	-0.0896124	-0.394046	-0.230524	0.11904
G1725	diguanylate cyclase domain protein	0	0	0	0	0	-0.299249	0.222483	-0.310111	0.595771	-0.618861
xth	exodeoxyribonuclease III	0	0	0	0	0	-0.790846	-0.102667	-0.175978	-0.362996	0.185302
pyrE	orotate phosphoribosyltransferase	0	0	0	0	0	-1.25202	-0.70859	-0.0419576	-1.1223	0.0330501
gshB	glutathione synthase	0	0	-1	0	0	-0.485416	-0.689177	-1.01	0.233349	0.839991
G1729	hypothetical protein	0	0	0	0	0	-0.336443	-0.0131137	-0.120064	-1.18772	0.124049
G1730	putative membrane protein	0	0	0	0	-1	-0.678292	-0.186929	-0.106152	0.18475	-1.27197
G1731	putative porin	1	1	1	1	1	1.53491	2.55318	1.64722	2.95394	3.01121
G1732	hypothetical protein	1	0	0	0	0	1.56318	0.581946	0.604338	1.16499	-0.384503
G1733	STAS domain protein	0	0	0	0	0	-0.726339	0.598277	0.0492072	0.424609	-0.578338
ohrR	transcriptional regulator OhrR	0	0	0	0	0	-1.11863	-0.0595552	-0.255698	0.366073	-0.890766
G1735	hypothetical protein	0	0	0	0	1	1.1282	0.854314	0.489992	1.35127	1.24515
tilS	tRNA(Ile)-lysidine synthetase	-1	-1	-1	0	-1	-1.2674	-1.97012	-2.16124	-1.0276	-1.69601
trxA	thioredoxin	0	0	0	0	0	-0.117182	0.0952682	-0.435902	-0.0178473	0.348214
ihfA	integration host factor, alpha subunit	0	1	0	1	1	0.571921	1.11265	0.566501	2.03142	1.63586
G1739	hypothetical protein	-1	0	-1	0	0	-1.22711	-0.921504	-1.43985	-0.737912	-0.0590973
G1740	acetyltransferase family protein	0	0	0	0	0	0.290316	-0.011521	0.76462	0.55472	-0.78967
G1741	hypothetical protein	0	-1	0	0	-1	-1.01502	-1.18445	-0.49774	-0.998963	-1.14915
infC	translation initiation factor IF-3	0	0	0	0	0	-0.676247	0.309067	0.692527	-0.803475	-0.403081
G1743	phosphocarrier, HPr family protein	1	0	0	0	0	1.18162	-0.382701	0.578803	-0.0164944	-0.454218
G1744	short chain dehydrogenase family protein	0	0	0	0	0	-0.152058	0.125113	-0.624604	0.349633	0.0588671
G1745	oligomerization domain protein	0	0	0	0	0	-0.127426	-0.561614	0.175926	0.379196	-0.279767
G1746	sporulation related domain protein	0	0	0	-1	0	0.48002	-0.0324998	-0.108529	-3.01068	-0.591758
lysS	lysine--tRNA ligase	0	0	0	0	0	-1.06621	-0.286438	-0.277941	-0.990452	-0.0338162
G1748	hypothetical protein	-1	0	0	0	0	-1.23744	-0.299497	-0.503368	-0.54815	-0.497368
G1749	hypothetical protein	0	0	0	0	-1	0.0691535	0.320207	0.16833	-0.881273	-1.04508
G1750	hypothetical protein	0	0	0	0	0	-0.816083	-0.390235	-0.81274	-0.419043	0.0520629
G1751	hypothetical protein	0	0	0	0	-1	-0.272163	0.198616	0.16481	0.270259	-1.26404
G1752	hypothetical protein	0	0	0	0	0	-0.649278	-0.590458	-0.422248	0.557716	-0.0310958
ureD	ureD urease accessory family protein	0	0	0	0	0	-0.684151	-0.930095	-0.731017	0.175758	0.0849137
G1754	RNA methyltransferase, RsmD family	0	0	0	0	0	-0.226714	-0.109377	-0.394366	0.0231103	-0.296648
G1755	hypothetical protein	0	0	0	0	0	-0.467268	-0.198883	0.151337	0.340628	-0.637949
G1756	hypothetical protein	0	0	0	0	0	-0.572918	0.265994	0.151963	-0.535784	-0.236126
G1757	hypothetical protein	0	0	0	0	0	-0.501558	-0.171933	0.397622	0.15063	-0.577295
nth	endonuclease III	0	0	0	0	0	-1.20449	-0.579874	-0.824014	-0.321586	-0.440837
gdhA	glutamate/Leucine/Phenylalanine/Valine dehydrogenase family protein	0	0	0	0	0	-0.373077	0.199028	0.162607	-0.656441	0.0421469
dhbF	condensation domain protein	0	0	0	0	0	-1.08048	0.328302	-0.755906	0.0717439	0.105755
G1760	5-formyltetrahydrofolate cyclo-ligase	0	0	0	0	0	-0.011296	0.628176	0.148564	0.875034	-0.136142
G1765	hypothetical protein	0	0	0	0	0	-0.450695	-0.0663887	0.839906	0.211042	-0.32783
G1766	pepSY-associated TM helix family protein	0	0	0	0	0	-0.380286	-0.527635	-0.296963	0.0921681	-0.315991
G1767	conserved region in glutamate synthase family protein	0	0	0	0	1	0.469885	0.431169	0.347387	0.16412	1.15125
G1768	hypothetical protein	0	0	0	0	0	0.176002	-0.0229637	0.186647	-0.0887824	-0.0103788
murB	UDP-N-acetylenolpyruvoylglucosamine reductase	0	0	0	0	0	-0.157105	-0.0513079	0.197814	-0.318908	-0.59938
G1770	lactonase, 7-bladed beta-propeller family protein	1	0	0	0	1	1.22565	-0.202351	0.966953	0.152412	1.25986
G1771	maoC like domain protein	1	1	1	0	1	1.6441	1.12952	1.20232	0.857979	1.28227
G1772	acetyl-CoA C-acetyltransferase family protein	0	1	1	0	1	1.11741	2.75606	1.23353	0.222821	1.59701
G1773	bacterial Transmembrane Pair family protein	0	0	0	0	0	0.243673	0.543213	-0.0753827	0.717433	-1.03621
G1774	lysE type translocator family protein	0	0	0	0	0	-0.280581	-0.155979	-0.291978	-0.179304	-0.695799
G1775	asnC family protein	0	0	0	0	0	-0.0464378	-0.449697	-0.678796	0.00671105	-0.69349
G1776	benzoate transporter family protein	-1	0	0	0	0	-1.34954	-0.409254	-0.825945	-0.0562997	-0.354559
G1777	hypothetical protein	0	0	0	0	0	-0.299769	0.870032	-0.192839	1.29398	-4.25377
G1778	ompW family protein	0	0	0	0	0	0.0877119	-0.338292	-0.123337	0.242824	-0.254581
G1779	acetyltransferase family protein	0	0	0	0	0	0.73931	0.19687	0.109865	0.766354	-1.06844
G1780	hypothetical protein	1	1	1	1	1	3.47046	1.68388	2.90668	3.95343	2.67093
G1781	hypothetical protein	0	0	0	0	0	0.393709	0.687175	0.0832812	0.557248	-1.21053
aroP	amino acid permease family protein	0	0	0	0	0	-0.437472	0.725298	0.644398	-0.13948	0.209078
G1783	NAD(P)H quinone oxidoreductase, PIG3 family protein	1	0	0	0	0	2.31106	0.573687	0.81127	0.268581	0.317374
cysH	phosphoadenosine phosphosulfate reductase	0	0	0	0	0	-0.483785	0.254322	-0.561331	-0.229017	0.539538
rng	ribonuclease, Rne/Rng family domain protein	0	0	0	0	0	-0.40496	-0.0228407	0.306435	-0.44724	-0.387002
maf	septum formation protein Maf	0	0	0	0	0	-0.341235	-0.106293	0.351335	-0.120398	-0.575536
mreB	rod shape-determining protein mreB	0	0	0	0	0	-0.87377	0.0918653	0.0293584	-0.549414	-0.0993011
gatB	aspartyl/glutamyl-tRNA(Asn/Gln) amidotransferase, B subunit	0	0	0	0	0	-0.485964	0.0918963	0.137473	-0.774439	0.27954
G1790	intracellular protease, PfpI family protein	0	0	0	0	0	0.866475	-0.344047	-0.133721	0.420225	0.310868
G1791	hypothetical protein	0	0	0	0	0	-0.0693734	-0.205389	-0.0434226	0.0923033	0.823883
G1792	putative membrane protein	-1	-1	0	0	-1	-2.51766	-1.39956	-0.104529	-0.0463392	-2.26891
G1793	hypothetical protein	-1	-1	0	0	-1	-1.89774	-1.00127	-0.446359	-0.860213	-2.22508
G1794	nitroreductase family protein	0	0	0	0	0	0.716142	-0.0362441	0.533084	0.905842	-0.1435
ppiA	peptidyl-prolyl cis-trans isomerase A	0	0	0	0	0	0.928063	0.0415402	0.979424	0.282577	0.685237
G1796	alpha/beta hydrolase fold family protein	0	0	0	0	0	0.0715215	0.123838	0.611005	0.475625	-0.240764
G1797	hypothetical protein	0	1	0	1	1	-0.339413	1.46133	0.379618	2.92968	4.10554
G1798	metallo-beta-lactamase superfamily protein	0	0	0	0	0	0.194355	-0.242932	0.35327	0.235113	0.242251
G1799	matrixin family protein	0	0	0	0	0	-0.98006	0.355991	-0.223335	-1.29747	-0.680191
G1800	matrixin family protein	0	0	0	0	0	0.207394	-0.473022	0.101773	-0.234217	-0.598366
G1801	hypothetical protein	0	0	0	0	0	-0.297214	0.641	-0.0390886	-0.0152816	-0.506736
G1802	hypothetical protein	0	0	0	0	0	-0.173572	0.115228	-0.488761	0.0416421	-0.00363541
ltrA	bacterial low temperature requirement A family protein	0	0	0	0	0	0.070785	-0.0350505	-0.470401	0.290825	0.0867061
G1804	PAP2 superfamily protein	0	0	-1	0	0	-1.23657	-0.957012	-1.04466	0.0330933	-0.318829
alx	integral membrane , TerC family protein	0	0	0	0	0	-0.484496	0.407913	-0.490681	0.330477	0.405515
G1806	glutathionylspermidine synthase preATP-grasp family protein	0	0	0	0	0	-0.746043	0.126932	-0.0424604	-0.706106	-0.943884
G1808	metal-sensitive transcriptional repressor family protein	0	0	0	0	0	-0.381921	-0.811612	0.0614434	0.39115	-0.238918
trmE	tRNA modification GTPase TrmE	0	0	0	0	0	-0.958032	-0.341022	0.0448486	-0.714129	-0.21749
rpmH	ribosomal protein L34	-1	-1	-1	0	0	-2.72322	-1.68106	-1.86793	-0.701698	-0.953855
G1811	efflux transporter, RND family, MFP subunit	0	0	0	0	1	0.0798347	0.323479	0.0491388	-0.11419	1.32853
G1812	NAD binding domain of 6-phosphogluconate dehydrogenase family protein	0	0	0	0	0	1.06335	-0.351527	0.420066	0.213612	-0.775209
G1813	cupin domain protein	0	0	0	0	0	0.0266346	0.0158657	-0.0477518	0.411886	0.0932454
G1814	hypothetical protein	0	0	0	0	0	1.2954	0.96701	0.967365	1.20883	-0.240472
G1815	periplasmic binding family protein	0	0	0	0	0	-0.627663	-0.370606	-0.578382	0.234127	-0.332603
G1816	mutT/nudix family protein	0	0	0	0	0	-0.432626	0.24254	-0.842074	0.312939	-0.791939
icmF	type VI secretion protein IcmF	0	0	0	0	0	0.0327254	0.0826311	0.376475	-0.636305	0.379859
G1820	GH3 auxin-responsive promoter family protein	0	0	0	0	0	0.478352	0.394497	0.12217	0.258353	-0.267957
G1821	hypothetical protein	0	0	0	0	0	0.941021	0.820794	-0.0675933	1.17072	0.0620415
G1822	putative signal peptide containing protein	0	0	0	0	0	0.217067	0.10552	0.323554	0.791882	-0.479415
G1823	bacterial regulatory s, tetR family protein	0	0	0	0	0	0.341493	0.60962	-0.50844	0.898264	-1.1944
G1825	ABC transporter family protein	0	0	-1	0	0	-0.981341	-0.232301	-2.1531	-0.256404	-0.53724
G1826	AMP-binding enzyme family protein	0	0	-1	0	0	-0.214962	-0.421462	-1.50146	-0.109461	0.178991
G1827	his Kinase A domain protein	0	0	0	0	0	0.0307934	0.352694	-0.524566	0.565936	-0.0209335
G1828	bacterial regulatory helix-turn-helix , lysR family protein	0	0	0	0	0	-0.144638	0.237984	-0.63348	-0.322585	-0.278207
mmpI	major membrane protein I	0	0	0	0	0	0.998204	0.368511	0.445417	1.12202	0.06672
G1830	rhodanese-like domain protein	0	0	0	0	0	0.06818	0.735552	-0.799259	0.508276	-0.162267
G1831	short chain dehydrogenase family protein	0	0	-1	0	0	-0.232551	-0.637719	-1.12069	0.130564	0.649227
G1832	bacterial regulatory helix-turn-helix , lysR family protein	0	0	0	0	0	0.970889	0.215768	0.169597	0.575732	0.0946285
G1833	hypothetical protein	1	0	0	1	1	2.62739	0.729854	0.788199	1.76742	1.14749
G1834	putative FMN-binding domain protein	0	0	0	0	0	-0.16416	-0.273314	-0.352216	0.0836435	1.0426
mdcB	triphosphoribosyl-dephospho-CoA synthase MdcB	0	0	0	0	0	0.407406	-0.180411	-0.57655	0.57132	-0.194579
mdcC	malonate decarboxylase acyl carrier protein	0	0	0	0	0	1.84049	0.503334	0.236275	0.697766	-0.655108
mdcH	malonate decarboxylase, epsilon subunit	0	0	0	0	0	0.387825	-0.197286	1.06095	0.473963	-0.443529
G1838	hypothetical protein	0	0	0	0	0	0.144791	0.448198	-0.325949	0.337405	-0.0899021
G1839	hypothetical protein	0	0	0	0	0	0.239478	0.396313	-0.0234699	-0.281498	0.310436
G1840	hypothetical protein	0	0	0	0	0	-0.427462	0.493977	0.567085	0.415018	-0.922293
trmB	tRNA (guanine-N(7)-)-methyltransferase	-1	0	0	0	0	-2.08184	-0.813389	-0.54336	-0.907607	0.0894483
G1842	NAD binding domain of 6-phosphogluconate dehydrogenase family protein	0	0	0	0	0	-0.0214502	-0.220099	0.177489	-0.375057	0.103612
G1843	hypothetical protein	0	0	0	0	0	1.15705	0.645909	0.426697	-0.0582791	-1.01609
G1844	acetyltransferase family protein	0	0	0	0	0	1.04106	0.813305	0.382759	1.21467	0.565596
vfr	cyclic AMP receptor-like protein	-1	0	0	0	0	-1.12148	-0.18761	-0.523689	-1.0263	-0.213381
rnhB	ribonuclease HII family protein	0	0	0	0	0	0.400155	-0.291148	0.607137	0.0665838	-0.27703
G1847	hypothetical protein	-1	0	0	0	0	-1.70315	0.0828125	-0.00359713	-0.49626	0.92461
G1848	prokaryotic cytochrome b561 family protein	0	0	-1	0	0	-0.881082	-0.965064	-1.077	-0.208225	0.235141
G1849	putative metal-dependent hydrolase family protein	0	0	0	0	1	-0.876838	0.283755	-0.998107	-0.0192169	1.46375
G1850	bacterial regulatory s, tetR family protein	0	0	0	0	0	-0.98593	-0.447068	-0.156472	-0.261335	0.315272
soxR	redox-sensitive transcriptional activator SoxR	0	0	0	0	0	0.870287	0.168814	0.457165	0.534894	-0.412399
G1852	hypothetical protein	0	0	0	0	0	-1.22985	-0.50177	-0.84657	-0.392541	-0.446367
G1853	major Facilitator Superfamily protein	0	0	0	0	0	0.761635	-0.244859	-0.0995266	0.757773	0.320786
G1854	ankyrin repeat family protein	0	0	0	0	0	0.273405	0.00218858	-0.50511	0.226877	0.356288
G1855	type IV/VI secretion system , DotU family domain protein	0	0	0	0	0	-0.3553	0.228329	0.133893	-0.764817	-0.120074
G1856	hypothetical protein	0	0	0	0	0	0.16858	-0.0142013	0.72688	-0.454272	0.201641
G1857	hypothetical protein	0	0	0	0	0	0.0683581	0.160666	0.523206	0.191389	-0.307334
atzF	allophanate hydrolase	0	0	0	0	0	0.400023	0.21949	-0.0621545	0.600395	0.528977
G1860	hxlR-like helix-turn-helix family protein	0	0	0	0	-1	-0.653538	-0.672485	0.161798	-0.535473	-1.53073
G1861	isochorismatase family protein	0	0	0	0	0	-0.440435	0.0939535	0.421979	0.15747	0.682291
G1862	transporter, betaine/carnitine/choline transporter family protein	-1	0	0	0	0	-1.90518	0.0994983	-0.314948	0.0621106	-0.185861
G1863	diguanylate cyclase domain protein	0	0	0	0	0	-0.796684	-0.504579	-0.23379	-0.025859	-0.593891
G1865	integral membrane TerC family protein	-1	0	0	0	0	-1.88452	-0.110247	-0.526776	-0.825401	0.0225201
G1866	azlC family protein	0	0	0	0	0	0.00667787	-0.128247	-0.0989921	0.506147	0.770361
G1867	pirin family protein	0	0	0	0	0	-0.229274	0.163586	-0.333587	-0.144022	0.742406
G1868	hypothetical protein	0	0	0	0	0	-0.19403	-0.268068	0.109082	0.420523	0.387761
G1869	amidohydrolase family protein	0	0	0	0	0	-1.10132	-0.836625	-0.356496	-0.0319402	-0.0569408
G1870	surface antigen family protein	-1	-1	-1	-1	-1	-1.32083	-1.45705	-1.25768	-2.17487	-2.89857
G1871	bacterial regulatory s, tetR family protein	0	-1	-1	0	0	0.197713	-1.17781	-1.75643	0.147138	1.57192
G1874	bacterial regulatory s, tetR family protein	0	0	0	0	0	-0.705724	0.450446	-0.928931	-0.327244	0.355846
G1875	hypothetical protein	0	0	0	0	1	0.0873274	-0.280579	-0.496311	-0.150756	2.47768
G1876	hypothetical protein	1	1	1	1	1	4.61575	3.34683	3.27687	3.71998	3.62037
G1877	lysE type translocator family protein	0	0	0	0	0	-0.450379	0.0460658	-0.188778	0.464417	-0.60656
argS	arginine--tRNA ligase	0	0	0	0	0	-0.124594	-0.0686344	-0.347043	-0.38419	0.0141507
G1879	glutathione S-transferase, C-terminal domain protein	1	0	0	0	0	1.20307	0.000236425	0.616453	1.42153	0.933821
G1880	pyridine nucleotide-disulfide oxidoreductase family protein	1	0	0	0	0	1.50713	0.454101	0.711322	0.695761	-0.291335
G1881	rhodanese-like domain protein	0	0	0	0	0	-0.0403988	0.0857497	-0.427845	-0.378945	0.761071
mnmC	tRNA U-34 5-methylaminomethyl-2-thiouridine biosynthesis protein MnmC	0	0	0	0	0	-1.12019	-0.579773	-0.549426	-0.457764	-0.503458
G1883	hypothetical protein	0	0	0	0	0	-0.207039	-0.262151	0.00526599	-0.260547	-0.208901
G1884	PHP domain protein	0	0	0	0	0	-0.221581	0.299878	0.00829781	0.558206	-0.25128
G1885	lemA family protein	0	0	0	0	-1	-0.839752	-0.556035	-0.805088	-0.882915	-1.10116
queA	tRNA ribosyltransferase-isomerase	0	0	0	0	0	-1.21154	-0.43547	-0.211358	-1.14988	-0.317088
G1887	his Kinase A domain protein	0	0	0	0	0	-1.03337	0.256587	-0.102176	0.121406	-0.732687
G1888	hypothetical protein	0	0	0	0	0	-0.617061	0.466334	-0.158948	0.406198	-0.805349
G1890	cell division ZapA family protein	0	0	0	0	0	0.250394	0.894271	0.076334	0.507567	0.330468
G1891	aminopeptidase P, N-terminal domain protein	0	0	0	0	0	0.514719	0.0959154	0.340784	-0.246049	0.367167
G1892	ubiquinone biosynthesis hydroxylase, UbiH/UbiF/VisC/COQ6 family protein	0	0	0	0	0	0.254205	0.285621	0.345504	-0.156416	0.456821
G1893	alpha/beta hydrolase fold family protein	1	0	0	0	0	1.2857	0.561387	0.558527	0.312803	0.94837
G1894	bacterial extracellular solute-binding s, 5 Middle family protein	0	0	0	0	0	0.393581	-0.0104493	0.345397	-0.0870032	-0.536764
G1895	bacterial regulatory s, tetR family protein	0	0	0	0	1	0.433475	-0.066172	0.161456	0.257265	3.16405
G1896	metallo-beta-lactamase superfamily protein	0	0	0	0	1	1.05032	0.560257	0.187473	0.426562	4.93313
G1897	transcriptional regulator family protein	0	0	0	0	1	-0.0545988	-0.479777	0.418099	0.242202	1.78679
G1898	N-terminal domain of DJ-1_PfpI family protein	1	0	0	0	1	2.48903	0.836663	0.743345	1.66363	1.81108
ktrB	ktr system potassium uptake protein B	0	0	0	0	0	0.382366	0.567772	0.746265	0.610444	0.789559
argC	N-acetyl-gamma-glutamyl-phosphate reductase	0	0	0	0	0	-0.304138	-0.0423586	0.181136	-0.748216	0.155872
G1903	hypothetical protein	1	0	0	0	0	1.17443	-0.0648181	0.871449	0.288819	0.839837
G1904	hypothetical protein	0	1	0	0	0	1.04436	1.00247	0.608173	0.885763	0.338105
G1905	transcriptional regulator PadR-like family protein	0	0	0	0	0	0.260387	-0.238161	-0.110192	0.210913	0.360291
G1906	flavin oxidoreductase / NADH oxidase family protein	1	1	1	0	1	1.82881	1.70626	2.00973	0.682864	2.22112
G1909	putative metal-dependent hydrolase family protein	0	0	0	0	0	-0.422307	0.0143033	-0.555522	0.0927614	-0.0582374
G1913	short chain dehydrogenase family protein	0	0	0	0	0	0.505066	0.12054	-0.187364	0.909759	-0.209566
G1914	short chain dehydrogenase family protein	0	0	0	0	0	0.235502	-0.178561	-0.655673	0.160558	0.439686
G1915	bacterial regulatory helix-turn-helix s, AraC family protein	0	0	0	0	0	-0.689557	0.0547535	0.222977	0.480818	-0.191483
G1916	HAMP domain protein	0	0	0	0	0	-0.956664	-0.21624	-0.512271	-0.174557	-0.502403
G1919	hypothetical protein	0	0	0	0	0	-0.227479	-0.85735	-0.382778	0.0121384	-0.371253
G1920	hypothetical protein	1	1	0	1	1	2.56848	1.32938	0.695115	2.396	3.15105
G1921	putative chorismate mutase	0	0	0	0	0	-0.0163223	0.132599	0.00134952	-0.483571	-0.225369
G1922	asnC family protein	0	0	0	0	0	-0.750098	-0.341114	-0.208601	-0.732455	-0.141652
G1923	hypothetical protein	0	-1	0	-1	-1	-0.44782	-1.62503	-0.114144	-2.94602	-4.56138
G1924	lysE type translocator family protein	0	0	0	0	0	0.751706	0.338112	-0.125302	0.835924	-1.0759
G1925	tautomerase enzyme family protein	0	0	0	0	0	0.873065	0.610423	0.577528	1.01712	-0.138512
G1926	hypothetical protein	0	0	0	0	0	-0.33059	-0.525714	-0.267617	0.421775	-0.924401
G1927	hypothetical protein	0	0	0	0	1	-0.0281946	0.603474	-0.312218	0.248657	1.30377
G1928	hypothetical protein	1	1	0	0	1	1.33865	1.0098	0.507931	0.909283	1.21774
xdhA	xanthine dehydrogenase, small subunit	0	0	0	0	0	0.950208	0.442392	-0.0645852	1.07932	0.174703
G1933	tonB dependent receptor family protein	0	0	0	0	0	0.236243	-0.103948	-0.29326	0.0989364	-0.130004
G1938	enoyl-CoA hydratase/isomerase family protein	0	0	0	0	0	0.62581	0.595899	0.456501	0.330957	0.488825
G1939	carboxyl transferase domain protein	1	0	0	0	0	1.16688	0.895087	0.555533	0.0155981	0.994385
pECR	short chain dehydrogenase family protein	0	0	0	0	0	0.731151	0.115896	0.22934	0.511785	0.76694
G1942	glutathione-dependent formaldehyde-activating enzyme family protein	0	0	0	0	0	-0.182175	0.100303	-0.419312	-0.317471	-0.0334131
G1943	heavy-metal-associated domain protein	0	0	-1	0	0	-1.05417	-0.116116	-1.1004	0.374501	-0.0235045
benD	short chain dehydrogenase family protein	0	0	0	0	0	0.531811	0.137399	0.323474	0.0638241	0.169808
G1945	bacterial regulatory helix-turn-helix , lysR family protein	0	0	0	0	0	0.468896	-0.189081	0.168837	0.199857	0.0733541
G1946	eamA-like transporter family protein	0	0	0	0	0	0.271985	0.0288228	-0.187952	0.307754	0.792176
papC	fimbrial family protein	0	0	0	0	0	1.07023	-0.0277329	0.232605	-0.749901	-0.758297
G1948	fimbrial family protein	0	0	0	-1	0	-0.790775	-0.372522	0.233638	-2.25306	-0.628504
G1949	hypothetical protein	0	0	0	0	0	0.503996	0.843553	-0.339528	-0.336494	0.220868
queG	epoxyqueuosine reductase	0	0	0	0	0	-0.854418	-0.649571	-0.658242	-0.351178	-0.193909
G1951	helix-turn-helix family protein	0	0	0	0	0	-0.184317	-0.0909365	0.428065	0.25231	-0.516329
G1952	putative antibiotic resistance	0	0	0	0	0	-0.154689	0.375599	0.188252	0.126655	-0.330212
G1953	amino ABC transporter, permease , 3-TM region, His/Glu/Gln/Arg/opine family domain protein	0	0	0	0	-1	-0.0622819	0.293931	-0.108791	0.706641	-1.34793
gltI	bacterial extracellular solute-binding s, 3 family protein	0	0	0	0	-1	0.437741	-0.407875	0.413309	0.727095	-1.31645
G1955	sulfur acquisition oxidoreductase, SfnB family	0	1	0	0	0	-0.047373	1.58673	0.138068	1.37247	-0.286147
G1956	NLPA lipofamily protein	0	0	0	0	0	0.483204	0.201442	0.110822	0.319434	-0.407809
G1957	NLPA lipofamily protein	0	1	0	0	0	0.00345673	1.09221	-0.0522269	0.36533	-0.564371
G1958	type VII secretion system (T7SS), usher family protein	0	0	0	0	-1	0.0719173	0.50792	-0.186571	0.887862	-2.5143
G1959	hypothetical protein	1	1	0	0	0	1.4678	1.67845	0.35806	0.483256	0.128113
G1960	phospholipase D family protein	1	0	1	0	0	1.62256	0.701723	1.09279	1.20765	-0.0287571
G1967	hypothetical protein	1	1	1	1	1	6.96797	4.98765	4.9224	5.06933	4.44445
G1968	putative aliphatic sulfonates-binding protein	0	1	0	0	0	0.690718	1.06346	-0.533098	0.923619	-0.114674
tdt	C4-dicarboxylate transporter/malic acid transport family protein	0	0	0	0	0	-0.246638	0.202109	-0.0978124	0.581837	0.6569
G1970	ankyrin repeat family protein	0	0	0	0	0	0.00379668	-0.74014	-0.00690602	0.40171	-0.524176
G1971	ABC transporter family protein	0	1	0	0	0	0.211125	1.54367	0.0869748	0.226321	-0.812031
hyuE	asp/Glu/Hydantoin racemase family protein	0	0	0	0	-1	0.122909	0.716192	0.420031	0.114248	-1.23636
G1973	bacterial regulatory s, gntR family protein	0	0	0	0	0	-0.183108	-0.63938	-0.721202	-0.441426	0.330216
G1974	bacterial regulatory helix-turn-helix , lysR family protein	0	0	0	0	0	-0.0566604	-0.544629	0.218614	0.119219	-0.217803
G1975	bacterial regulatory , arsR family protein	0	0	0	0	0	-0.926573	-0.0181444	0.279764	-0.495285	-0.0598444
arsB	arsenical-resistance protein	0	0	0	0	0	0.481916	-0.0256247	-0.138802	-0.549813	-0.0711552
G1977	bolA-like family protein	0	0	0	0	0	-0.749766	-0.836094	-0.689865	-1.11454	-0.0154479
G1987	hypothetical protein	0	0	0	0	0	-0.684329	-0.136651	0.0675212	0.268653	-0.711785
G1988	hypothetical protein	0	1	0	0	0	-0.288901	1.04733	0.174789	0.160168	-0.1457
G1994	hypothetical protein	0	0	0	0	0	-0.696331	-0.213692	-0.331559	0.740642	-0.813806
G1995	diguanylate cyclase domain protein	-1	0	0	0	0	-1.32462	-0.236029	-0.556446	0.093276	-0.285491
G1996	short chain dehydrogenase family protein	0	0	0	0	0	-0.0713597	-0.433874	-0.240124	0.422324	-0.366819
G1997	putative lipoprotein	1	1	1	1	1	2.58903	3.31886	1.57272	3.59174	2.89273
G1999	ankyrin repeats family protein	0	0	0	0	0	-0.308065	-0.0773441	-0.0190833	-0.259324	0.0986262
G2000	methyltransferase domain protein	0	0	0	0	0	-0.112001	-0.190285	0.0911185	-0.459095	-0.0535292
dld	D-lactate dehydrogenase, membrane binding family protein	0	0	0	0	0	0.0495215	-0.0654402	0.239241	0.0993734	-0.224478
G2005	hypothetical protein	0	0	0	0	0	-0.235134	0.201953	-0.0868984	0.45163	-0.0572241
ligA	DNA ligase, NAD-dependent	0	0	0	0	0	-0.588874	-0.342642	0.467974	-0.0635908	-0.0577309
ydhP	inner membrane transport protein ydhP	0	0	0	0	0	-0.180857	0.0785085	-0.196941	0.457296	0.295486
G2021	bacterial regulatory s, gntR family protein	0	0	0	0	0	0.121332	-0.0491571	0.0294547	0.0481304	-0.349764
G2044	sulfite exporter TauE/SafE family protein	0	0	0	0	0	-0.601769	-0.390362	-0.308368	-0.766207	-0.77147
G2049	bacterial regulatory s, tetR family protein	0	0	0	0	0	-0.960354	-0.066259	0.50152	-0.0524469	-0.0868146
G2051	hypothetical protein	0	0	0	0	-1	-0.212069	-0.771423	0.112619	-1.36005	-1.02752
abhD3	alpha/beta hydrolase fold family protein	0	0	0	0	0	0.593484	0.563284	0.871928	0.588805	0.474313
G2059	PAP2 superfamily protein	0	1	0	0	1	-0.781858	1.15437	0.495283	0.000646399	1.41863
folP	dihydropteroate synthase	0	0	0	0	0	-0.644146	-0.223525	-0.606409	-0.262611	-0.458491
G2060	cyclic nucleotide-binding domain protein	0	0	0	0	0	-0.0565787	-0.00790224	0.503639	0.489521	-1.02892
dnaX	DNA polymerase III, subunit gamma and tau	0	-1	0	0	0	-0.528038	-1.00895	-0.191735	-0.138502	-0.157821
G2062	tonB dependent receptor family protein	0	0	0	0	0	0.00993878	0.269491	-0.162783	0.203532	-0.512543
mdfA	multidrug transporter MdfA	0	0	-1	0	-1	-0.763996	-0.980486	-1.00826	-0.559694	-1.0241
G2078	MATE efflux family protein	1	1	0	1	1	2.53707	1.41806	0.73702	1.80017	1.5789
G2082	hypothetical protein	0	0	0	0	0	0.0972639	-0.0320524	0.127786	0.74231	-0.940009
G2083	TPR repeat family protein	0	0	0	0	0	-0.790658	-0.334799	-0.503802	0.266599	-0.094788
G2084	subtilase family protein	0	0	0	0	0	0.403957	0.0514376	0.0698601	0.921011	0.0952684
G227	response regulator	0	0	0	-1	0	0.0686144	0.563348	0.031837	-3.39036	-0.910984
G229	putative methyltransferase domain protein	0	0	0	0	0	0.367385	0.00303817	-0.338587	0.0667483	0.0992031
G231	magnesium chelatase, subunit ChlI family protein	0	0	0	0	0	-0.200153	0.0434709	-0.0570371	-0.475241	-0.689665
map	methionine aminopeptidase, type I	0	0	0	0	0	-0.487717	-0.583072	-0.112159	-0.115961	0.168368
G240	merR regulatory family protein	0	0	0	0	0	0.484514	-0.823025	-0.53561	-0.407775	0.559069
G242	phage head morphogenesis , SPP1 gp7 family domain protein	1	0	0	1	0	2.8803	0.951662	0.762656	2.37817	0.313075
sdhC	succinate dehydrogenase, cytochrome b556 subunit	-1	0	0	0	0	-1.40353	-0.405033	-0.452178	-1.1714	0.308616
G251	major Facilitator Superfamily protein	0	0	0	0	0	0.278203	-0.187161	-0.00157287	0.536453	0.120815
G256	major Facilitator Superfamily protein	0	0	0	0	0	1.02798	0.708084	0.2837	0.746819	-0.916316
G260	condensation domain protein	0	0	-1	0	0	-0.38126	-0.312572	-2.46293	-0.932928	-0.519151
xdhB	xanthine dehydrogenase, molybdopterin binding subunit	0	0	0	0	0	0.912992	0.378662	-0.123643	0.576831	0.362606
G27	type I secretion C-terminal target domain protein	0	0	0	0	0	0.617172	0.966579	0.402194	1.07847	0.287024
G284	filamentous hemagglutinin family N-terminal domain protein	0	-1	0	-1	-1	-0.568863	-1.59235	-0.739711	-2.16524	-1.88682
G289	phosphoenolpyruvate-protein phosphotransferase	0	0	0	0	0	-0.0514027	0.262016	-0.520358	-0.295742	0.463026
G293	putative poly alpha-glucosyltransferase	0	0	0	0	0	0.164871	-0.0260327	0.666372	0.332322	-0.296357
recO	DNA repair protein RecO	0	0	0	0	-1	-0.0403523	0.160584	0.483968	0.287142	-1.12186
sohB	peptidase S49 family protein	0	0	0	0	0	1.06387	0.382671	-0.334305	0.206157	0.827633
G301	putative outer membrane protein A	0	0	0	0	0	0.124176	-0.34654	-0.407744	0.619064	-0.179292
G306	acyl-CoA dehydrogenase, N-terminal domain protein	0	0	0	0	0	0.418456	-0.626679	-0.236997	-0.201331	-0.234346
G308	peptidase C26 family protein	0	0	0	0	0	0.318565	-0.486678	0.0323438	-0.271322	-0.256989
G310	repair family protein	0	1	0	0	1	1.09731	1.05796	0.969026	1.3123	2.01997
G314	PGAP1-like family protein	0	0	0	0	0	0.441059	-0.112881	-0.368086	0.300184	-0.199657
cah	sulfate transporter family protein	0	1	0	1	0	0.849862	1.40759	0.492015	2.24923	0.963426
ynfL	bacterial regulatory helix-turn-helix , lysR family protein	0	0	0	0	0	-0.619454	-0.477664	-0.20245	-1.00509	-0.476838
G320	pyridine nucleotide-disulfide oxidoreductase family protein	0	-1	-1	0	-1	-0.184203	-1.6445	-1.99713	0.464373	-1.6185
G322	putative filE	0	0	0	0	0	0.46332	0.00613824	0.527074	0.397503	-0.949531
fghA	S-formylglutathione hydrolase	0	0	0	0	0	0.903133	0.166475	0.0689095	0.196118	0.618132
G331	pyridoxal-phosphate dependent enzyme family protein	0	0	0	0	0	-0.0945803	0.255177	-0.437208	0.43922	-0.488519
G336	hypothetical protein	0	0	0	0	0	0.142344	0.206162	0.298582	0.679041	-0.949972
G338	hypothetical protein	0	0	0	0	0	0.33066	-0.225566	-0.694113	0.29322	0.410652
G343	bacterial regulatory s, tetR family protein	0	0	0	0	0	0.243325	-0.241083	-0.0667537	0.496981	-0.541292
cobS	cobalamin-5-phosphate synthase family protein	0	0	0	0	0	-0.112214	-0.769454	-0.411244	1.35044	-0.507271
gpmA	histidine phosphatase super family protein	0	0	0	0	0	0.0238962	0.495866	0.261204	0.971436	-0.215655
G349	sugar (and other) transporter family protein	0	0	0	0	0	-1.01602	-0.307427	-0.331347	-0.176844	-0.216947
G351	eamA-like transporter family protein	0	0	0	0	0	1.00173	0.206732	0.278512	0.963867	-0.631698
G356	type II/IV secretion system family protein	0	0	0	-1	0	-0.977642	-0.205118	-0.409088	-2.11547	-0.76362
mrcB	penicillin-binding protein 1B	0	0	0	0	1	0.044392	0.0691274	-0.256995	0.493883	1.16072
G362	esterase family protein	0	0	-1	-1	0	-0.986031	-0.969385	-2.5736	-1.75836	-0.358848
G364	putative membrane protein	0	0	0	0	0	-0.909221	-0.0724265	-0.150671	-0.332904	0.168026
G366	AAA domain protein	0	0	0	0	0	-0.443643	-0.609754	-0.554345	-0.348524	-0.646612
metH	methionine synthase	0	0	0	0	0	-0.289906	-0.388333	-0.200352	-1.10179	-0.0963712
G375	hypothetical protein	-1	0	0	0	0	-1.63153	-0.206463	-0.797803	0.530809	-1.45236
G377	bacterial regulatory helix-turn-helix , lysR family protein	0	0	0	0	0	-0.12771	0.151885	-0.292709	0.234423	-0.179084
G381	putative membrane protein	0	0	0	0	0	-0.167715	-0.255219	-0.228332	0.124487	0.0639253
glmU	UDP-N-acetylglucosamine diphosphorylase/glucosamine-1-phosphate N-acetyltransferase	0	0	0	0	1	0.743744	0.290588	0.57528	-0.000967789	1.05082
G385	MATE efflux family protein	0	0	0	0	0	-0.540862	-0.121973	-0.180042	0.569634	-0.504283
G390	hypothetical protein	0	0	0	0	0	1.03938	-0.0504068	-0.277809	1.17277	0.0732762
G3973	hypothetical protein	0	0	0	0	0	0.726266	0.124422	0.102167	0.158506	-0.185118
rpsI	30S ribosomal protein S9	-1	0	0	0	0	-2.04113	-0.619688	-0.742628	-0.393034	-0.507966
rpsP	ribosomal protein S16	-1	0	0	0	0	-2.13263	-0.554842	-0.558197	-1.17068	-0.549302
rpsQ	30S ribosomal protein S17	0	0	0	0	0	-1.01828	-0.190938	0.06204	-0.923384	0.176886
ispZ	intracellular septation A family protein	0	0	0	0	0	-0.759825	0.318394	-0.3177	0.0229204	0.0669143
G3978	patatin-like phospholipase family protein	0	0	0	0	0	0.0793274	-0.380689	-0.58682	-0.119956	-0.299074
G398	glutathione-dependent formaldehyde-activating enzyme family protein	1	0	0	0	0	1.28625	0.423805	0.84482	1.21192	0.221948
G3981	hypothetical protein	0	0	0	0	0	-0.621561	0.111298	-0.207918	-0.712639	-0.52779
nuoK	NADH-quinone oxidoreductase subunit K	0	0	0	0	1	-0.397798	0.27631	0.34284	-0.188168	1.02421
lpxA	acyl-[acyl-carrier-protein]-UDP-N-acetylglucosamine O-acyltransferase	0	-1	-1	0	-1	-0.562335	-1.3785	-1.05961	-0.837653	-1.08877
rplK	ribosomal protein L11	-1	0	0	0	0	-1.16877	-0.407569	0.351895	-1.03819	-0.519428
G3985	merR HTH regulatory family protein	0	1	0	1	1	1.5366	2.18143	0.486812	2.40166	1.65662
rho	transcription termination factor Rho	0	0	0	0	-1	-0.256269	-0.283831	0.28863	-0.378922	-1.01038
citN	citrate transporter family protein	0	0	0	0	0	-0.363405	0.0878786	0.880156	0.211103	-0.597882
G3993	nitrogen regulatory P-II family protein	0	0	0	0	0	0.0122153	0.159633	0.332614	-0.43914	0.681351
G3994	bacterial regulatory s, tetR family protein	0	0	0	0	0	-0.999796	-0.205841	-0.261943	0.0134627	-0.448153
rpmA	ribosomal protein L27	-1	0	0	0	0	-1.41655	-0.0964888	0.346197	-0.0347159	-0.305389
G3996	putative membrane protein	0	0	0	0	0	-0.873087	-0.171514	0.0349974	0.850397	3.01584
purM	phosphoribosylformylglycinamidine cyclo-ligase	0	0	0	0	0	-1.29841	-0.469722	0.0474009	-0.939757	-0.670605
G3998	ycxB-like family protein	-1	-1	-1	0	0	-1.34273	-1.22644	-1.34518	-1.06797	-0.390702
G3999	hypothetical protein	0	0	0	0	-1	0.232951	-0.559851	-0.474651	-0.529315	-1.26548
G4000	entericidin EcnA/B family protein	0	1	0	0	1	0.917848	2.6444	-0.163413	1.57128	2.15628
rpmE	ribosomal protein L31	-1	0	-1	0	0	-3.43866	0.0873387	-1.2416	-1.44195	-0.844557
G4002	two-component system response regulator protein	0	0	0	0	0	0.230395	0.273852	-0.0984986	0.668573	-0.247264
G4003	hypothetical protein	0	0	0	0	0	-1.31522	-0.495576	-0.373119	-0.3344	-0.479673
rplE	ribosomal L5 family protein	0	0	0	0	0	-1.16668	-0.00287931	-0.133337	-1.07859	-0.0688758
dnaB	replicative DNA helicase	-1	0	0	0	0	-1.17862	-0.806616	-0.682367	-0.391639	-0.485573
G4006	hypothetical protein	1	1	0	1	1	2.70072	3.08046	0.0805672	3.43205	3.1885
ispG	4-hydroxy-3-methylbut-2-en-1-yl diphosphate synthase	0	0	0	0	0	-0.215037	-0.098281	0.0598557	-0.221439	-0.289338
G4008	endoribonuclease L-PSP family protein	0	0	0	0	0	-0.356843	0.438774	-0.00178429	-0.50173	0.419248
G4009	HD domain protein	0	0	-1	0	0	-0.578858	-0.4139	-1.01046	-0.315851	-0.304705
G4010	addiction module antitoxin, RelB/DinJ family protein	0	0	0	0	0	-0.39792	-0.33991	-0.58341	-0.122433	-0.492478
G4014	hypothetical protein	0	0	-1	0	0	1.32135	1.94061	-3.94077	-0.0761992	-3.0354
G4015	ring hydroxylating beta subunit	0	0	0	0	0	-0.5542	0.629241	-0.37745	0.506579	1.02705
G4016	lipopolysaccharide-assembly family protein	0	0	0	0	0	0.166745	0.226496	0.29946	0.339014	0.033235
rph	ribonuclease PH	0	0	0	0	0	-0.649469	-0.573629	-0.316238	-0.940216	0.211198
pstB	phosphate ABC transporter, ATP-binding protein	0	0	0	0	0	0.0605422	0.622063	0.0772592	-0.0386345	0.217372
ureG	urease accessory protein UreG	0	0	0	0	0	0.620629	0.45099	0.4389	-0.116978	0.243286
G4020	hypothetical protein	0	0	0	0	-1	-0.670415	0.70163	-0.233677	0.569391	-1.13089
ftsL	cell division protein FtsL	0	0	0	0	0	0.510944	-0.0263802	0.826098	0.172044	0.0153359
G4022	bacterial regulatory helix-turn-helix , lysR family protein	0	0	0	0	0	0.213365	0.07556	0.18098	0.713713	0.700811
G4023	hypothetical protein	0	1	1	0	1	0.923293	1.21262	1.21778	1.41532	1.20503
G4024	pilZ domain protein	0	0	0	0	0	0.302514	-0.365947	0.67561	-1.05454	0.201432
nusG	transcription termination/antitermination factor NusG	-1	0	0	0	0	-1.73354	-0.780154	-0.261257	-1.0284	-0.950696
G4026	H antiporter-2 family protein	0	0	0	0	1	0.146747	0.30207	0.206884	0.284854	1.73067
G4027	histidine phosphatase super family protein	0	0	0	0	0	0.0470104	0.382552	0.239772	-0.0928108	0.334848
G4028	hypothetical protein	1	1	1	1	0	1.86613	2.42387	2.085	2.22384	0.868811
rplD	50S ribosomal protein L4	0	0	0	0	0	-1.13012	-0.436942	0.182378	-1.22729	-0.0764955
gmk	guanylate kinase	0	0	0	0	0	-1.07314	-0.821324	-0.335646	-0.729172	-0.837562
aceE	pyruvate dehydrogenase (acetyl-transferring), homodimeric type	0	0	0	0	0	-0.189803	-0.0881773	-0.123236	-0.656793	0.0888663
rlpA	rare lipoA family protein	0	0	0	0	0	-0.918311	0.260281	-0.613045	0.0656512	-0.810818
G4033	hypothetical protein	0	0	0	0	0	-0.728933	0.163571	-0.308402	-0.0559074	-0.694605
cspE	'Cold-shock' DNA-binding domain protein	0	0	1	0	0	0.618377	-0.917878	1.28453	0.372558	-0.959495
G4035	putative rND type efflux pump	0	0	0	0	0	-0.296583	0.590848	0.135828	0.245903	-0.0231159
G4036	hypothetical protein	0	0	0	0	0	-0.495753	-0.21648	0.134965	0.4431	-0.890526
scpB	segregation and condensation protein B	0	0	0	0	0	-0.675401	-0.381655	-0.784914	-0.253852	-0.164981
G4038	bacterial transcriptional regulator family protein	0	0	0	0	0	0.235713	-0.241969	0.151865	0.22099	0.564755
G4039	putative membrane protein	0	0	0	0	0	-0.468955	-0.0499727	-0.193347	0.333895	-0.0977849
rimM	16S rRNA processing protein RimM	0	0	0	0	0	-1.24236	-0.407885	-0.0365716	-1.14731	-0.54873
fabZ	beta-hydroxyacyl-(acyl-carrier-protein) dehydratase FabZ	0	-1	-1	0	-1	-0.87433	-2.31997	-1.63193	-0.83926	-1.34631
hutC	histidine utilization repressor	-1	-1	0	0	0	-1.3962	-1.46653	-0.375895	0.153769	-0.730015
qseB	response regulator	0	0	0	0	0	1.01865	0.437267	0.312394	-0.34922	0.816749
G4051	sugar (and other) transporter family protein	0	0	0	0	0	0.225055	0.469118	0.606926	0.167704	-0.563016
G4052	capsule assembly Wzi family protein	0	0	0	0	0	-0.398877	-0.348586	0.365766	-0.363377	0.946858
yajC	preprotein translocase, YajC subunit	0	0	0	0	0	-0.817686	-0.88316	-0.59878	-1.13859	0.294275
frr	ribosome recycling factor	0	0	0	0	0	-0.532264	-0.230366	0.629358	-0.688733	0.122721
G4057	nitroreductase family protein	0	0	0	0	1	0.259354	0.064939	-0.265255	-0.122696	1.18046
G4058	phosphopantetheine attachment site family protein	0	0	0	0	0	0.189674	-0.0421409	0.574972	-1.17621	-0.597981
G4059	beta-lactamase superfamily domain protein	0	0	0	0	0	0.624333	0.678431	0.12057	0.652055	0.103831
dnaJ	chaperone protein DnaJ	0	0	1	0	0	1.034	0.0430039	1.04436	0.0295519	0.696553
rstA	two-component system response regulator protein	1	1	0	0	1	1.20832	1.24409	0.88073	0.667511	2.11814
pntB	NAD(P) transhydrogenase beta subunit	-1	0	0	0	0	-1.9714	0.480107	-0.9902	0.14084	0.384284
G4063	transporter, betaine/carnitine/choline transporter family protein	0	0	0	0	0	0.523374	0.0358096	0.126279	0.569459	0.683381
G4064	oxidoreductase NAD-binding domain protein	-1	-1	-1	-1	-1	-2.47016	-3.0794	-1.80364	-3.22938	-1.14331
grxC	glutaredoxin 3	0	0	0	0	0	0.550434	0.745781	0.85246	0.143791	-0.00342054
ribE	riboflavin synthase, alpha subunit	0	0	0	0	0	-0.631549	0.586737	-0.299957	-0.209869	-0.0487045
rpsU	ribosomal protein S21	-1	0	0	-1	0	-2.11476	-0.401109	-0.655022	-1.8235	-0.2304
G4068	hypothetical protein	0	0	0	0	0	0.0586212	-0.276807	-0.44862	-0.420947	0.464912
G4069	ompA family protein	0	0	0	0	0	-0.607578	-0.535274	-0.188259	-0.0580389	0.37069
acoA	2,6-dichlorophenolindophenol oxidoreductase subunit alpha	1	0	1	1	0	1.36345	0.0892543	1.39776	2.41035	-1.27523
G4071	NUDIX domain protein	0	0	0	0	0	0.50787	0.117888	-0.0835933	0.329414	0.944567
uppS	di-trans,poly-cis-decaprenylcistransferase	0	0	0	0	0	-0.613063	-0.254228	0.827821	-0.514023	-0.409697
hscB	fe-S protein assembly co-chaperone HscB	0	0	0	0	0	-0.213119	0.00467445	-0.0756176	-0.0260206	-0.42764
yciI	protein yciI	0	0	0	0	0	-0.473684	-0.44492	0.102412	-0.266763	-0.0384467
rsmH	16S rRNA (cytosine(1402)-N(4))-methyltransferase	0	0	0	0	0	0.892341	-0.0940012	0.83916	0.987322	-0.0763389
rplT	ribosomal protein L20	-1	0	0	0	0	-1.88338	0.330037	0.458911	-0.182491	0.341323
G4082	hypothetical protein	0	1	0	1	1	1.23679	3.5432	0.800074	3.93871	2.18312
iscX	feS assembly protein IscX	0	0	0	0	0	-0.881962	-0.0929876	-0.286029	-0.74867	-0.411519
G4084	yecA family protein	0	0	0	0	0	-0.482119	-0.297769	-0.688622	-0.179497	-0.204236
sspB	stringent starvation B family protein	0	0	0	0	0	0.596838	-0.695472	0.206828	0.324098	-0.159354
prfB	peptide chain release factor 2	0	-1	0	0	0	-0.777982	-1.21688	0.490681	-0.89648	-0.38357
G4087	hypothetical protein	0	0	0	0	1	1.0161	0.0822827	0.267464	0.320262	1.29668
G4088	hypothetical protein	0	0	-1	0	0	-0.804859	-0.214143	-1.10427	0.00810139	-0.013057
G4089	putative arginine-tRNA-transferase	0	0	0	0	0	0.567079	0.596279	0.142397	0.895583	-0.452142
astA	arginine N-succinyltransferase	0	0	0	0	0	0.900264	0.191368	0.438395	0.22167	-0.558108
tolR	protein TolR	0	0	0	0	1	1.32196	0.280615	0.719742	0.568259	1.22577
csaA	export-related chaperone CsaA family protein	1	0	0	1	0	1.25947	0.75379	0.221855	1.67852	-0.0718528
tolQ	protein TolQ	0	0	0	0	1	0.270374	0.441238	0.0408358	0.333791	1.42767
G4094	amino acid synthesis family protein	0	0	0	0	0	0.162496	-0.314436	0.121876	0.163801	-0.620636
rpsN	ribosomal S14p/S29e family protein	0	0	0	0	0	-0.906573	-0.180444	0.564427	-0.89788	0.106178
rhlB	helicase domain protein	0	0	0	0	0	-0.627801	-0.61076	-0.406071	0.00148282	-0.571843
rpoB	DNA-directed RNA polymerase, beta subunit	0	0	0	0	0	-0.148189	0.04791	0.506424	-0.6447	-0.154798
eda	2-dehydro-3-deoxyphosphogluconate aldolase/4-hydroxy-2-oxoglutarate aldolase family protein	0	0	0	0	0	0.144935	0.360611	0.261272	-0.228653	0.654585
G4099	hypothetical protein	0	0	0	0	0	0.99195	0.375796	0.993188	0.0144014	-0.0425103
G4100	sulfate ABC transporter, sulfate-binding family protein	0	1	0	0	-1	-0.858835	1.63662	-0.481971	0.215563	-1.10253
ppa	inorganic pyrophosphatase	-1	0	0	0	0	-1.35549	-0.448754	-0.457426	-0.905593	0.489898
G4102	hypothetical protein	1	1	1	1	1	4.53089	2.7287	2.47468	4.3623	3.90297
ihfB	integration host factor, beta subunit	0	0	0	0	1	0.908528	0.219717	0.880537	1.20969	1.21117
rplP	ribosomal protein L16	0	0	0	0	0	-1.13461	-0.442786	-0.295697	-1.07152	0.0626159
G4105	hypothetical protein	0	0	0	0	0	1.22834	0.804505	0.198604	1.17753	0.413867
G4106	hypothetical protein	0	0	0	0	0	0.214581	0.568955	-0.251381	0.513901	0.110908
G4107	sulfite exporter TauE/SafE family protein	0	0	0	0	0	-0.755424	0.476317	-0.304223	0.319872	-0.493256
G4108	putative lysine decarboxylase family protein	1	0	0	0	1	2.64026	0.879911	0.242686	1.46108	2.72503
G4109	eamA-like transporter family protein	0	0	0	0	0	-0.499226	0.130983	-0.578022	0.0625002	-0.943384
modA	molybdate ABC transporter, periplasmic molybdate-binding protein	0	0	0	0	0	0.748541	0.315356	0.299138	0.825531	0.896872
G4110	lysE type translocator family protein	0	0	0	0	0	-0.794354	-0.887671	-0.812738	-0.584649	-0.248605
G4111	glycine-zipper containing OmpA-like membrane domain protein	1	1	1	1	1	3.99218	6.07381	6.05629	7.5056	7.17079
G4112	hypothetical protein	0	0	0	0	0	0.179515	-0.314484	0.725369	0.417631	0.0309647
G4113	lrgB-like family protein	0	0	0	0	0	-0.269152	0.733304	-0.20542	0.458534	0.0310251
G4114	putative membrane protein	0	0	0	0	0	-0.602157	0.453216	0.192424	0.459578	-0.778967
etfA	electron transfer flavoFAD-binding domain protein	0	1	1	0	1	0.796134	1.57152	1.3744	-0.229516	1.04127
G4116	small Multidrug Resistance family protein	0	0	0	0	0	-0.475825	0.605416	-0.278151	0.432812	0.317352
rpsL	ribosomal protein S12	0	0	0	0	0	-1.02148	-0.133875	0.4004	-0.633291	0.178321
tmk	thymidylate kinase	0	0	0	0	0	-0.301239	-0.0851148	0.298322	-0.330131	-0.555469
G4119	putative membrane protein insertion efficiency factor	0	0	0	0	-1	-0.3826	-0.235104	0.392446	-0.624394	-1.20484
cyoC	cytochrome o ubiquinol oxidase, subunit III	0	0	0	0	0	-0.399244	-0.0119971	0.157997	-0.643452	0.846416
ksgA	dimethyladenosine transferase	0	0	0	0	0	-0.146861	0.170084	0.234736	0.0407486	-0.258907
G4122	transporter associated domain protein	0	0	0	0	0	-0.4984	0.528899	-0.197297	0.266319	0.874918
G4123	polyketide cyclase / dehydrase and lipid transport family protein	0	0	0	0	1	0.832951	0.358061	0.201939	0.598629	1.42572
rplJ	ribosomal L10 family protein	0	0	0	0	0	-0.500183	-0.220602	0.867856	-0.946872	-0.493536
G4125	hypothetical protein	0	0	0	0	0	-0.923823	-0.001964	-0.429599	-0.313558	-0.282225
G4126	hypothetical protein	1	1	1	1	1	2.69228	2.48633	1.22227	3.02434	3.0163
G4127	putative signal peptide containing protein	0	0	0	0	-1	0.558996	0.269848	0.0282302	1.00693	-1.04197
G4128	hypothetical protein	0	0	0	0	0	-0.440679	-0.836655	-0.592856	-0.453352	-0.651836
G4129	lipocalin-like domain protein	0	0	0	0	1	1.30244	0.415538	-0.179527	1.41691	1.5418
G4130	HIT domain protein	0	0	0	0	0	-0.28065	0.211214	-0.0220181	-0.123012	-0.588143
G4131	hypothetical protein	0	0	0	0	0	-0.734238	0.256686	-0.639849	0.642826	0.825328
ftsZ	cell division protein FtsZ	0	0	0	0	0	0.558089	0.673546	0.443598	0.0139372	0.904361
hpt	hypoxanthine phosphoribosyltransferase	-1	0	0	0	0	-1.69925	0.239782	0.00130562	-0.852086	-0.926542
G4134	hypothetical protein	0	0	0	0	0	-1.05815	-0.549835	-0.0961293	-0.676033	-0.249571
nadE	NAD synthetase	0	0	0	0	0	0.952924	0.518588	0.842368	0.00536057	0.768895
G4136	yceI-like domain protein	0	0	0	0	1	1.37813	0.622076	0.558124	0.719235	1.46706
pilC	type II secretion system (T2SS), F family protein	-1	0	0	-1	0	-1.33536	-0.352103	-0.61652	-3.31402	-0.702759
G4138	putative ddrR	0	0	0	0	0	-0.275409	0.182543	-0.484946	-0.17774	0.884323
ompR	transcriptional regulatory protein ompR	0	0	0	0	0	0.298778	-0.0444768	-0.569688	-0.270012	0.780051
miaE	putative tRNA-(Ms(2)io(6)a)-hydroxylase	0	0	0	0	0	-0.870667	0.183918	0.0591696	-0.560492	-0.40736
fdx	ferredoxin, 2Fe-2S type, ISC system	-1	0	0	0	0	-1.29201	0.33193	0.0566032	-0.749966	-0.567081
brnQ	branched-chain amino acid transport system II carrier protein	0	0	0	0	0	-1.05691	-0.843687	-0.0299084	-0.809589	-0.366291
G4145	hypothetical protein	-1	0	0	0	0	-1.78972	-0.801118	-0.20998	-1.45033	-1.55804
G4146	hypothetical protein	1	0	0	0	1	1.48774	0.725942	0.527647	0.370229	1.32375
G4147	adenosine deaminase	0	0	0	0	0	-0.978049	-0.5724	-0.430266	-0.87029	-0.50128
G4148	NAD-dependent glycerol-3-phosphate dehydrogenase family protein	1	0	1	0	1	1.95739	0.92831	1.27515	0.386888	1.53186
cyoA	ubiquinol oxidase, subunit II	0	0	0	0	0	-0.884169	-0.318395	0.0104535	-0.66574	0.667529
G415	signal peptide protein, YSIRK family	0	0	0	-1	0	-0.731458	-0.292857	-0.310521	-3.47384	-0.000691192
G4150	rieske domain protein	0	0	0	0	0	-0.823769	-0.0760999	-0.318334	-0.175914	-0.463811
rpsH	30S ribosomal protein S8	0	0	0	0	0	-1.02221	-0.0932614	0.340299	-0.852024	0.168121
G4152	membrane fusogenic activity family protein	0	0	0	0	0	-0.586811	-0.39213	-0.543673	-0.079902	-0.877715
G4153	bacterial regulatory helix-turn-helix , lysR family protein	0	0	0	0	0	-0.605165	-0.0259399	-0.600881	0.54782	-0.371707
rpmG	ribosomal protein L33	-1	0	0	0	0	-1.88605	0.74371	0.881183	-0.262102	-0.834986
sthA	soluble pyridine nucleotide transhydrogenase	0	0	0	0	0	0.270676	0.182915	0.27699	-0.279356	0.581932
G4156	ABC1 family protein	1	0	0	0	0	1.13207	-0.0704202	0.00880859	-0.292481	0.881772
tenA	thiaminase II	0	0	0	0	0	-0.39929	-0.535455	-0.239673	-0.00146621	-0.210561
G4158	carbonic anhydrase family protein	-1	0	-1	0	0	-2.31116	-0.871825	-2.03525	-1.47325	-0.810183
nfuA	fe/S biogenesis protein nfuA	0	0	0	0	0	-0.29685	0.391904	-0.430541	-0.838397	-0.478754
G4160	type I secretion membrane fusion , HlyD family protein	0	0	0	0	0	-0.184695	0.270779	-0.446333	-0.467384	0.215853
ispH	4-hydroxy-3-methylbut-2-enyl diphosphate reductase	0	0	0	0	0	0.00597169	0.0523531	0.358262	-0.0112579	0.263645
fadD	AMP-binding enzyme family protein	0	0	0	0	0	0.747255	0.639386	0.829224	-0.154477	-0.332336
G4163	hypothetical protein	0	0	-1	0	0	-1.09423	-0.314421	-1.06977	0.186037	-0.465855
G4164	spoU rRNA Methylase family protein	0	0	0	0	0	-0.772228	0.139962	0.0143052	0.0558674	-0.0129065
G4165	marC integral membrane family protein	0	0	0	0	0	0.763657	0.292441	0.517372	0.685205	0.756884
G4166	putative rND type efflux pump	0	0	0	0	0	-0.975495	-0.692251	0.0798274	-0.241116	-0.644914
infB	translation initiation factor IF-2	0	0	0	0	0	-0.952235	-0.3035	-0.213815	-0.539725	-0.444974
G4168	thioesterase superfamily protein	0	1	0	0	0	0.500172	1.09462	0.170257	0.294904	0.608305
bpeB	RND transporter, hydrophobe/amphiphile efflux-1 family protein	0	1	0	0	1	-0.116577	1.16816	0.144351	-0.313441	1.6044
G417	META domain protein	0	0	0	0	1	0.0781435	0.411522	-0.0899956	1.16434	1.40764
panD	aspartate 1-decarboxylase	-1	0	-1	0	0	-1.97537	-0.0108998	-1.08382	-1.04784	-0.729423
smpB	ssrA-binding protein	0	0	0	0	0	-0.837573	0.421762	-0.303098	-0.243292	0.0264497
G4172	H symporter family protein	0	0	0	0	0	0.0293686	0.22231	0.582376	0.228253	-0.132337
G4173	helix-turn-helix family protein	0	0	0	0	0	0.60003	0.883917	0.17025	0.693159	0.777698
G4174	putative iacB	0	0	0	0	0	0.00582148	-0.0740357	-1.24135	1.25399	0.0052115
G4175	nfeD-like partner-binding domain protein	1	0	0	0	0	2.65869	0.831373	0.224653	0.753433	0.173028
clpS	ATP-dependent Clp protease adaptor ClpS family protein	0	0	0	0	0	1.00989	0.0723289	0.430293	0.318245	0.781013
G4177	mce related family protein	1	0	0	0	1	2.20111	0.438078	0.471825	1.03603	2.139
G4178	hypothetical protein	1	0	1	0	0	1.94556	0.633367	1.34806	1.07462	-0.394684
ilvC	ketol-acid reductoisomerase	0	0	0	0	0	-0.394113	0.708292	0.404152	-0.254294	-0.00977293
baeS	HAMP domain protein	1	1	1	1	1	3.96254	1.89827	2.53741	3.03379	3.19584
G4180	tRNA threonylcarbamoyl adenosine modification protein, Sua5/YciO/YrdC/YwlC family	0	0	0	0	0	0.541261	0.493585	-0.0551701	0.551748	0.627028
gstB	glutathione S-transferase GST-6.0	0	0	0	0	0	1.19076	-0.465431	0.284326	0.242529	0.193123
hisZ	ATP phosphoribosyltransferase, regulatory subunit	0	0	0	0	0	-0.583391	0.122974	0.45083	-0.222457	-0.298356
G4183	hypothetical protein	1	1	1	1	0	2.66161	1.46171	1.44978	2.52305	-0.242087
G4184	putative membrane protein	0	-1	0	1	0	-0.369961	-1.24211	-0.0662657	1.9405	-0.646592
gidB	16S rRNA (guanine(527)-N(7))-methyltransferase GidB	0	0	0	0	0	-0.898027	-0.656008	0.217752	-0.586879	-0.192559
sdhA	succinate dehydrogenase, flavoprotein subunit	0	0	0	0	0	-0.812149	0.290112	0.10078	-1.26832	0.630718
G4187	asnC family protein	0	-1	0	0	0	-0.410708	-1.19381	-0.400851	-0.292805	-0.418041
G4188	bacterial regulatory s, luxR family protein	0	0	0	0	0	-0.70497	-0.160385	-0.476107	0.461636	-0.375909
prs	ribose-phosphate diphosphokinase family protein	-1	0	0	0	-1	-1.64758	-0.563151	-0.351889	-0.948043	-1.3359
G419	acetyltransferase family protein	1	0	0	1	0	1.91771	0.551093	0.704458	2.02539	0.0388632
cmk	cytidylate kinase	0	0	0	0	0	-0.925716	-0.354666	-0.0570577	-0.767825	0.423445
G4191	amino acid permease family protein	-1	0	0	1	-1	-1.62397	0.909428	0.446741	1.82022	-1.19639
G4192	hypothetical protein	1	0	1	0	0	1.90226	0.468887	1.32154	-0.0217742	0.136556
rpsR	ribosomal protein S18	-1	0	0	0	0	-1.82733	-0.690534	-0.271347	-1.29783	-0.186799
G4194	flavinator of succinate dehydrogenase family protein	-1	0	-1	0	0	-2.48822	-0.464932	-1.66007	-1.03186	0.169652
G4195	AFG1-like ATPase family protein	-1	0	0	0	-1	-1.11735	-0.989078	-0.824549	-0.798885	-1.11943
G4196	dctM-like transporters family protein	-1	0	0	0	0	-1.97192	-0.415165	-0.196581	-0.689914	-0.133086
csrA	carbon storage regulator	0	0	0	0	0	-0.907882	-0.00362853	-0.292993	0.00966352	-0.134195
mtgA	monofunctional biosynthetic peptidoglycan transglycosylase	0	0	0	0	0	0.458479	0.247554	-0.0880319	0.212576	0.48824
G4199	hypothetical protein	1	1	0	0	0	1.59729	1.29979	0.689963	1.0475	0.99112
rlmB	23S rRNA (guanosine-2'-O-)-methyltransferase RlmB	0	0	0	0	0	-1.0134	-0.387395	-0.339337	-0.152291	-0.515483
tig	trigger factor	0	0	0	0	0	-0.52768	-0.372927	0.310023	-1.18501	-0.143494
G4202	hypothetical protein	0	0	0	0	0	0.806484	0.207795	0.0880244	0.381336	-0.289835
rpsM	30S ribosomal protein S13	0	0	0	0	0	-1.18423	-0.486323	-0.433536	-1.15276	-0.104938
tal	transaldolase	1	0	1	0	1	2.72026	0.710237	1.36892	1.34158	1.47843
G4205	alpha/beta hydrolase family protein	0	0	0	0	0	0.437082	-0.28526	0.0767449	0.551233	-0.214621
holC	DNA polymerase III chi subunit, HolC family protein	0	0	0	0	0	0.551994	0.328417	0.410567	0.652478	-0.240159
G4207	hypothetical protein	1	1	0	1	1	1.71374	2.90327	0.269736	2.93521	1.99877
rpmB	ribosomal protein L28	-1	-1	-1	0	0	-2.58011	-1.33452	-1.10884	-1.55811	-0.375742
G4209	slyX family protein	0	0	0	0	0	-0.222377	-0.416851	0.191252	0.203078	-0.34839
G421	hypothetical protein	0	0	0	0	0	-0.47772	-0.808752	0.0130141	0.558145	0.306522
G4210	low molecular weight phosphotyrosine phosphatase family protein	0	0	0	0	0	-0.781614	-0.485438	-0.0294817	-0.14444	-0.444185
nuoN	proton-translocating NADH-quinone oxidoreductase, chain N family protein	0	0	0	0	0	-0.48967	0.220853	-0.0431701	-0.599187	0.857879
G4212	hypothetical protein	0	0	0	0	0	0.765474	0.468962	0.144144	0.739945	0.427357
G4213	molybdenum cofactor synthesis domain protein	1	0	0	0	0	1.1899	0.340772	0.844742	0.377989	0.114348
G4214	hypothetical protein	0	0	0	0	0	0.515009	0.11576	-0.153278	0.390951	0.501025
trpA	tryptophan synthase, alpha subunit	0	-1	-1	0	0	-0.971761	-1.61976	-1.2002	-1.25172	-0.987384
G4216	bacterial regulatory s, tetR family protein	1	1	0	0	1	1.53053	1.57098	0.40386	1.38313	2.4672
ftsA	cell division protein FtsA	0	0	0	0	0	0.59077	0.444053	0.712213	-0.0402997	0.0244452
leuB	3-isopropylmalate dehydrogenase	0	0	0	0	0	-0.487784	-0.273377	-0.624271	-0.553944	-0.0223412
G4219	hypothetical protein	-1	0	-1	0	0	-1.5129	0.0332627	-1.0826	-0.415838	-0.950921
G4220	MAPEG family protein	0	0	-1	0	0	-0.681617	-0.606535	-1.01509	-0.288408	-0.277581
G4221	homoserine dehydrogenase, NAD binding domain protein	0	0	1	0	0	0.891104	0.327149	1.37604	0.414891	-0.231099
G4222	hypothetical protein	-1	0	0	0	0	-1.26299	-0.088548	-0.776278	-1.18826	0.349439
G4223	gram-negative porin family protein	0	0	0	0	0	0.990309	0.824748	0.570616	0.210416	0.623881
G4224	putative permease YjgP/YjgQ family protein	0	0	0	0	0	0.498282	0.439852	0.523773	0.471169	0.734532
purC	phosphoribosylaminoimidazolesuccinocarboxamide synthase	0	0	0	0	0	-0.536797	-0.213175	0.075985	-0.0278528	0.186618
G4228	acetyltransferase family protein	0	0	0	0	0	0.328733	-0.0233159	0.379706	0.432953	0.19055
G4229	ATPase associated with various cellular activities family protein	0	0	0	0	0	0.429125	0.0559331	0.242111	0.311571	0.554793
G4230	universal stress family protein	0	0	0	0	0	-0.447564	0.43349	-0.361188	0.271127	-0.465677
G4231	lamB/YcsF family protein	0	0	0	0	0	0.836059	0.44624	0.466527	0.222562	-0.0389896
G4232	hypothetical protein	1	1	1	1	1	4.00724	3.69195	3.25189	4.86311	6.81128
G4233	hypothetical protein	0	0	0	0	0	-0.855934	-0.109365	-0.29455	-0.294432	-0.282203
G4234	ABC-2 type transporter family protein	-1	0	0	0	0	-1.33377	-0.341203	-0.0376271	-0.567703	-0.589556
G4235	hypothetical protein	0	0	0	0	0	0.203542	0.246856	-0.0716285	-0.0529703	0.132038
G4236	adenylate kinase family protein	-1	0	0	0	0	-1.11024	0.0294272	-0.435258	-1.21198	0.138719
G4237	acetyltransferase family protein	1	1	0	0	1	1.21834	1.11964	0.74441	1.16235	1.23725
G4238	hypothetical protein	0	0	0	0	0	0.371436	0.979106	0.237247	-0.0985403	0.832005
pyrH	UMP kinase	0	0	0	0	0	-0.855947	-0.755755	0.0569231	-0.94055	0.147814
G424	voltage gated chloride channel family protein	0	0	0	0	0	0.908278	0.174639	0.410424	1.59594	-0.509819
pcaG	protocatechuate 3,4-dioxygenase, alpha subunit	0	0	0	0	0	0.177932	0.737495	-0.147757	-0.212085	-0.356587
erpA	iron-sulfur cluster assembly accessory family protein	-1	0	0	0	0	-1.34291	0.0036663	-0.618281	0.140738	-0.26836
G4242	NAD binding domain of 6-phosphogluconate dehydrogenase family protein	1	0	1	0	0	1.13286	0.0384703	1.17789	0.885027	0.920622
hupB	DNA-binding protein HU-beta	0	0	0	0	0	-0.902394	0.0059996	0.218257	-0.832405	0.489798
guaB	inosine-5'-monophosphate dehydrogenase	0	0	0	0	0	-0.617365	-0.470508	0.0720159	-0.222151	-0.108282
G4245	bacterial Transmembrane Pair family protein	0	0	0	1	0	0.342194	-0.466065	0.61253	1.55422	0.351274
G4246	pilus assembly , PilO family protein	0	0	0	-1	-1	-1.01522	-0.928582	0.348588	-3.10541	-1.63048
G4247	helix-turn-helix family protein	0	0	0	0	0	-0.0993947	-0.047451	-0.11393	0.395641	0.466523
cdsA	cytidylyltransferase family protein	0	0	0	0	0	-0.323781	-0.456967	0.70505	-0.334152	-0.513277
G4249	tim44-like domain protein	0	0	0	0	0	0.533515	0.958189	0.300941	0.668491	0.721395
G4250	hypothetical protein	0	-1	-1	0	0	-1.33737	-1.12854	-1.02391	-1.02496	-0.10816
nifU	nifU-like protein	0	0	0	0	0	0.517674	-0.0670603	0.273286	0.189224	-0.143766
ywrO	general stress protein 14	-1	0	-1	0	0	-1.32494	-0.788039	-1.21596	-0.715321	-0.544864
G4253	2OG-Fe(II) oxygenase superfamily protein	0	0	0	0	0	-0.595617	-0.413537	-0.686753	0.0138789	-0.162622
pobR	P-hydroxybenzoate hydroxylase transcriptional activator	0	0	0	0	0	-0.493772	-0.173176	0.134497	0.0939548	-0.304419
G4255	L,D-transpeptidase catalytic domain protein	0	0	0	0	0	0.603954	0.432456	-0.105971	-0.0947167	0.0336184
G4256	hypothetical protein	0	0	0	1	0	-0.67713	-0.65881	0.0477093	1.97895	-0.821063
G4257	bacterial regulatory helix-turn-helix , lysR family protein	0	0	0	0	0	-0.928122	-0.445391	-0.65963	-0.0522682	-0.275474
G4258	hypothetical protein	1	0	0	0	-1	1.79895	0.565087	0.793706	0.89962	-1.30663
G4259	glycine zipper family protein	1	1	1	0	1	2.9834	3.96578	3.90086	1.92242	6.81575
cyoB	cytochrome o ubiquinol oxidase, subunit I	0	0	0	0	0	-0.808146	-0.032095	-0.0849409	-0.529878	0.873013
dnaG	DNA primase	0	0	0	0	0	-0.580328	-0.119361	-0.303315	0.132815	-0.332116
G4262	outer membrane family protein	1	0	1	0	0	1.19153	0.0507024	1.05081	0.293862	0.534476
pyrD	dihydroorotate dehydrogenase	0	0	0	0	0	-0.462534	-0.0159436	0.0536443	-0.174979	-0.170372
nuoH	NADH dehydrogenase family protein	0	0	0	0	0	-0.370073	0.113371	0.406927	-0.345936	0.995476
serA	ACT domain protein	0	0	0	0	0	-0.744195	-0.0902775	-0.794507	-0.744729	0.302128
nudC	NUDIX domain protein	0	0	0	0	0	0.00808538	-0.153699	-0.154181	-0.639731	0.388696
G4267	bacterial regulatory s, gntR family protein	0	0	0	0	0	0.790658	0.0182585	0.926225	0.0307463	-0.352587
sodB	superoxide dismutase	0	0	0	0	1	0.595252	0.0907105	-0.0667219	-0.104604	1.21989
G4269	peptidase M23 family protein	0	0	0	0	0	0.196477	0.120329	0.230641	-0.909194	-0.0137348
rlmN	23S rRNA methyltransferase	0	0	0	0	0	-0.632748	-0.611033	-0.481553	-0.716737	-0.322206
putP	sodium/proline symporter	-1	0	0	0	0	-2.03348	-0.368976	0.193803	-0.540584	-0.909927
msrA	peptide-methionine (S)-S-oxide reductase	0	0	0	0	0	0.767074	0.395423	0.478031	0.355441	0.445113
G4273	hypothetical protein	1	0	0	1	-1	2.32012	0.609037	0.813461	2.3707	-1.13485
G4274	putative lipoprotein	-1	0	-1	0	0	-3.28121	-0.378157	-2.38646	-1.37797	-0.424192
rpmD	ribosomal protein L30	0	0	0	0	0	-0.874119	-0.132026	0.34699	-0.919975	0.0324081
G4276	ferredoxin--NADP reductase	-1	0	0	0	0	-1.89442	-0.642188	-0.724474	-1.51387	-0.509936
fabD	malonyl CoA-acyl carrier protein transacylase	-1	-1	-1	-1	-1	-2.22607	-2.6756	-2.39352	-1.88653	-1.97031
G4278	hypothetical protein	0	0	0	0	0	-0.374857	0.140567	-0.120167	0.195007	0.419913
ndk	nucleoside diphosphate kinase family protein	-1	0	0	0	0	-2.17811	-0.189957	-0.731468	-1.1218	0.0787261
G4280	putative lysine decarboxylase family protein	1	0	1	0	0	1.54947	0.09573	1.00304	0.231799	0.626878
G4281	acyltransferase family protein	-1	-1	-1	0	-1	-1.54207	-2.10732	-1.84395	-0.699853	-1.29045
G4285	HAMP domain protein	0	0	0	0	0	0.745985	0.160748	-0.527961	-0.129507	0.201037
rpsF	ribosomal protein S6	-1	0	0	0	0	-2.41591	-0.986349	-0.676638	-1.59526	-0.314188
asd	aspartate-semialdehyde dehydrogenase	-1	0	0	-1	0	-1.49897	-0.28309	-0.672811	-1.66923	-0.0309235
G4288	hypothetical protein	0	0	0	0	0	-0.551894	-0.467845	-0.806914	-0.494864	-0.193682
G4289	eamA-like transporter family protein	0	0	0	0	0	-0.315702	-0.0175698	-0.61307	-0.0397477	-0.00642176
G429	dnaJ domain protein	0	0	0	0	0	-0.0567798	0.35059	-0.142222	0.165262	0.0687772
atpI	ATP synthase I chain family protein	-1	-1	0	0	0	-1.95567	-1.19756	-0.219658	-0.862511	-0.501416
G4291	hypothetical protein	-1	0	0	0	1	-1.25707	0.561534	0.244048	-0.184388	1.20252
G4292	uvrD/REP helicase N-terminal domain protein	0	0	0	0	0	-0.411647	-0.0327485	-0.0288801	0.126559	-0.251252
tatA	twin arginine-targeting translocase, TatA/E family protein	0	0	0	0	0	-0.582063	-0.600293	-0.85403	0.0977475	1.19273
G4294	lysM domain protein	0	0	0	0	1	-0.249023	-0.00186623	-0.230472	0.417967	1.69102
G4295	hypothetical protein	0	0	-1	0	0	-0.926995	-0.271823	-1.26339	-0.157608	0.0331777
G4296	putative transposase	0	0	0	0	-1	0.175322	0.153562	0.591409	0.136623	-1.36167
lepA	GTP-binding protein LepA	0	0	0	0	0	-0.947323	-0.246638	0.34186	-0.5594	-0.546304
etfdh	electron transfer flavoprotein-ubiquinone oxidoreductase	0	1	0	0	0	-0.22534	1.11868	0.135057	-0.474105	0.845403
rpsE	ribosomal protein S5	0	0	0	0	0	-1.01318	-0.0266284	0.207997	-1.17812	0.320625
G4300	bacterial regulatory helix-turn-helix s, AraC family protein	0	0	0	0	0	0.664249	0.0338742	0.620141	0.558043	0.113364
G4301	hypothetical protein	0	0	0	0	0	-0.00849899	0.299531	0.0171855	0.654788	0.41381
uppP	undecaprenyl-diphosphatase UppP	0	0	0	0	0	0.275831	0.755586	0.911434	-0.297625	0.164422
G4303	bacterial regulatory helix-turn-helix , lysR family protein	0	0	0	0	0	-0.229417	-0.476747	0.379095	0.15329	-0.884553
G4304	poly-beta-1,6 N-acetyl-D-glucosamine synthase	0	0	0	0	0	-0.254523	0.27145	-0.056419	-0.0613846	-0.155772
G4305	hypothetical protein	1	1	1	0	1	2.02384	1.34797	1.59126	1.45599	2.04524
G4306	cell division FtsQ family protein	0	0	0	0	0	0.341941	-0.0637982	0.518451	0.234124	0.337805
G4307	CRS1 / YhbY domain protein	0	0	0	0	0	-1.13284	-0.140952	-0.40586	-0.33279	-0.202988
G4308	bacterial regulatory s, luxR family protein	0	0	0	0	0	0.542929	0.00801988	0.27324	0.503417	-0.914421
G4309	nitroreductase family protein	0	1	0	0	1	0.723726	1.05378	-0.284846	0.595849	1.93067
G431	hypothetical protein	0	0	0	0	0	0.403171	-0.551889	0.96328	0.766668	-0.933408
atpC	ATP synthase F1, epsilon subunit	0	0	0	0	0	-0.767924	0.124077	0.218203	-0.394048	0.302427
atpD	ATP synthase F1, beta subunit	0	0	0	0	0	-1.11771	0.132993	-0.22474	-0.749697	0.353677
G4312	hypothetical protein	0	0	0	0	0	-0.0856335	-0.736001	0.337175	-0.967803	-0.142544
G4313	hypothetical protein	0	0	0	0	0	0.23956	0.255568	0.167618	0.376935	0.541918
fabG	3-oxoacyl-[acyl-carrier-protein] reductase	0	-1	0	0	-1	-0.806023	-1.17605	-0.3527	-1.14812	-1.89825
G4315	hypothetical protein	0	0	1	0	0	0.615792	0.384559	1.14719	0.362723	-0.152884
G4316	transglycosylase associated family protein	1	1	0	1	1	1.98734	1.83109	0.215502	2.37996	2.23586
G4317	osmC-like family protein	0	0	0	0	0	-0.0948319	-0.110681	-0.663244	-0.499793	-0.0926583
G4318	ion channel family protein	0	0	0	0	0	0.847393	0.511097	-0.255142	0.778464	0.954163
G4319	DNA-binding regulatory , YebC/PmpR family protein	0	0	0	0	0	-0.954455	-0.118032	0.141187	-1.06916	0.521155
G4320	cation efflux family protein	0	0	0	0	0	-0.20348	-0.127911	-0.217594	-0.116134	-0.900841
rnt	ribonuclease T	0	0	0	0	0	0.339352	-0.0704387	0.319816	-0.124265	-0.194606
G4322	asnC family protein	0	0	0	0	0	-1.28906	-0.403612	-0.835226	0.422513	0.310287
G4323	malic enzyme, NAD binding domain protein	-1	0	0	0	0	-1.30038	-0.669159	-0.687825	-1.15946	-0.298409
rpmF	ribosomal protein L32	-1	0	0	0	0	-1.54352	0.510846	0.0909534	-0.947049	-0.267574
rplQ	ribosomal protein L17	0	0	0	0	0	-1.16293	0.479005	0.175822	-0.762655	-0.118261
ppiC	peptidyl-prolyl cis-trans isomerase C	0	0	0	0	0	-0.638352	-0.0650735	-0.171883	0.118516	-0.406103
G4327	hypothetical protein	0	0	0	0	0	-1.05563	0.0604072	0.0749376	-0.722162	-0.831736
dusC	dihydrouridine synthase family protein	-1	0	0	0	0	-1.63688	-0.594594	-0.287438	-0.324791	-0.9508
G4329	helix-turn-helix family protein	0	0	0	0	0	-1.01617	-0.672247	-0.702655	-0.290267	0.482076
G4330	YGGT family protein	-1	0	0	0	0	-1.15722	-0.0462078	-0.426433	-0.428141	-0.650667
G4331	mechanosensitive ion channel family protein	0	0	0	0	0	0.524134	0.844679	0.16221	0.382042	0.352407
ilvB	acetolactate synthase, large subunit, biosynthetic type	0	0	0	0	0	0.278184	-0.1996	-0.0285687	-0.24579	0.0131146
G4333	hypothetical protein	0	0	0	0	-1	0.394305	0.0465963	0.472691	0.666423	-1.17687
proC	pyrroline-5-carboxylate reductase	0	0	0	0	0	-0.868284	0.298007	-0.0674218	-0.0956001	-0.669293
G4335	patatin-like phospholipase family protein	0	0	0	0	0	0.103373	-0.400548	0.0359195	-0.846778	0.716594
fba	fructose-bisphosphate aldolase, class II, Calvin cycle subtype	0	0	0	0	1	-0.381398	0.397279	-0.283732	-0.238821	1.12638
gloA	lactoylglutathione lyase	0	0	0	0	0	-0.0788264	0.292657	0.331478	-0.0392357	0.771852
gpmI	2,3-bisphosphoglycerate-independent phosphoglycerate mutase	0	0	0	0	0	0.154735	0.0677346	0.328539	-0.363528	0.552386
etfB	electron transfer flavodomain protein	0	0	0	0	0	0.284553	0.765404	0.584802	-0.466693	0.788674
rutF	NAD(P)H-flavin reductase RutF	0	0	1	0	0	0.687041	0.758423	1.26162	0.3521	0.430729
G4341	hypothetical protein	0	0	0	0	0	0.28106	0.282386	0.159061	-0.317328	0.100717
G4342	universal stress family protein	1	0	0	0	1	1.89018	0.695284	0.563558	1.18318	1.08001
G4343	vacJ like lipofamily protein	0	0	0	0	0	-0.402121	-0.24579	-0.412858	-0.32763	0.445406
rpmC	ribosomal protein L29	0	0	0	0	0	-0.679499	-0.160807	0.205543	-0.76634	0.0789664
dgkA	prokaryotic diacylglycerol kinase family protein	0	0	0	0	0	-1.24957	0.772403	-0.245587	0.501704	0.127097
lspA	signal peptidase II	0	0	0	0	0	0.520895	0.119939	-0.259654	0.0145683	0.278611
nrdR	transcriptional regulator NrdR	0	0	0	0	0	0.281785	0.301381	0.0236738	0.153043	0.403404
G4348	hypothetical protein	-1	0	0	0	0	-1.38756	-0.710774	-0.695829	-0.499643	-0.529492
rplL	ribosomal protein L7/L12	0	0	0	0	0	-0.696207	-0.31177	0.315983	-1.11604	-0.329386
cda1	polysaccharide deacetylase family protein	0	-1	0	0	0	-0.144911	-1.23945	-0.620892	-0.260817	0.315804
trxB	thioredoxin-disulfide reductase	0	0	0	0	0	0.411185	0.0636457	0.370118	-0.0765646	0.435841
G4354	hypothetical protein	1	1	1	1	1	5.64221	5.4487	3.53597	5.52002	3.86834
hcaR	hca operon transcriptional activator	0	0	0	0	0	-0.585954	-0.631748	-0.82614	-0.420457	-0.628666
dapD	2,3,4,5-tetrahydropyridine-2,6-dicarboxylate N-succinyltransferase	0	0	0	0	0	-1.06972	-0.69564	-0.160581	-1.21969	-0.0352347
G4357	bacterial regulatory helix-turn-helix s, AraC family protein	0	0	0	0	0	0.696004	-0.0242247	0.2169	0.923069	-0.307674
nuoJ	NADH-quinone oxidoreductase subunit J	0	0	0	0	0	-0.412179	0.344983	0.317217	-0.120929	0.976284
G4359	D-alanine--D-alanine ligase family protein	0	0	0	0	0	0.494466	0.100924	0.443638	0.124996	0.673833
G436	tonB-dependent siderophore receptor family protein	0	0	-1	0	0	-0.57038	-0.585031	-1.23709	0.269252	-0.900769
sucB	dihydrolipoyllysine-residue succinyltransferase	0	0	0	0	1	0.0132417	-0.214871	0.152865	-1.15886	1.1461
psiE	phosphate-starvation-inducible E family protein	1	0	0	0	0	1.72716	0.807291	0.460068	0.907045	0.819477
G4362	hypothetical protein	0	0	0	0	0	-0.144944	0.211157	-0.404943	0.61685	-0.863826
G4363	rieske domain protein	0	0	0	0	0	0.834257	0.201565	0.477455	-0.30265	-0.0882952
G4364	hypothetical protein	0	0	0	0	1	0.774789	-0.177079	-0.0719457	-0.133528	1.10411
G4365	hypothetical protein	0	0	0	0	0	1.06254	0.01798	0.359724	-0.238071	-0.0780302
aroQ	3-dehydroquinate dehydratase, type II	-1	-1	-1	0	-1	-1.57806	-3.17459	-2.50966	-1.08241	-2.63848
mreC	rod shape-determining protein MreC	0	0	0	0	0	-0.925078	0.0880281	-0.0534052	-0.82335	-0.325972
cspG	'Cold-shock' DNA-binding domain protein	0	0	0	0	0	-0.122851	-0.963863	0.425454	-0.327856	-0.254748
paaK	2Fe-2S iron-sulfur cluster binding domain protein	0	0	0	0	0	0.195973	0.215456	0.24032	-0.852842	-1.44911
G4372	eamA-like transporter family protein	0	0	0	0	0	-0.2576	-0.03705	-0.308218	0.125219	-0.707205
G4373	universal stress family protein	0	0	0	0	0	0.801439	0.167395	0.139696	0.582533	0.428644
G4374	putative endoribonuclease L-PSP	0	0	0	0	0	-0.211272	-0.385259	-0.721792	-0.642857	0.0496493
G4375	AIG2-like family protein	0	0	0	0	0	0.00632097	-0.835356	-0.1034	-0.84939	-0.369025
G4376	thioesterase superfamily protein	0	0	0	0	0	-0.291765	0.0515788	-0.272434	-0.140138	-0.080726
G4377	outer membrane beta-barrel domain protein	-1	0	0	0	0	-1.96306	-0.25075	-0.679539	-0.987745	-0.0650759
pilG	response regulator	-1	0	0	-1	0	-2.05581	-0.696027	-0.0409646	-3.4625	-0.537597
G4379	endonuclease related to archaeal Holliday junction resolvase family protein	0	0	0	0	0	-0.425386	-0.083761	0.166198	0.26522	-0.683643
ispB	polyprenyl synthetase family protein	0	0	0	0	0	0.0709831	-0.331009	0.270578	0.115615	-0.126533
G4385	hemerythrin-like metal-binding domain protein	0	-1	0	0	0	-0.38303	-1.2183	0.909012	-1.05079	-0.374183
G4386	putative exodeoxyribonuclease VII small subunit	1	1	0	0	0	1.57795	1.74974	0.331192	0.73342	0.596671
G4387	PBP superfamily domain protein	0	0	0	0	0	0.374733	-0.0923619	0.147903	0.102437	0.513607
G4388	osmC-like family protein	0	0	0	0	0	0.958134	0.529067	0.86294	0.602729	0.533801
rpoZ	DNA-directed RNA polymerase, omega subunit	-1	0	0	0	0	-1.207	-0.162739	-0.661496	-0.764426	-0.218687
G439	hupE / UreJ family protein	0	0	0	0	0	0.632649	0.376423	0.0725326	0.23214	-0.0622629
G4390	dienelactone hydrolase family protein	0	0	0	0	0	0.727408	0.610182	0.0500161	0.321089	0.162649
tusE	sulfur relay , TusE/DsrC/DsvC family protein	-1	0	0	0	0	-1.24291	-0.221702	-0.624641	-0.527717	-0.525537
G4392	glutamate/Leucine/Phenylalanine/Valine dehydrogenase family protein	0	0	0	0	0	0.959832	-0.256104	0.348312	-0.238055	0.340654
G4393	hypothetical protein	0	0	0	0	0	0.756552	-0.438237	2.57586	1.12239	0.568254
G4394	motA/TolQ/ExbB proton channel family protein	0	0	0	0	0	0.0115621	0.15155	0.483457	-0.761352	-0.79672
gcvH	glycine cleavage system H protein	-1	0	0	0	0	-1.37697	-0.69526	-0.856414	-0.800143	-0.451615
G4396	AMP-binding enzyme family protein	1	1	0	1	0	1.18532	1.29452	0.797971	1.85628	-0.682393
G4397	hypothetical protein	1	1	1	1	1	4.56049	3.38155	3.03927	3.99309	4.5795
minC	septum site-determining protein MinC	0	0	0	0	0	0.148825	0.338739	0.732777	0.396765	0.281161
secB	protein-export chaperone SecB	0	0	0	0	0	0.0591233	0.279484	0.155698	-0.846872	-0.149212
mlaB	STAS domain protein	1	1	1	1	1	3.34112	3.68879	2.13611	1.94752	2.98918
G4401	amino acid permease family protein	0	0	0	0	0	0.602099	0.229159	0.638114	0.890842	-0.182601
G4402	ribosomal protein L31	1	1	0	1	0	2.96298	1.04718	0.94114	1.80136	0.959493
ureA	urease, gamma subunit	0	0	0	0	0	-0.757485	0.0626582	0.716654	0.00979036	-0.437378
acnB	aconitate hydratase 2	0	0	0	0	0	0.670537	0.470756	0.811172	-0.424332	0.793981
rplW	50S ribosomal protein L23	-1	0	0	0	0	-1.31769	-0.356629	-0.00367049	-0.992776	-0.154835
cgtA	obg family GTPase CgtA	0	0	0	0	0	-0.125018	-0.702162	0.533487	-0.454113	0.440416
atpB	ATP synthase F0, A subunit	-1	0	0	0	0	-1.99867	-0.781346	-0.854042	-1.34369	0.134574
panC	pantoate--beta-alanine ligase	0	0	0	0	0	0.390844	0.363627	0.691019	-0.0950035	-0.251704
madM	malonate transporter, MadM subunit	0	0	0	0	0	1.04981	0.0709763	-0.209453	0.603858	-0.952982
G4412	lipoprotein	1	1	0	1	1	1.33865	1.01084	0.133815	2.09799	3.21795
thiS	thiamine biosynthesis protein ThiS	0	0	0	0	0	0.253041	-0.908777	-0.200536	-0.512161	0.00120389
nusB	transcription antitermination factor NusB	0	0	0	0	0	-1.06368	0.404447	0.143773	-0.522923	-0.109999
G4415	hypothetical protein	0	0	0	0	-1	-0.291711	-0.159397	-0.0169402	-0.0371952	-1.04139
ribH	6,7-dimethyl-8-ribityllumazine synthase	0	0	0	0	0	-0.726216	0.0812749	0.333668	-0.518942	-0.131908
cysE	serine O-acetyltransferase	0	0	0	0	0	-0.866203	-0.453728	-0.183674	-0.298408	-0.440476
G4420	scpA/B family protein	-1	0	0	0	0	-1.42047	-0.625884	-0.572419	0.230139	-0.873708
msrB	methionine-R-sulfoxide reductase	1	0	0	0	1	1.4436	0.405366	0.607189	0.408154	1.23015
G4422	hypothetical protein	0	-1	0	1	-1	0.501806	-1.58512	0.840354	1.92158	-1.37686
G4423	hypothetical protein	0	0	0	0	0	-0.736942	0.0506049	0.302483	-0.35284	-0.62052
G4424	hypothetical protein	1	1	0	1	0	1.4984	1.5426	0.0915969	1.82832	0.575599
G4425	hypothetical protein	0	0	0	0	0	-0.371721	-0.260944	0	0.226875	-0.604651
hutU	urocanate hydratase	-1	-1	-1	0	0	-2.98702	-2.90797	-1.82731	-0.372336	-0.683898
G4427	glycine zipper family protein	1	1	1	1	1	2.12004	1.95721	1.53259	2.03496	3.26886
panB	3-methyl-2-oxobutanoate hydroxymethyltransferase	0	0	0	0	0	-0.248091	0.185431	0.217432	-0.472862	-0.259698
glyA2	serine hydroxymethyltransferase 2	0	0	0	0	0	-1.07369	0.0232336	-0.439661	-0.689776	0.0532952
G4430	hypothetical protein	1	1	0	1	0	2.03231	1.80437	0.596884	2.36934	0.806732
G4431	bacterial transcriptional regulator family protein	0	0	0	0	0	-0.739098	-0.123922	-0.260719	0.0792745	0.0124943
ohrB	peroxiredoxin, Ohr subfamily protein	0	0	0	0	0	-0.160121	-0.642283	-0.402152	0.0281504	0.498715
ahpC	peroxiredoxin	0	0	0	0	1	0.549269	-0.182627	-0.984449	-0.27885	1.17129
rplN	ribosomal protein L14	-1	0	0	0	0	-1.28302	-0.362158	-0.0214353	-1.1609	-0.250519
G4437	polyketide cyclase / dehydrase and lipid transport family protein	0	0	0	0	0	0.730394	-0.104801	-0.0316226	0.636939	0.699688
G4438	yceG-like family protein	0	0	0	0	0	0.123177	-0.166497	0.725744	-0.25782	-0.339751
G4439	hypothetical protein	1	0	0	1	1	1.85108	0.859278	-0.167578	2.17513	1.75563
gltK	amino ABC transporter, permease , 3-TM region, His/Glu/Gln/Arg/opine family domain protein	0	0	0	0	-1	0.352741	0.817897	0.418161	-0.0282653	-1.1727
G4441	phenylacetic acid degradation-related protein	0	0	0	0	0	-0.386744	-0.507799	-0.254076	0.321446	-0.960129
G4442	BON domain protein	1	0	0	0	1	1.58351	0.824512	0.686111	0.446795	1.87874
G4443	KTSC domain protein	0	1	0	1	0	0.831238	1.67229	0.143194	1.86763	0.340336
G4444	lipopolysaccharide-assembly, LptC-related family protein	1	0	1	0	0	1.30738	0.389222	1.0472	0.623945	0.888419
glcB	malate synthase G	1	0	1	0	1	1.54768	0.867136	1.31908	0.294088	1.04254
mscL	large conductance mechanosensitive channel protein	0	0	0	1	0	0.884507	-0.132594	-0.392099	1.56051	0.830112
fur	ferric uptake regulation protein	0	0	0	0	0	-0.0773457	-0.444041	0.0656412	-0.560093	-0.764972
G4448	hypothetical protein	-1	0	0	0	0	-2.00671	0.158778	-0.0819426	-0.994444	-0.495129
upp	uracil phosphoribosyltransferase	-1	-1	0	0	0	-1.62067	-1.1433	-0.804758	-1.06817	-0.134475
lipL	beta-lactamase family protein	0	1	1	0	0	0.898995	1.0299	1.05071	0.839743	0.387328
G4450	methionine aminopeptidase, type I	0	0	0	0	0	-0.490087	0.189156	0.0977989	-0.423174	0.833873
ispE	4-(cytidine 5'-diphospho)-2-C-methyl-D-erythritol kinase	0	0	0	0	0	0.034208	0.229195	0.212778	-0.442603	-0.894043
G4452	lrgA family protein	0	0	0	0	0	-0.00281138	0.262948	-0.350715	0.467624	0.429171
G4453	bacterial transcriptional regulator family protein	-1	0	0	0	0	-1.12495	0.130118	-0.741676	-0.175505	0.329795
rpsK	30S ribosomal protein S11	0	0	0	0	0	-0.726031	-0.0937674	0.371112	-0.789055	-0.0470825
G4455	FAD binding domain protein	0	0	0	0	0	-1.05558	0.110515	-0.0641596	-0.581411	-0.0882836
typA	GTP-binding protein TypA/BipA	-1	0	0	0	0	-1.64939	-0.695725	0.269236	-1.42508	-0.489136
G4457	flavodoxin, WrbA-like protein	0	0	0	0	0	-0.305986	-0.00984626	-0.390295	-0.218966	0.842895
def	peptide deformylase	0	0	0	0	0	-0.374336	0.0843808	0.0160932	-0.989112	-0.473716
coaBC	phosphopantothenoylcysteine decarboxylase / phosphopantothenate--cysteine ligase	-1	0	-1	0	0	-1.39244	-0.727618	-1.29093	-0.630405	-0.264989
G4460	hypothetical protein	0	0	0	0	0	-0.537009	0.404918	-0.520617	-0.403657	0.167471
G4461	ABC transporter family protein	0	0	0	0	0	1.06391	0.0231096	0.288541	0.179818	0.206151
G4462	hypothetical protein	0	0	0	1	1	0.0199564	-0.500133	-0.817077	2.23901	1.55005
G4463	efflux pump membrane family protein	0	0	0	0	1	-0.218399	0.586356	0.28898	0.314438	2.02491
G4464	short chain dehydrogenase family protein	0	0	0	0	0	-0.324682	0.038253	-0.922919	-0.129927	0.859642
G4465	NUDIX domain protein	0	0	0	0	0	-0.818632	-0.298551	-0.428581	-0.0712178	-0.276889
mltB	lytic murein transglycosylase B	1	0	0	0	0	1.25503	0.209288	0.712211	1.07302	0.49667
bfr	bacterioferritin	1	1	1	1	0	2.13233	1.11245	3.49267	2.85198	-0.18925
G4468	putative signal peptide containing protein	0	0	-1	0	0	-0.545121	-0.763493	-1.09182	-0.0504427	0.336156
rpoA	DNA-directed RNA polymerase, alpha subunit	0	0	0	0	0	-0.860035	0.202118	0.0805164	-0.769864	-0.17417
rplU	ribosomal protein L21	-1	0	0	-1	0	-2.30501	-0.785232	-0.84064	-1.97	-0.215825
phoB	phosphate regulon transcriptional regulatory protein PhoB	0	0	0	0	0	0.787178	0.371917	0.0471263	0.131198	0.171028
G4472	biopolymer transport ExbD/TolR family protein	-1	0	-1	-1	0	-1.61459	-0.0739522	-2.53384	-1.82187	-0.11409
G4473	phnA family protein	0	0	0	0	-1	-0.842226	-0.266791	0.227967	-0.161987	-1.10183
tyrS	tyrosine--tRNA ligase	0	0	0	0	0	-0.252747	-0.375872	-0.0402954	-0.657888	-0.1344
dapC	succinyldiaminopimelate transaminase	0	0	0	0	0	-0.543181	-0.168481	-0.184978	-0.00823379	0.0294147
G4476	hypothetical protein	1	0	1	0	0	1.94694	0.486623	1.05935	2.08007	0.489137
G4477	hypothetical protein	0	0	0	1	1	1.43874	0.872089	0.0733046	1.93626	1.36061
pnp	polyribonucleotide nucleotidyltransferase	0	0	0	0	0	-0.123675	-0.128557	0.884286	-0.29732	-0.178112
holA	DNA polymerase III, delta subunit	0	0	0	0	0	-0.107078	0.126585	-0.116962	0.3243	-0.180304
cydB	cytochrome d ubiquinol oxidase, subunit II	0	1	0	0	0	0.428319	1.14743	-0.109884	-0.656709	0.905514
G4481	competence-damaged family protein	1	0	0	0	0	1.67824	0.798465	0.886531	1.10664	0.213194
rubA	rubredoxin	0	0	0	0	0	-0.42378	-0.206608	-0.116757	-0.882599	0.317663
G4483	hypothetical protein	0	0	0	0	0	-0.649921	-0.532141	0.1162	-0.591049	-0.890915
atpG	ATP synthase F1, gamma subunit	0	0	0	0	0	-0.957369	-0.157784	0.10823	-0.770104	0.317643
G4487	response regulator	0	0	0	-1	0	-0.628713	-0.214394	0.50662	-3.11932	-0.538487
accC	acetyl-CoA carboxylase, biotin carboxylase subunit	-1	-1	-1	0	-1	-1.57398	-1.89064	-2.03437	-1.26563	-1.84636
pyrB	aspartate carbamoyltransferase	0	0	0	0	0	-1.27254	-0.585329	-0.733978	-0.581389	-0.156564
G449	tonB-dependent siderophore receptor family protein	0	0	0	0	0	-0.00533593	-0.0767063	-0.805122	-0.0677931	-0.0164058
G4490	bacterial regulatory , arsR family protein	0	0	0	0	0	-0.430572	0.104655	0.94408	-0.315217	-0.168458
rpsB	ribosomal protein S2	-1	0	0	0	0	-1.14059	-0.234635	0.153685	-0.789582	-0.29821
G4492	hypothetical protein	-1	0	-1	0	0	-1.71528	-0.976167	-1.64774	-0.712825	0.431212
G4493	type VI secretion system effector, Hcp1 family protein	0	0	0	0	0	-0.32388	0.2314	0.22899	-0.378636	0.0588251
G4494	diguanylate cyclase domain protein	0	0	0	0	0	-0.700488	-0.15818	-0.762046	0.479062	-0.502416
G4495	yaeQ family protein	-1	-1	0	0	0	-1.53736	-1.00059	0.155414	-1.5087	-0.636582
dcd	deoxycytidine triphosphate deaminase	-1	0	0	0	0	-1.75084	-0.347588	-0.542028	-1.08557	-0.636172
rpsT	ribosomal protein S20	-1	-1	-1	-1	0	-3.01569	-1.34712	-1.1375	-2.00416	-0.240867
ffh	signal recognition particle protein	0	0	0	0	0	0.157093	-0.0395219	0.322197	-0.765438	0.253739
G4501	smpA / OmlA family protein	0	0	0	0	0	0.346941	-0.586869	-0.0057012	0.205844	0.239143
coq7	2-nonaprenyl-3-methyl-6-methoxy-1,4-benzoquinol hydroxylase	0	0	0	0	0	0.0349853	0.45829	0.17858	0.413082	0.311475
G4503	transporter, betaine/carnitine/choline transporter family protein	0	0	0	0	0	-0.825817	-0.655167	-0.678792	-0.0993983	-0.55583
G4504	hypothetical protein	0	0	0	0	0	-0.737659	-0.19192	-0.50048	-0.213937	0.354761
rplI	ribosomal protein L9	-1	0	0	0	0	-1.61655	-0.622423	-0.176143	-1.19151	-0.00132076
G4506	hypothetical protein	0	0	0	0	0	0.751268	-0.15417	-0.128596	0.365392	0.787031
G4507	pilus assembly , PilP family protein	-1	0	0	-1	0	-1.56645	-0.777218	-0.0837677	-3.03765	-1.26638
engA	ribosome-associated GTPase EngA	0	0	0	0	0	0.368498	-0.438097	0.856264	-0.32109	-0.507537
prmB	protein-(glutamine-N5) methyltransferase, ribosomal protein L3-specific	0	0	0	0	-1	-0.870326	0.0489765	0.334795	-0.553244	-1.10925
G451	bacterial regulatory helix-turn-helix s, AraC family protein	1	0	0	0	0	1.38754	0.628857	0.15666	1.0267	0.00362624
G4510	hypothetical protein	0	0	0	0	-1	0.287991	-0.562953	0.951665	-0.312356	-1.43679
recA	protein RecA	1	0	1	0	0	1.38195	-0.0069872	1.02958	-0.103498	0.00289233
G4512	lysozyme family protein	0	0	0	0	0	0.497692	0.284141	0.716692	0.295027	-0.253968
atpF	ATP synthase F0, B subunit	-1	0	0	0	0	-1.46778	-0.431254	-0.191525	-1.36425	0.45656
G4514	hypothetical protein	1	0	0	0	0	1.08518	-0.288946	-0.206217	0.186549	0.950375
G4515	bacterial regulatory helix-turn-helix s, AraC family protein	0	0	0	0	0	0.264674	0.387195	0.379089	0.499314	-0.0676268
rpmI	ribosomal protein L35	-1	0	0	0	0	-2.89391	-0.0870323	-0.567612	-0.463783	0.120447
G4517	fructose-1-6-bisphosphatase family protein	0	-1	0	0	0	-0.762009	-1.30823	0.301117	-0.665295	0.36594
G4518	bacterial regulatory helix-turn-helix , lysR family protein	0	0	0	0	0	-0.327891	0.233188	0.109435	-0.347835	-0.114716
G4519	hopJ type III effector family protein	-1	0	-1	0	0	-1.78501	-0.061138	-1.06402	-1.10138	-0.372838
G4520	hypothetical protein	0	0	0	0	0	0.130269	-0.82702	-0.287336	-0.535716	-0.144058
bigR	bacterial regulatory , arsR family protein	-1	-1	-1	0	-1	-2.13646	-2.05309	-1.40278	-1.05856	-1.20245
pheA	chorismate mutase	0	0	0	0	0	-0.22618	-0.0758669	0.261919	-0.416722	0.274852
G4523	cupin domain protein	0	0	0	0	0	1.08408	0.68883	0.638822	0.115077	-0.0976058
dhaT	iron-containing alcohol dehydrogenase family protein	1	0	1	1	0	1.24761	0.372639	1.35866	1.88195	-0.279561
G4525	lemA family protein	0	0	0	0	1	-0.102667	0.241969	0.0389429	0.501467	1.71974
ubiA	4-hydroxybenzoate polyprenyl transferase	0	0	0	0	0	-0.716536	-0.451543	-0.729069	-0.749433	-0.219148
G4527	putative enoyl-CoA hydratase/isomerase	1	1	0	0	1	1.57079	1.55498	0.558578	1.23275	1.30199
hisH	imidazole glycerol phosphate synthase, glutamine amidotransferase subunit	0	0	0	0	0	-0.471029	-0.0205568	0.104269	-0.807303	-0.375311
G4529	dicarboxylate symporter family protein	0	0	0	0	0	-0.767108	0.256087	0.145345	-0.0410663	-0.111433
G453	cation diffusion facilitator transporter family protein	0	0	0	0	0	-0.258284	-0.662486	-0.277454	0.0874656	-0.0500955
G4530	CBS domain protein	0	0	0	0	0	0.644351	-0.0202591	0.181587	-0.0432011	0.661985
G4531	hypothetical protein	0	0	0	0	0	0.493421	-0.342702	-0.220446	0.44488	0.491033
G4532	bacterial regulatory s, gntR family protein	0	0	0	0	0	0.374533	0.473302	0.211922	0.460351	0.449059
G4533	response regulator	0	0	0	0	0	-0.77158	-0.509827	-0.797664	-0.442014	0.284782
G4534	telomere recombination family protein	0	0	0	0	0	-0.419991	-0.1226	-0.200281	-0.0701679	0.291069
G4535	hypothetical protein	0	0	0	0	0	0.465331	0.352829	0.298119	0.260376	-0.0720706
purB	adenylosuccinate lyase	-1	0	0	0	0	-1.25456	-0.89177	-0.139318	-1.47983	-0.2232
fbp	FKBP-type peptidyl-prolyl cis-trans isomerase family protein	0	1	0	0	1	0.815438	1.18178	0.776929	0.436458	1.16742
G4538	hypothetical protein	0	0	0	0	0	0.289354	-0.738392	0.0952054	-0.428337	0.212476
G4539	hypothetical protein	-1	0	-1	0	0	-1.61751	-0.855659	-2.20888	-0.0832773	-0.808581
G454	putative rND type efflux pump	0	0	0	0	0	-0.188751	0.240083	0.0457777	0.354291	-0.420565
G4540	marR family protein	0	0	0	0	0	-0.283906	0.617222	0.224834	-0.0212644	-0.059961
G4541	hypothetical protein	0	0	0	0	0	-0.36468	0.361043	0.0900529	0.223211	0.0533707
infA	translation initiation factor IF-1	-1	-1	-1	-1	0	-2.61227	-1.30343	-1.11442	-2.37778	-0.821999
G4543	hypothetical protein	0	0	0	0	0	-0.378274	-0.315677	-0.52129	0.203517	0.15421
htpX	peptidase M48 family protein	0	0	0	0	1	0.0489379	0.720029	-0.0259836	-0.113292	1.07646
ispF	2-C-methyl-D-erythritol 2,4-cyclodiphosphate synthase	0	0	0	0	0	-0.694885	-0.140652	0.107327	-0.380185	-0.223297
G4546	3-demethylubiquinone-9 3-methyltransferase family protein	1	1	0	1	1	2.01726	1.53098	0.97107	2.6167	1.80708
G4547	SCP-2 sterol transfer family protein	0	0	0	0	0	0.991068	0.0226148	0.0164719	-0.404392	0.596398
G4548	hypothetical protein	0	0	0	0	0	-0.080742	-0.0304592	-0.74582	0.331044	-0.810274
G4549	bacterial regulatory helix-turn-helix , lysR family protein	0	0	0	0	0	-0.650741	-0.6146	-0.524095	-0.0994418	-0.26842
G4550	hypothetical protein	-1	0	0	0	0	-1.91287	-0.646794	-0.950496	-0.408906	0.00697632
gspI	type II secretion system protein I	0	0	0	0	0	0.42037	0.0070986	0.159964	0.240168	-0.520202
rrmJ	ftsJ-like methyltransferase family protein	0	0	0	0	0	0.536277	0.301762	0.713926	-0.0320392	0.674677
thiG	thiazole synthase	0	0	0	0	0	0.101416	-0.204515	-0.0198471	-0.620435	0.338162
G4554	ATP-NAD kinase family protein	0	0	0	0	0	0.0556944	0.393924	-0.118847	0.23606	0.211137
hisG	ATP phosphoribosyltransferase	0	0	0	0	0	-0.0145006	0.107261	0.450989	-0.342795	-0.268739
G4560	tRNA threonylcarbamoyl adenosine modification protein YgjD	0	0	0	0	0	-0.685365	-0.462688	0.00368716	-0.689871	-0.0595417
gatC	aspartyl/glutamyl-tRNA(Asn/Gln) amidotransferase, C subunit	0	0	0	0	0	-0.81497	-0.337508	0.00536452	-0.503511	-0.182187
G4562	hypothetical protein	1	1	1	0	1	2.17395	1.78711	1.04365	0.95069	2.2234
G4563	carboxymuconolactone decarboxylase family protein	0	0	0	0	0	-0.240399	0.222009	-0.5664	0.257884	-0.296209
ftsW	cell division protein FtsW	0	0	0	0	0	0.387311	0.466215	0.0977269	0.223377	0.73184
G4567	ABC transporter family protein	0	0	0	0	0	-1.01504	-0.219655	0.212754	-0.318214	-0.487931
nuoB	NADH-quinone oxidoreductase subunit B	0	0	0	0	0	-0.691162	0.195331	0.241528	-0.396221	0.501159
clpX	ATP-dependent Clp protease, ATP-binding subunit ClpX	0	0	1	0	0	1.39182	0.854783	1.33884	0.432438	0.411115
prfA	peptide chain release factor 1	0	0	0	0	0	-1.04091	-0.306537	-0.164576	-0.616468	-0.169235
pilT	twitching mobility protein	0	0	0	-1	0	-0.955461	0.153959	-0.259093	-3.44646	-0.477241
rluC	pseudouridine synthase, RluA family protein	0	0	0	0	0	-0.243994	-0.134071	0.201757	0.140705	-0.352094
acr1	fatty acyl-CoA reductase	1	0	1	0	-1	1.48087	0.905494	1.81915	0.518557	-1.11087
rplO	ribosomal protein L15	0	0	0	0	0	-0.722367	-0.189827	0.370631	-1.14776	0.284958
rplX	ribosomal protein L24	0	0	0	0	0	-0.871202	-0.0937375	0.116212	-0.752381	-0.193472
surE	5'/3'-nucleotidase SurE	0	0	0	0	0	-0.675486	-0.552563	-0.654449	-0.292131	-0.18031
G4577	putative deoxyguanosinetriphosphate triphosphohydrolase	0	0	0	0	0	0.618245	-0.213428	0.0676857	0.0788441	-0.285462
G4578	hypothetical protein	0	0	0	0	0	-0.17051	-0.122202	-0.25609	1.25129	-0.689917
hda	dnaA regulatory inactivator Hda	0	0	0	0	0	0.114759	0.132659	0.173073	0.658524	-0.105073
G4580	calcineurin-like phosphoesterase family protein	0	0	0	0	0	-0.453819	-0.0878768	-0.212691	-0.350094	-0.438899
kdsA	3-deoxy-8-phosphooctulonate synthase	0	0	0	0	0	-0.358971	-0.399083	0.506521	-0.73569	-0.125628
G4587	maoC like domain protein	0	0	0	0	0	0.34477	0.0638474	-0.00709085	-0.0429536	0.120231
rlmH	rRNA large subunit m3Psi methyltransferase RlmH	0	-1	-1	0	0	-1.22689	-1.35862	-1.08704	-1.04065	-0.150396
coaE	dephospho-CoA kinase	0	0	0	-1	0	-0.772705	-0.283957	-0.727002	-1.82738	-0.855806
G4590	chromate transporter family protein	0	0	-1	0	0	0.0648485	-0.413007	-1.23553	-0.171959	0.444426
G4591	hypothetical protein	0	0	0	0	0	-0.46072	0.250836	-0.574439	0.757007	0.203282
G4592	hypothetical protein	0	0	0	0	0	0.570663	-0.656942	-0.361595	-0.33911	0.572272
rplR	ribosomal protein L18	0	0	0	0	0	-0.855406	-0.121562	0.292112	-1.10802	0.213812
pcaI	3-oxoadipate CoA-transferase subunit A	0	0	0	0	0	0.740075	0.382674	-0.418655	1.30182	0.835623
G4595	hypothetical protein	1	1	0	0	1	2.86365	1.06025	1.49965	1.42266	2.65932
G4596	hypothetical protein	1	1	0	1	1	2.16036	1.97079	-0.664446	3.09746	3.48235
rhtC	threonine efflux protein	0	0	0	0	0	-0.776709	0.308521	-0.901488	-0.149982	0.650415
aspS	aspartate--tRNA ligase	0	0	0	0	0	0.172931	0.142407	0.127014	-0.281324	-0.336748
pstC	phosphate ABC transporter, permease protein PstC	0	0	0	0	0	-0.0568761	-0.0305668	0.0416079	-0.523438	0.2935
G460	siderophore-interacting FAD-binding domain protein	0	0	-1	0	0	0.429129	0.270753	-2.43924	-0.838173	0.427066
G4600	hypothetical protein	0	0	0	0	0	0.225921	0.176261	-0.436922	0.54734	0.642907
atpE	ATP synthase F0, C subunit	-1	0	-1	0	0	-2.29279	-0.911088	-1.64389	-1.0541	0.13316
phoU	phosphate transport system regulatory protein PhoU	0	0	0	0	0	-0.393641	0.437261	-0.0632322	-0.222661	-0.214109
rpsO	ribosomal protein S15	-1	0	-1	0	0	-2.59225	-0.593507	-1.08633	-0.926105	0.149978
G4604	hypothetical protein	0	0	0	0	0	-0.57415	-0.734212	-0.9703	-0.39213	0.15265
G4605	putative membrane protein	0	0	0	0	0	0.121138	0.736084	-0.00468719	0.489053	-0.447795
secF	protein-export membrane protein SecF	0	0	0	0	0	-0.423102	-0.0268489	-0.362736	-0.341387	0.613362
rpsG	ribosomal protein S7	0	0	0	0	0	-0.595495	-0.160868	0.546407	-0.847366	0.201266
mdh	malate dehydrogenase	0	0	0	0	0	-0.923317	0.341986	-0.130833	-0.377938	0.869249
G4609	hypothetical protein	0	0	0	0	0	-0.751254	-0.49751	0.118608	-0.775463	-0.453137
iscS	cysteine desulfurase IscS	0	0	0	0	0	-0.469745	-0.33767	-0.108652	-0.788367	-0.270903
G4611	merR regulatory family protein	0	0	0	0	0	0.0229423	-0.769152	-0.77728	-0.548599	-0.316941
fadA	acetyl-CoA C-acyltransferase FadA	1	1	1	0	1	2.01895	1.58875	1.248	0.705569	1.79002
G4613	carbon-nitrogen hydrolase family protein	0	0	0	0	0	0.123306	0.50497	0.52211	0.0119056	-0.370344
G4614	hypothetical protein	1	1	0	1	1	1.54903	4.47344	0.882605	3.27297	2.32056
G4615	hypothetical protein	0	0	0	0	0	0.944312	0.948367	0.270277	0.499985	-0.357445
G4616	hypothetical protein	0	-1	0	-1	0	-0.724584	-1.21506	-0.66118	-1.54575	0.163499
G462	lysE type translocator family protein	0	0	0	0	0	-0.639494	-0.876215	-0.378281	0.253314	-0.190287
ilvN	acetolactate synthase, small subunit	0	0	1	0	0	0.870292	0.119187	1.08024	0.158941	-0.19248
greA	transcription elongation factor greA	0	0	0	0	0	-0.430809	-0.505511	0.241876	-0.549691	-0.407815
G4624	hypothetical protein	0	0	0	0	0	-0.773942	-0.391331	-0.367733	-0.253523	0.613146
G4625	motA/TolQ/ExbB proton channel family protein	0	0	0	0	0	-0.0376394	0.337292	-0.370384	-0.41661	-0.224764
G4626	bacterial regulatory helix-turn-helix s, AraC family protein	0	0	0	0	0	-0.348394	-0.461153	-0.772681	0.302034	-0.436186
G4627	acetyl-CoA C-acetyltransferase family protein	0	1	0	0	0	0.95898	2.16267	0.693869	1.323	0.220253
G4631	short chain dehydrogenase family protein	0	0	0	0	0	-0.116333	0.817792	-0.0361292	0.652937	-0.476747
folC	bifunctional protein folC	0	0	0	0	0	-0.430629	-0.821753	-0.985143	-0.761815	-0.720296
est	alpha/beta hydrolase fold family protein	0	0	0	0	0	0.5146	-0.423503	-0.0970941	0.641365	0.543126
G4634	hypothetical protein	0	0	0	0	1	0.412893	-0.0483028	-0.550259	1.30166	1.00354
G4635	binding--dependent transport system inner membrane component family protein	0	0	0	0	0	-0.0398091	-0.023428	0.313192	0.0828481	-0.357781
clpP	ATP-dependent Clp endopeptidase, proteolytic subunit ClpP	0	0	0	0	0	0.768511	0.588688	0.731033	-0.202697	0.444884
anmK	anhydro-N-acetylmuramic acid kinase	0	0	0	0	0	-0.0584879	0.0860505	0.101561	0.310678	0.855684
hslO	hsp33 family protein	0	0	0	0	0	0.901812	0.563927	0.716907	0.188995	0.125394
parE	DNA topoisomerase IV, B subunit	0	0	0	0	0	0.671647	-0.0588894	0.516488	-0.291972	0.0860739
G464	FMN-dependent oxidoreductase, nitrilotriacetate monooxygenase family protein	0	0	0	0	0	-0.565883	0.218355	-0.576779	0.0268052	-0.337189
G4643	ABC transporter family protein	-1	-1	0	0	0	-1.604	-1.20299	-0.820505	-0.768298	-0.549916
madL	malonate transporter, MadL subunit	0	0	0	0	0	0.498744	-0.148992	0.507701	1.06035	0.171417
G4645	hypothetical protein	0	0	0	0	0	-0.232621	-0.499688	-0.902255	0.368018	-0.700469
rplV	ribosomal protein L22	0	0	0	0	0	-0.989812	-0.454661	-0.0595133	-1.0526	0.0512431
G4647	6-pyruvoyl tetrahydropterin synthase family protein	1	0	0	0	1	1.53273	-0.115937	-0.447861	0.595267	1.58373
G4648	putative membrane protein	0	0	0	0	0	-0.0939028	0.382169	-0.212412	0.288157	-1.00638
G4649	short chain dehydrogenase family protein	0	0	0	0	0	-0.754348	-0.245948	-0.313302	0.329832	-0.95551
G4650	neutral zinc metallopeptidase family protein	0	0	0	0	0	0.704541	-0.245553	-0.420231	0.264238	0.779662
G4651	H antiporter-2 family protein	0	0	0	0	0	0.40258	0.551447	0.0177034	0.8925	-0.80645
G4652	methylmalonate-semialdehyde dehydrogenase	0	0	0	0	0	0.502264	0.329511	0.642751	0.725006	0.10788
uraH	hydroxyisourate hydrolase	0	0	0	0	0	1.17301	-0.0400015	0.685115	0.639701	-0.68143
G4654	phosphoribosyl transferase domain protein	0	0	0	0	0	0.0844332	-0.0736491	-0.334582	-0.100963	-0.206167
proS	proline--tRNA ligase	0	0	0	0	0	-0.925032	-0.907762	-0.759237	-0.919569	-0.0234439
G4662	bacterial regulatory s, tetR family protein	0	0	0	0	0	-1.02799	-0.765221	0.0445426	0.027107	-0.900839
rplS	ribosomal protein L19	0	0	0	0	0	-1.19076	-0.0282217	0.428054	-0.489134	-0.580861
fadB	fatty oxidation complex, alpha subunit FadB	1	1	1	0	1	2.05455	2.05405	1.39322	0.627249	1.64589
G4665	hypothetical protein	0	0	0	0	0	-0.283994	-0.329583	-0.491937	-0.272327	0.028158
leuD	3-isopropylmalate dehydratase, small subunit	0	0	0	0	0	0.0731673	0.145085	0.247538	-0.0243164	-0.423101
glsA	glutaminase A	0	0	0	0	0	-0.687157	-0.698944	-0.606947	-0.445422	-0.675443
ssuD	alkanesulfonate monooxygenase, FMNH(2)-dependent	0	0	0	0	0	0.589391	0.823005	0.170025	0.91475	0.270583
waaA	3-Deoxy-D-manno-octulosonic-acid transferase family protein	0	0	0	0	0	0.620434	0.0778703	0.370659	0.205277	0.475706
G4670	glutathione S-transferase, N-terminal domain protein	0	1	0	0	0	0.728869	1.11312	0.5851	0.286145	0.464788
G4671	acyl-CoA dehydrogenase, C-terminal domain protein	0	0	0	0	0	0.218835	0.268521	0.257509	-0.426078	-0.0914215
G4672	short chain dehydrogenase family protein	1	0	0	0	0	1.32638	0.786251	0.682928	0.175604	-0.0399071
G4673	efflux transporter, RND family, MFP subunit	0	0	0	0	1	1.01864	0.482463	0.178149	0.507763	1.98655
cueR	cu(I)-responsive transcriptional regulator	0	0	0	0	0	0.102306	0.533462	0.291694	0.573746	0.0689255
G4677	alpha/beta hydrolase family protein	0	0	0	0	1	0.368117	0.829503	0.753181	-0.172911	1.40217
G4678	bacterial regulatory helix-turn-helix s, AraC family protein	1	1	0	0	0	1.51246	1.10975	0.561196	0.761834	0.752336
G4679	his Kinase A domain protein	0	0	0	0	0	0.0704181	0.0352971	0.0812748	-0.0686055	-0.345873
G468	putative metal-dependent hydrolase family protein	0	0	0	0	0	0.293789	0.134569	-0.384096	0.268513	-0.0130407
G4680	polyphosphate kinase 2 family protein	1	0	0	0	1	1.6037	0.479754	0.544292	0.590377	1.04451
G4681	cobQ/CobB/MinD/ParA nucleotide binding domain protein	0	0	0	0	0	-0.593624	-0.751182	-0.821281	0.261259	-0.491031
G4686	4-hydroxyproline epimerase	0	0	0	0	0	0.126023	-0.839011	0.120625	0.330193	0.574631
ppx	ppx/GppA phosphatase family protein	-1	-1	0	0	0	-1.31903	-1.11589	-0.901853	-0.612822	-0.54622
G4688	acyl-CoA dehydrogenase, C-terminal domain protein	0	0	0	0	0	0.743421	0.931165	0.364682	0.48609	0.0275265
G4689	hypothetical protein	0	0	0	0	0	-0.069194	0.066167	-0.678004	0.115372	0.12341
proA	glutamate-5-semialdehyde dehydrogenase	0	0	0	0	0	-0.337778	0.252416	-0.47736	-0.00584659	0.132403
G4691	glyceraldehyde-3-phosphate dehydrogenase, type I	0	0	0	0	0	-0.824519	-0.25123	-0.0891677	-0.155653	-0.49828
G4692	sporulation related domain protein	0	0	0	0	0	0.106844	-0.288474	-0.155765	-0.0783394	0.126883
pth	peptidyl-tRNA hydrolase	0	0	0	0	-1	-0.972027	-0.706361	-0.422051	-0.865856	-1.16169
rplB	ribosomal protein L2	-1	0	0	0	0	-1.21645	-0.397952	-0.151359	-1.05447	0.136414
folD	tetrahydrofolate dehydrogenase/cyclohydrolase, catalytic domain protein	-1	0	-1	0	0	-1.61952	-0.904982	-1.06743	-1.0034	0.0849627
G4696	3,4-dihydroxy-2-butanone-4-phosphate synthase	0	0	0	0	-1	-0.0934272	0.712347	0.449829	1.0597	-1.0825
G4697	adenylate and Guanylate cyclase catalytic domain protein	0	0	0	0	0	0.00226372	0.125816	0.463074	0.0732814	-0.226825
G4698	bacterial regulatory helix-turn-helix , lysR family protein	0	0	0	0	0	0.161985	-0.484191	-0.261688	-0.487531	-0.264141
G4699	binding--dependent transport system inner membrane component family protein	0	0	0	0	0	-0.0473511	0.202868	0.185475	-0.563077	0.0315692
proY	amino acid permease family protein	-1	-1	0	0	-1	-1.75688	-1.01461	-0.595917	0.223397	-1.6652
miaB	tRNA-i(6)A37 thiotransferase enzyme MiaB	0	0	0	0	0	-1.03816	-0.319008	-0.249848	-0.326697	-0.572859
G4702	binding--dependent transport system inner membrane component family protein	0	0	0	0	0	0.479773	-0.060321	0.0852691	0.869461	0.601029
G4703	ribonuclease, Rne/Rng family domain protein	0	0	0	0	0	0.370188	0.268093	0.399823	-0.925029	-0.164227
G4704	HAD phosphoserine phosphatase-like hydrolase, IB family protein	0	0	0	0	0	0.637583	0.621303	0.0025224	0.702271	0.230645
G4705	bacterial regulatory helix-turn-helix , lysR family protein	0	0	0	0	0	-0.66512	0.609749	0.107516	0.0337308	-0.171298
G4706	aspartate kinase, monofunctional class	0	0	0	0	0	-0.316152	-0.247281	0.0810982	-1.17975	-0.375753
G4707	dienelactone hydrolase family protein	0	0	0	0	0	-0.630035	-0.174179	-0.572025	0.22844	-0.631664
G4708	binding--dependent transport system inner membrane component family protein	0	0	0	0	-1	1.14345	0.255066	0.204547	0.289458	-1.21395
G4709	kamA family protein	-1	0	0	0	0	-1.3902	-0.587483	-0.0736745	-0.891296	-0.381134
smc	chromosome segregation protein SMC	0	0	0	0	0	-0.161712	-0.708676	-0.108294	-0.474376	0.162739
G4711	mgtC family protein	0	0	0	0	0	0.1203	-0.0814491	-0.098039	0.0614726	-0.0943243
polA	DNA polymerase I	0	0	0	0	0	-0.226468	-0.0596252	0.339068	-0.234612	0.000926792
G4713	aldehyde dehydrogenase family protein	0	0	0	0	0	0.279156	0.467456	0.0370809	0.220743	1.07885
dhbA	2,3-dihydro-2,3-dihydroxybenzoate dehydrogenase	0	0	-1	0	0	-0.793182	-0.241667	-2.98969	-1.07943	-0.16834
thrS	threonine--tRNA ligase	0	0	0	0	0	-0.604096	-0.511629	0.070162	-0.493016	-0.649146
G4716	peptidase M16 inactive domain protein	0	0	0	0	0	0.320102	-0.0520676	0.03038	-0.377484	0.612695
astE	succinylglutamate desuccinylase	0	0	0	0	0	0.0873728	0.111921	-0.353952	-0.172933	-0.345079
G4718	ABC transporter family protein	0	0	0	0	0	0.315097	0.403452	-0.0828724	0.370109	0.0447621
G4719	radical SAM superfamily protein	0	0	0	0	0	-1.09067	-0.757607	-0.356806	-0.793563	-0.568349
G472	hypothetical protein	0	0	0	0	0	0.343864	-0.631554	0.0530721	-0.0250075	-0.206663
G4720	HAD hydrolase, IA, variant 1 family protein	0	0	0	0	0	0.345887	0.510917	0.408577	0.196928	0.641365
lrp	asnC family protein	0	0	0	0	-1	-0.568719	-0.120325	-0.226096	-0.176836	-1.41238
G4722	dctM-like transporters family protein	0	0	0	0	0	-0.0182687	0.181146	-0.150901	0.315719	-0.546085
G4723	lysE type translocator family protein	0	1	0	0	0	0.556375	1.20344	0.423755	0.817583	-0.200338
trmD	tRNA (guanine(37)-N(1))-methyltransferase	0	0	0	0	0	-1.10913	-0.469478	0.220559	-0.794088	-0.670336
G4725	C-terminal processing peptidase family protein	1	0	0	0	1	1.85817	0.859025	0.788837	0.941335	1.55187
purA	adenylosuccinate synthase	0	0	0	0	0	-0.983367	-0.0439363	-0.303577	-0.75231	0.300163
G473	periplasmic solute binding family protein	0	0	0	0	0	0.28843	-0.554208	0.218049	0.348441	-0.134571
modB	molybdate ABC transporter, permease protein	0	0	0	0	0	0.868444	0.495868	0.325368	0.722505	0.568957
G4731	hypothetical protein	0	0	0	0	1	0.414648	0.741251	0.523271	0.407632	2.26712
engD	GTP-dependent nucleic acid-binding protein engD	0	0	0	0	0	-1.67514	-0.83879	-0.360907	-1.35637	-0.434205
G4733	beta-lactamase family protein	0	0	0	0	0	0.0673623	0.392175	-0.199871	0.317922	-0.225982
G4734	sodium/hydrogen exchanger family protein	0	0	0	0	0	-0.398909	-0.202415	-0.935383	-0.447907	0.463302
G4735	fatty acid hydroxylase superfamily protein	0	0	0	0	0	-0.619051	0.0562638	-0.698521	0.834076	-0.35841
G4736	hypothetical protein	0	0	0	0	-1	-0.380249	-0.726464	0.348638	-0.730806	-1.49589
G4738	bacterial regulatory helix-turn-helix , lysR family protein	0	0	0	0	0	0.251185	-0.241455	0.185472	0.499101	-0.0412118
eno	phosphopyruvate hydratase	0	0	0	0	0	-0.609711	-0.585174	0.635504	-0.783018	0.0656063
G4740	lytic murein transglycosylase family protein	1	1	0	0	1	2.22705	1.01516	0.420484	0.724855	1.2035
dxs	1-deoxy-D-xylulose-5-phosphate synthase	0	0	0	0	0	-0.364828	0.66259	0.136932	0.132657	0.0870969
rraA	rraA family protein	0	0	0	0	0	-0.212463	0.0166041	-0.75816	-0.504714	0.903383
paaC	phenylacetic acid degradation protein paaC	0	1	0	0	0	0.164151	1.03185	0.213277	-0.41627	-1.09858
ygfZ	aminomethyltransferase folate-binding domain protein	0	0	0	0	0	-0.555393	-0.121997	-0.660405	-0.342383	0.57779
G4745	smr domain protein	0	0	0	0	0	-0.164215	-0.573102	-0.110106	-0.885558	-0.00574624
purT	phosphoribosylglycinamide formyltransferase 2	0	0	0	0	0	0.038932	-0.23601	-0.259782	-0.285075	0.469111
G4747	transcriptional regulator	0	0	0	0	0	-0.0321079	-0.0559512	0.211806	0.00976224	-0.0330017
G475	bestrophin, RFP-TM, chloride channel family protein	0	0	0	0	0	-0.435056	-0.397929	-0.466896	-0.534811	0.114578
G4754	bacterial regulatory helix-turn-helix , lysR family protein	-1	-1	-1	0	0	-1.09575	-1.05003	-1.51744	-1.02176	-0.905838
G4755	hydrolase, TatD family protein	0	0	0	0	0	0.530897	0.159909	0.771114	-0.573127	0.138841
G4756	impB/mucB/samB family protein	0	0	0	0	0	-0.331829	-0.432159	-0.163558	0.0757911	-0.908629
G4762	3-oxoadipyl-CoA thiolase	1	1	0	0	0	2.21971	1.13105	0.914518	1.22867	0.544557
kdsC	3-deoxy-D-manno-octulosonate 8-phosphate phosphatase, YrbI family protein	1	0	0	0	0	1.66308	0.253215	0.791027	0.415365	0.829231
G4764	lipoyl synthase	-1	0	-1	0	0	-1.11696	-0.329591	-1.04157	-0.174769	-0.0982824
G4765	hypothetical protein	0	0	0	0	0	-0.325425	0.517725	-0.172092	0.699454	-0.311263
G4766	putative pyrimidine permease RutG	-1	0	0	0	0	-2.34625	0.420831	-0.585633	-0.943388	-0.598475
pqqB	coenzyme PQQ biosynthesis protein B	1	0	0	0	0	1.12514	0.344809	0.907646	0.69825	0.518823
clpB	ATP-dependent chaperone protein ClpB	1	1	1	0	0	3.15484	1.42914	2.08999	1.11376	0.898272
G4769	enoyl-CoA hydratase/isomerase family protein	1	1	1	1	1	1.87413	2.38955	1.08497	1.47686	1.13984
G477	hypothetical protein	0	0	0	0	0	0.149316	0.802171	0.266722	1.34854	-0.801295
G4770	acyl-CoA dehydrogenase, N-terminal domain protein	0	0	0	0	0	-0.109379	-0.0758203	-0.92464	0.316481	-0.287323
G4771	SAM-dependent methyltransferase family protein	-1	-1	-1	0	0	-1.65257	-1.15035	-1.14116	-1.31205	-0.412819
metX	homoserine O-acetyltransferase	0	0	0	0	0	-0.373876	0.062146	-0.171595	-0.190071	-0.259461
G4773	bacterial transcriptional regulator family protein	0	0	0	0	0	-0.638322	-0.336341	-0.0181033	-0.337298	-0.017203
G4774	phosphoglucomutase/phosphomannomutase, C-terminal domain protein	1	0	0	0	1	1.56484	0.61226	0.619635	0.825791	1.28641
mraY	phospho-N-acetylmuramoyl-pentapeptide-transferase	0	0	0	0	0	0.354345	0.395061	0.881784	0.000667372	0.360589
emrE	small Multidrug Resistance family protein	0	0	0	0	0	-0.0134086	0.516166	-0.252482	0.499291	-0.809826
G4777	CBS domain protein	0	0	0	0	0	0.125435	0.810859	0.583178	0.31833	0.492086
G4778	putative esvE2	0	0	0	0	0	-0.153463	-0.696353	0.522966	-1.20887	-0.702477
ddc	L-2,4-diaminobutyrate decarboxylase	0	0	0	0	0	-0.214457	0.208234	0.208204	-0.912941	0.8979
G4780	glutathione S-transferase, C-terminal domain protein	0	0	0	0	0	0.058396	-0.672526	0.176502	0.658711	-0.576211
G4781	hypothetical protein	0	0	0	0	0	1.1724	0.584987	0.234275	-0.0727745	0.854258
G4782	ATP-NAD kinase family protein	0	0	0	0	1	1.06725	-0.240851	0.613102	1.29525	1.2566
dnaQ	DNA polymerase III, epsilon subunit	0	0	0	0	0	-0.11375	-0.354104	0.26153	0.216291	0.189079
G4784	bacterial transferase hexapeptide family protein	0	0	0	0	0	-0.149925	-0.073404	-0.407474	0.383736	-0.498434
G4785	branched-chain amino acid transport family protein	0	0	0	0	0	0.443661	-0.142631	0.164187	0.277992	1.04109
hflX	GTP-binding protein HflX	-1	0	-1	0	0	-1.37403	-0.985228	-1.15022	-0.136664	-0.523356
G4787	hypothetical protein	-1	-1	-1	0	0	-2.22122	-1.53246	-1.84787	-0.689561	-0.373346
G4788	glycosyl transferase 2 family protein	0	0	0	0	0	0.994068	0.985344	-0.11653	1.26486	0.596608
drgA	protein drgA	0	1	0	0	1	0.929419	1.07189	0.216901	0.639157	1.84611
safA	spore coat assembly SafA domain protein	1	0	0	0	0	1.5155	0.256296	0.809294	-0.1448	0.722318
G4790	bacterial regulatory s, gntR family protein	0	0	0	0	0	-0.39265	0.0436297	-0.714863	-0.234618	-0.0858073
G4791	dehydratase family protein	0	0	0	0	0	0.0420945	0.193905	0.280404	0.39709	-0.204595
G4792	hypothetical protein	0	0	0	0	0	-0.134208	0.00465702	0.0907537	0.430419	-0.362438
G4793	response regulator	1	0	0	1	1	2.90569	0.658412	0.99746	2.14074	2.121
G4794	putative lipoprotein-34	0	0	0	0	0	-0.248791	0.0599502	-0.680293	-0.219703	0.170536
rtcB	hypothetical protein	0	0	0	0	-1	0.237452	-0.46958	0.620132	-0.0190927	-1.27383
aspA	lyase family protein	0	-1	0	0	0	-0.712467	-1.33491	0.356913	-1.09084	0.643464
G4797	putative membrane protein	0	0	0	0	0	-0.231339	0.171693	-0.408032	0.498068	-0.097893
apaH	bis(5'-nucleosyl)-tetraphosphatase	0	0	0	0	0	-0.789106	-0.0137997	-0.16403	-0.150637	-0.657284
G4799	hypothetical protein	0	0	0	0	0	-0.312363	-0.592221	-0.0377015	-0.252973	-0.12919
gspE	type II secretion system protein E	0	0	0	0	0	0.108658	-0.369213	-0.345904	0.0730122	0.452614
gshA	glutamate--cysteine ligase	0	0	0	0	0	-0.441948	-0.133318	-0.387759	-0.104723	0.344637
G4805	hypothetical protein	0	0	0	0	1	0.467413	0.358615	-0.596616	0.822425	1.73731
G4806	histidine kinase family protein	0	0	0	0	0	-0.00811753	-6.422e-05	0.0251812	-0.264297	-0.29385
G4807	flavin oxidoreductase / NADH oxidase family protein	0	0	0	0	0	-0.539841	-0.00530451	0.423799	-0.386201	0.0119312
G4808	porin subfamily protein	0	0	0	0	-1	-0.528541	-0.725943	0.673171	-1.2169	-1.49274
G4809	outer membrane beta-barrel domain protein	0	0	0	0	0	-0.27554	0.619828	-0.350344	0.88567	0.0319322
G4811	neurotransmitter symporter family protein	0	0	0	0	0	0.688854	0.561255	0.790986	0.709902	-0.178778
G4812	drug resistance transporter, Bcr/CflA subfamily protein	0	0	0	0	0	-0.181896	0.4258	-0.156522	0.215941	0.4813
G4813	bacterial regulatory s, luxR family protein	0	0	0	0	0	-1.01351	-0.447414	-0.908766	0.217481	-0.573585
G4814	bacterial regulatory helix-turn-helix , lysR family protein	0	0	0	0	0	-0.0589671	-0.224899	-0.448431	-0.664737	0.054115
G4815	glutathione S-transferase, C-terminal domain protein	0	0	0	0	0	0.983834	0.316309	0.589264	0.192193	0.25247
G4816	eamA-like transporter family protein	0	0	0	0	0	0.152566	0.140902	0.318127	0.742465	0.0526167
G4817	spoU rRNA Methylase family protein	0	0	0	0	0	-1.40064	-0.1306	-0.0064124	-0.487149	-0.321939
G4818	hypothetical protein	0	0	0	0	0	-0.400083	0.0102382	-0.154653	-0.162522	-0.194528
clpV	type VI secretion ATPase, ClpV1 family	0	0	0	0	0	-0.0123019	-0.0787319	0.136328	-0.614762	0.0609177
argB	acetylglutamate kinase	0	0	0	0	1	0.475489	0.0101616	0.0242421	-0.37552	1.0665
G4821	short chain dehydrogenase family protein	1	1	1	1	1	2.20485	1.91406	1.35644	2.59917	2.03605
yrdA	protein YrdA	0	0	0	0	0	-0.862602	-0.864613	-0.353558	-0.460151	-0.626154
pcaF	3-oxoadipyl-CoA thiolase	0	0	0	0	0	0.146001	-0.163644	-0.548724	0.00733857	-0.281238
G4824	isocitrate lyase	1	1	1	0	1	1.84705	1.65377	1.32828	0.733228	1.24056
radA	DNA repair protein RadA	0	0	0	0	0	-0.209978	0.277413	-0.229177	0.0217878	0.0754255
G4826	phospholipase C, phosphocholine-specific	0	0	0	0	0	0.0189924	-0.178791	-0.238856	0.419133	-0.863699
G4827	NADPH-dependent FMN reductase family protein	0	0	0	0	1	-0.715453	0.208048	0.391114	-0.0891857	3.37086
G4828	aldehyde dehydrogenase family protein	0	0	0	0	0	0.804246	0.588497	0.655664	0.79031	0.227474
metI	binding--dependent transport system inner membrane component family protein	0	0	0	0	0	0.360598	0.521135	-0.229738	-0.152248	0.321624
nikE	nickel import ATP-binding protein NikE	0	0	0	0	0	0.44411	-0.0527802	0.365892	-0.128758	-0.55569
G4830	ompA family protein	0	1	0	1	1	0.670777	1.84799	0.158352	2.62754	2.65048
G4831	bacterial regulatory helix-turn-helix , lysR family protein	0	0	0	0	0	-0.0379442	0.133879	-0.183819	0.0732813	-0.231455
G4832	putative membrane protein	-1	0	0	0	0	-1.86395	-0.137422	-0.748629	-0.0425911	-0.580773
paaN	phenylacetic acid degradation protein paaN	0	0	0	0	0	0.724844	0.783313	0.244752	0.146954	-0.688393
atpA	ATP synthase F1, alpha subunit	0	0	0	0	0	-1.22041	-0.230924	-0.0574618	-1.0223	0.288571
G4835	malic enzyme, NAD binding domain protein	0	0	0	0	1	0.300317	0.623194	0.518964	-0.445163	1.12484
nadB	L-aspartate oxidase	0	0	0	0	0	-0.0681697	-0.515077	-0.856973	-0.387454	0.0817099
G4837	ferric iron reductase FhuF-like transporter family protein	0	0	0	0	0	0.674829	0.213822	-0.556793	0.887817	-0.330676
thrH	phosphoserine phosphatase/homoserine phosphotransferase bifunctional protein	0	0	-1	0	0	-0.949018	-0.87523	-1.08733	-1.14696	0.388356
sbcD	exonuclease SbcCD, D subunit	0	-1	-1	0	0	-0.706637	-1.11133	-1.12599	-0.354612	0.157195
pcaJ	3-oxoadipate CoA-transferase subunit B	0	0	0	0	0	-0.249625	-0.147133	0.503333	0.692718	0.146841
hutH	histidine ammonia-lyase	-1	-1	-1	0	-1	-2.80285	-1.57656	-1.65561	0.513127	-1.24754
ssb	single-stranded DNA-binding family protein	0	0	0	0	0	-0.744559	-0.698768	-0.058492	-0.678022	-0.355202
omp38	outer membrane protein omp38	0	0	0	0	0	-0.0332312	0.337038	-0.0357669	0.149651	0.934432
G4845	hypothetical protein	0	0	0	0	0	0.46379	-0.762885	-0.0729425	-0.0590004	0.0572281
iscR	rrf2 family protein	0	0	0	0	0	-0.83098	-0.342924	-0.737801	-0.119078	-0.303703
G4847	H symporter family protein	0	0	0	0	0	-0.734295	-0.717934	-0.964682	-0.251795	-0.573058
G4848	ABC transporter, substrate-binding , aliphatic sulfonates family protein	0	1	0	0	0	-0.654122	1.2378	-0.980494	1.43609	0.862758
G4849	succinate-semialdehyde dehydrogenase family protein	1	1	0	0	1	2.84674	1.81025	0.151756	1.18359	2.6041
trpS	tryptophan--tRNA ligase	0	0	0	0	0	-0.357171	-0.551216	-0.122047	-1.34105	0.0420548
G4851	isocitrate dehydrogenase, NADP-dependent	0	0	0	0	0	-0.0273823	-0.630418	-0.208535	-1.17384	0.598088
trpE	anthranilate synthase component I	0	0	0	0	0	-0.461119	-0.182178	-0.332931	-0.363591	0.187067
G4853	bacterial regulatory helix-turn-helix s, AraC family protein	0	0	0	0	0	-0.511089	-0.661016	-0.0653309	-0.0351477	0.358953
G4854	aldehyde dehydrogenase family protein	0	0	0	0	0	0.330821	0.758347	0.321743	0.169173	-0.210208
G4855	hypothetical protein	0	0	0	0	-1	-0.477688	-0.265639	-0.315361	0.411535	-1.49554
lldD	L-lactate dehydrogenase	0	0	0	0	0	0.111801	0.301557	0.83136	0.239791	0.861521
G4857	thioesterase-like superfamily protein	0	1	0	0	0	0.200718	1.24542	0.134367	0.488928	0.661933
rnfB	electron transport complex, RnfABCDGE type, B subunit	0	0	0	0	0	-1.56245	-0.593975	-0.0898367	-0.736247	-0.214137
rluB	pseudouridine synthase family protein	0	0	0	0	0	-0.372985	0.0590515	-0.372134	-0.600494	0.143847
G4860	helicase domain protein	-1	-1	0	0	0	-1.99787	-1.03114	-0.207936	-0.683283	-0.792711
mvaB	hydroxymethylglutaryl-CoA lyase	1	1	0	0	0	1.50339	1.4607	0.458306	0.880555	-1.0121
G4862	flagellin N-methylase family protein	-1	0	0	0	0	-1.45809	-0.53109	-0.351617	0.269087	-0.0408859
G4863	tonB-dependent siderophore receptor family protein	-1	-1	-1	0	0	-1.48797	-1.03897	-1.59622	-1.30911	-0.192192
argD	transaminase, acetylornithine/succinylornithine family protein	0	0	0	0	0	-1.17378	-0.204985	-0.48365	-1.02545	0.631194
ruvA	holliday junction DNA helicase RuvA	0	0	0	0	0	0.592807	0.442634	0.426449	0.167267	-0.237387
G4866	oxidoreductase, short chain dehydrogenase/reductase family	1	1	1	1	1	3.60031	3.15091	2.01458	3.43111	2.23448
G4867	type IV pilus assembly PilM family protein	-1	0	0	-1	-1	-1.2824	-0.235957	-0.0423763	-2.78119	-1.07803
dat	diaminobutyrate--2-oxoglutarate aminotransferase	0	0	0	0	0	0.403047	0.502519	0.738301	-0.568653	0.713989
G4869	nudix-type nucleoside diphosphatase, YffH/AdpP family protein	-1	0	-1	0	0	-1.7677	-0.844543	-1.314	-0.871364	-0.0363049
dapA	dihydrodipicolinate synthase	0	0	0	0	0	-0.274246	-0.497805	-0.432987	-0.268138	-0.290305
G4871	succinate-semialdehyde dehydrogenase [NADP ] GabD	0	0	0	0	0	-0.516306	0.0237114	-0.171701	0.0778569	-0.643695
G4872	putative coenzyme A transferase	1	0	1	0	0	1.53947	-0.673499	1.08383	1.11087	-0.550935
G4873	cheW-like domain protein	0	0	0	-1	0	-0.782883	0.257266	0.319372	-3.27994	-0.709474
pdxH	pyridoxamine 5'-phosphate oxidase	0	0	0	0	0	0.740151	0.336867	0.417511	0.406622	0.73411
leuS	leucine--tRNA ligase	0	0	0	0	0	-0.633252	-0.147134	0.171283	-0.56886	0.191358
G4876	rhomboid family protein	0	0	0	0	0	-1.07273	0.337055	-0.321028	0.261931	-0.327529
sucA	oxoglutarate dehydrogenase (succinyl-transferring), E1 component	0	0	0	0	0	0.467153	0.260022	0.292499	-0.606815	0.707522
ftsY	signal recognition particle-docking protein FtsY	0	0	0	0	0	-0.220297	-0.435449	0.615625	-0.338801	0.0136523
rluA	RNA pseudouridylate synthase family protein	0	0	0	0	0	-1.139	0.0763531	-0.400085	-0.0761833	-0.870353
G488	tonB-dependent siderophore receptor family protein	0	0	-1	0	0	-0.707365	-0.442916	-1.41797	-1.17488	0.0199402
G4880	ferric uptake regulator family protein	0	0	-1	0	0	-0.0537871	0.332891	-1.72729	0.112983	0.214648
G4881	efflux transporter, RND family, MFP subunit	0	0	1	0	1	0.114824	-0.860548	1.59096	0.633608	1.17724
G4882	aldehyde dehydrogenase family protein	0	-1	-1	0	0	-1.07106	-1.2756	-1.69196	-1.44183	-0.725064
G4883	H antiporter-2 family protein	0	0	0	0	0	0.566697	0.500871	0.03798	0.848496	0.707113
G4884	fatty acid desaturase family protein	-1	-1	-1	-1	-1	-3.05281	-2.67075	-2.1374	-2.66648	-1.05582
glnQ	ABC transporter family protein	0	0	0	0	-1	-0.111167	0.62642	0.838762	0.156756	-1.21686
dsdA	D-serine ammonia-lyase	0	0	0	0	1	0.370408	-0.720702	-0.621707	0.0833011	1.05932
G4887	type IV pilus biogenesis family protein	0	0	0	0	0	-0.349367	0.0369353	-0.0484964	-0.5998	0.137381
dut	deoxyuridine 5'-triphosphate nucleotidohydrolase	-1	0	0	0	0	-1.50022	-0.690846	-0.0569521	-1.50957	0.118261
lysA	diaminopimelate decarboxylase	0	0	1	0	0	0.632715	0.637159	1.00225	-0.131838	0.304589
G4890	nitroreductase family protein	1	0	1	0	1	1.95593	0.715827	1.28483	0.938549	1.54877
G4891	putative rND type efflux pump	0	0	0	0	0	0.212768	-0.036074	0.396706	-0.190139	-0.435324
G4892	putative enoyl-CoA hydratase/isomerase	1	0	0	0	1	1.50732	0.647096	-0.0266131	0.862613	1.7903
msuE	FMN reductase	0	0	0	0	0	-0.562725	0.933826	-0.158596	0.668462	0.0552676
G4894	thioredoxin	0	0	0	0	0	0.0358617	0.081508	-0.573815	-0.152515	0.0942088
yfiO	outer membrane assembly lipoYfiO family protein	0	0	0	0	0	0.826178	0.0708277	0.350064	-0.110206	0.891048
G4896	hypothetical protein	0	0	0	0	0	0.845041	0.656763	0.167618	0.409777	0.887078
G4897	methyltransferase domain protein	0	0	0	0	0	-0.487694	0.0582214	-0.0803009	-0.28201	-0.8939
fumC	fumarate hydratase, class II	1	1	0	0	1	2.11371	1.6036	0.22916	1.55228	2.03814
G4899	RND transporter, hydrophobe/amphiphile efflux-1 family protein	0	0	1	0	1	0.299531	-0.187236	1.93777	0.596752	1.29774
G4900	amidohydrolase family protein	1	0	0	0	0	1.26285	0.371326	-0.151076	0.884149	0.499824
pcnB	poly(A) polymerase family protein	0	0	0	0	0	-0.334068	-0.36119	-0.273936	-0.652451	-0.35196
G4902	amino acid permease family protein	-1	0	0	0	-1	-1.70466	0.203067	-0.229954	0.14193	-2.22732
lolA	outer membrane lipocarrier protein LolA	1	1	1	1	1	4.93739	3.67346	3.38049	3.90509	4.79144
G4904	major Facilitator Superfamily protein	0	0	0	0	0	-0.259998	0.139369	0.30386	0.677608	-0.675955
G4905	bacterial regulatory s, gntR family protein	1	0	1	1	0	1.16492	0.272321	1.41975	1.72912	0.908753
G4906	pyruvate decarboxylase isozyme 3	0	1	0	0	0	0.0476502	1.65485	-0.0962017	0.872673	-0.205733
G4907	hypothetical protein	0	0	0	0	0	-0.172655	0.524485	0.497637	-0.367748	-0.0688371
pgaC	poly-beta-1,6 N-acetyl-D-glucosamine synthase	1	1	1	0	1	2.11545	1.16484	1.89479	1.21336	3.4019
G4909	hypothetical protein	0	0	0	0	0	-0.249058	0.0175532	-0.0789659	0.0506019	0.0427629
yccS	integral membrane , YccS/YhfK family protein	0	0	0	0	0	0.00632963	-0.515601	-0.300713	0.0724159	0.391019
aqpZ	MIP channel s family protein	0	0	-1	0	0	-0.560461	0.1653	-1.07777	0.877851	0.731284
G4912	DSBA-like thioredoxin domain protein	0	0	0	0	0	0.527267	-0.0208655	0.0463662	0.0600556	0.783447
G4913	ABC1 family protein	1	0	0	0	1	1.74609	0.326524	0.116425	0.751877	1.49017
G4914	HAD hydrolase, IA, variant 1 family protein	0	0	0	0	0	-0.222514	0.109179	0.195592	-0.0682538	-0.209478
G4915	WYL domain protein	0	0	0	0	0	1.01102	-0.0661877	-0.290686	-0.285704	0.814281
G4916	hypothetical protein	0	0	0	0	0	-0.425291	0.0650141	-0.0883255	1.15045	0.280566
G4917	fatty acid desaturase family protein	0	0	0	0	0	0.610051	0.453239	-0.624039	0.442701	-0.352907
G4918	benzoate transporter family protein	0	0	0	0	0	-0.238132	-0.127607	-0.318339	0.0684988	-0.846467
G4919	fecCD transport family protein	0	0	-1	0	0	0.239138	-0.169963	-1.19744	-1.05614	-0.455369
hemD	uroporphyrinogen-III synthase HemD family protein	0	0	0	0	0	-0.289365	-0.0238868	0.240889	-0.204415	-0.240944
G4921	ABC transporter family protein	0	0	0	0	0	-1.15454	-0.676986	-0.570406	-1.14377	-0.308418
G4922	bacterial regulatory helix-turn-helix , lysR family protein	0	-1	-1	0	0	-0.642992	-1.28145	-1.21981	-0.222359	-0.0752715
G4923	NADH-Ubiquinone/plastoquinone (complex I), various chains family protein	0	0	0	0	0	-0.0990275	-0.0181589	-0.442871	-0.256385	0.345649
G4924	hypothetical protein	0	0	0	0	0	-0.0772122	0.109854	0.185354	-0.933462	-0.0294299
G4925	hypothetical protein	0	-1	0	0	0	0.423527	-1.12442	-0.25462	-0.477711	-0.233568
G4926	threonine ammonia-lyase, biosynthetic	0	0	0	0	0	-0.543702	0.00708801	-0.13957	-0.166412	0.0620472
G4927	acyl-CoA dehydrogenase, C-terminal domain protein	1	1	0	0	1	1.46955	1.02869	-0.0591998	0.990806	2.43453
G4928	amino acid permease family protein	0	0	0	0	-1	-1.00774	-0.305494	-0.328134	-0.659299	-1.17802
G4929	calcineurin-like phosphoesterase family protein	0	0	0	0	0	-0.398603	0.083484	-0.241002	0.153943	-0.252828
dnaN	DNA polymerase III, beta subunit	0	0	0	0	0	-0.111226	-0.0876997	0.672571	-0.406145	-0.72957
G4931	major Facilitator Superfamily protein	0	0	-1	0	0	-0.474631	0.098125	-1.05156	0.161912	0.0650087
rsgA	ribosome small subunit-dependent GTPase A	-1	0	0	0	0	-1.49474	-0.616651	-0.710565	-0.325884	-0.569564
sucC	succinyl-CoA ligase [ADP-forming] subunit beta	0	0	0	0	0	0.20845	0.660952	0.874979	-0.314858	0.886479
pabC	aminodeoxychorismate lyase	0	0	0	0	0	0.103464	-0.366407	0.424477	-0.206257	-0.201769
edd	phosphogluconate dehydratase	0	0	0	0	1	0.380181	0.395928	0.375205	0.0798071	1.09231
G4936	diguanylate cyclase domain protein	0	0	0	0	-1	-0.230272	-0.319683	-0.311049	0.184466	-1.03458
rseP	RIP metalloprotease RseP	0	0	1	0	0	0.795499	-0.327522	1.0274	0.259856	0.693549
G4938	RDD family protein	0	0	0	0	0	0.70277	0.43943	0.300391	0.459655	0.12751
cycA	amino acid permease family protein	0	0	0	0	-1	-1.38107	-0.53205	0.10592	-0.127529	-1.10283
G4940	isochorismatase family protein	0	0	0	0	0	0.577478	0.775234	-0.412636	0.67488	0.815825
hrpA	ATP-dependent helicase HrpA	0	0	0	0	0	0.475403	0.276435	0.353143	0.180332	-0.034284
G4942	putative fumarylacetoacetate isomerase/hydrolase	0	0	0	0	0	0.537341	-0.618838	0.615442	0.222047	0.263344
G4943	H symporter family protein	1	0	0	0	0	1.3592	0.260068	0.69587	1.11016	0.961351
G4944	major Facilitator Superfamily protein	0	0	0	0	0	-0.0440578	-0.0969133	-0.654031	0.0857662	0.242054
dapF	diaminopimelate epimerase	0	0	0	0	0	-0.212098	0.324318	0.191252	-0.184847	0.595306
trmA	tRNA (uracil-5-)-methyltransferase	0	0	0	0	0	-0.632413	-0.83836	0.525571	-0.803199	-0.43491
alkB	fatty acid desaturase family protein	0	0	0	0	0	0.0977793	0.706861	0.992488	1.22833	0.601645
G4948	AMP-binding enzyme family protein	0	0	0	1	0	0.334614	-0.138688	0.0582423	1.46761	-0.718891
tauA	taurine ABC transporter, periplasmic binding protein	0	1	0	0	-1	-0.892958	1.14176	-0.72166	-0.0196421	-1.13206
agcS	amino acid carrier family protein	-1	0	0	0	0	-2.85618	-0.959176	-0.902543	-0.601647	-0.747876
tauD	alpha-ketoglutarate-dependent taurine dioxygenase	0	1	0	0	0	0.698729	1.57169	0.680241	0.626535	-0.0960316
G4952	coA-transferase III family protein	0	0	0	0	0	0.274022	0.485219	0.182113	0.495067	0.406698
G4953	short chain dehydrogenase family protein	0	0	0	0	0	-0.446885	0.912711	0.500969	1.24121	0.591701
ghrB	NAD binding domain of 6-phosphogluconate dehydrogenase family protein	0	0	0	0	0	-0.140437	-0.143195	0.306788	-0.286255	-0.38412
G4955	formate/nitrite transporter family protein	0	0	0	0	0	0.694774	0.792381	0.215944	1.34877	0.115711
aat	leucyl/phenylalanyl-tRNA--protein transferase	0	0	0	0	0	-0.348968	0.144109	-0.332008	0.315989	-0.419887
G4957	H-NS histone family protein	0	0	0	0	0	0.112449	-0.380798	-1.27995	-1.10476	0.830701
mfd	transcription-repair coupling factor	0	0	0	0	1	0.79254	0.198853	0.166331	0.229976	1.15341
G4960	peroxidase family protein	0	0	0	0	0	-0.171398	-0.428206	0.730601	-0.328588	-0.148973
hscA	fe-S protein assembly chaperone HscA	0	0	0	0	0	-0.380807	0.309958	0.570229	-0.155354	-0.368011
serS	serine--tRNA ligase	0	0	0	0	0	-0.37065	-0.408596	-0.0277725	-0.959075	0.618181
parC	DNA topoisomerase IV, A subunit	0	0	0	0	0	-0.12594	-0.402678	0.289899	-0.414528	-0.0894434
mdcG	malonate decarboxylase holo-[acyl-carrier-protein] synthase	0	0	0	0	0	0.542208	-0.558125	-0.210351	0.342949	-0.165313
G4965	sulfite exporter TauE/SafE family protein	0	0	0	0	0	0.334176	0.0850163	-0.998349	0.669168	0.317902
pheS	phenylalanine--tRNA ligase, alpha subunit	0	0	0	0	0	-0.428692	-0.285805	0.0261594	-0.578349	0.107244
G4967	DEAD/DEAH box helicase family protein	0	0	0	0	0	-0.661007	-0.344531	-0.334836	-0.267297	0.220164
glnS	glutamine--tRNA ligase	-1	0	0	0	0	-1.34791	-0.700185	-0.583194	-1.28908	0.200971
topA	DNA topoisomerase I	0	0	0	0	0	0.0312902	-0.218638	0.0292023	-0.44942	-0.531742
G4970	pirin family protein	1	0	0	0	0	1.37366	0.374981	0.862933	0.512274	0.512581
G4971	hypothetical protein	-1	0	0	0	0	-1.75913	-0.313151	-0.871952	-0.360982	-0.191594
ncs1	permease for cytosine/purine, uracil, thiamine, allantoin family protein	0	0	0	0	0	-0.350446	-0.574369	-0.762585	-0.242454	-0.757662
kgtP	sugar (and other) transporter family protein	0	0	0	0	0	-0.123759	0.183201	-0.13381	-0.325295	0.612936
htpG	histidine kinase-, DNA gyrase B-, and HSP90-like ATPase family protein	1	0	0	0	1	1.75341	0.555467	0.717244	-1.08063	1.48541
G4975	citrate transporter family protein	0	0	0	0	0	-0.00996404	-0.235671	0.14656	0.842954	-1.38948
G4976	fecCD transport family protein	0	0	-1	0	0	-0.206837	0.484589	-1.32146	0.525091	-0.0100803
G4977	3-deoxy-7-phosphoheptulonate synthase	0	0	0	0	0	-0.216783	-0.521446	-0.863262	-0.777961	0.466385
trpB	tryptophan synthase, beta subunit	0	0	0	0	0	0.169633	-0.0876669	0.227209	-0.500962	0.371701
G4979	acyl-CoA dehydrogenase, C-terminal domain protein	0	1	0	0	1	0.331343	1.27346	0.231511	0.526879	1.11115
cydA	cytochrome d ubiquinol oxidase subunit 1	0	0	0	0	0	-0.65087	-0.432665	-0.798147	0.326139	0.443038
G4981	hypothetical protein	0	0	0	0	0	0.898434	0.621255	0.634852	0.247709	0.726147
bpeE	efflux transporter, RND family, MFP subunit	0	0	0	0	0	-0.260753	-0.24019	-0.64752	-0.298448	-0.204313
G4983	short chain dehydrogenase family protein	0	0	0	0	0	0.526801	0.148377	-0.0783247	0.237398	0.707232
ribF	riboflavin biosynthesis protein RibF	0	0	0	0	0	-0.318877	-0.386287	-0.450415	-0.110334	-0.0627186
iscA	iron-sulfur cluster assembly protein IscA	0	0	0	0	0	0.525922	-0.265107	0.147928	0.0975972	0.00143501
G4986	bacterial regulatory s, tetR family protein	0	0	0	0	0	0.363747	-0.192927	0.0634332	0.286312	0.314309
gltS	sodium/glutamate symporter	-1	0	0	0	0	-1.19024	0.300983	-0.143937	-0.144555	0.260764
acoB	2,6-dichlorophenolindophenol oxidoreductase subunit beta	0	0	0	0	0	-0.318086	0.161628	-0.248688	1.01285	-0.719619
G4989	eamA-like transporter family protein	0	0	0	0	0	-0.1522	-0.0730446	-0.278716	0.54548	0.660165
ubiG	3-demethylubiquinone-9 3-O-methyltransferase	1	0	0	0	0	1.38715	0.166394	-0.217022	0.000134364	0.992495
G4991	FHA domain protein	0	0	0	0	0	0.219215	0.205875	0.0367549	-0.476394	0.0451432
rpe	ribulose-phosphate 3-epimerase	-1	0	0	0	0	-1.34362	-0.0268813	-0.734754	-0.503552	-0.438935
G4993	hypothetical protein	0	0	0	0	0	-0.758775	-0.608258	-0.759453	0.240655	-0.591424
gcd	quinoprotein glucose dehydrogenase	-1	0	0	0	0	-2.06181	-0.0504803	-0.691835	-0.361613	-0.840073
sstT	dicarboxylate symporter family protein	-1	0	0	0	0	-1.4099	-0.396483	0.16213	-0.572151	-0.537639
argJ	glutamate N-acetyltransferase/amino-acid acetyltransferase	0	-1	-1	0	0	-0.976605	-1.07889	-1.18295	-0.889758	-0.162971
G4997	amino acid adenylation domain protein	0	1	0	0	0	0.572351	1.51871	-0.102874	-0.21105	-0.184108
G4998	survival SurE family protein	0	0	0	0	0	0.348873	0.34934	-0.823348	0.145364	-0.734236
groL	chaperonin GroL	0	0	0	0	1	1.14492	0.648057	0.524081	-1.45621	1.3102
G500	ATP-grasp domain protein	0	0	0	0	0	0.67496	0.306735	0.285692	-0.153987	0.110167
G5000	hypothetical protein	1	1	1	1	1	2.78148	1.27349	1.58561	2.08027	1.47202
ureF	ureF family protein	0	0	0	0	0	1.1015	0.619911	0.764433	0.288666	-0.0856189
G5002	hypothetical protein	1	0	0	0	-1	2.3952	-0.32614	-0.92403	0.5975	-1.46909
pqqC	coenzyme PQQ biosynthesis protein C	1	0	1	0	1	1.14265	0.538508	1.0131	0.770969	1.06677
G5004	tonB-dependent siderophore receptor family protein	0	0	-1	0	0	-0.698806	-0.26201	-1.98028	-0.283071	-0.0936293
G5005	hypothetical protein	0	0	0	0	0	0.164119	0.730766	-0.141356	0.0665709	-0.131035
G5006	MJ0042 family finger-like domain protein	0	0	0	0	0	-0.476955	0.0214156	-0.204392	-0.16906	-0.474646
prpB	methylisocitrate lyase	1	0	1	0	0	1.86123	0.0543848	1.08751	0.204616	0.817271
rbfA	ribosome-binding factor A	0	0	0	0	0	-1.01146	-0.0787568	-0.123371	-0.27758	-0.468369
lepB	signal peptidase I	0	0	0	0	0	-0.443507	0.024547	0.350403	-0.86883	-0.397851
G5010	dehydratase family protein	0	0	0	0	0	0.176814	-0.632686	-0.41359	-0.336211	0.108805
G5011	hypothetical protein	1	1	0	1	1	3.60359	3.20152	-0.0079211	4.37367	2.76189
gspF	type II secretion system protein F	0	0	0	0	0	-0.286996	-0.0500729	0.24713	0.0361789	0.213056
G5013	na /H ion antiporter subunit	0	0	0	0	0	-0.0614651	-0.14324	-0.50328	-0.224294	0.480278
G5014	peptidase M48 family protein	1	1	0	0	1	1.79561	1.32099	0.937125	0.674958	3.40369
G5015	bacterial regulatory s, tetR family protein	0	0	0	0	0	0.189802	-0.524582	-0.939267	0.712899	0.0337
G5016	corA-like Mg2 transporter family protein	0	0	0	0	0	-0.0279232	0.357923	0.0564307	0.0460262	0.333116
G5017	ferric iron reductase FhuF-like transporter family protein	0	0	-1	0	0	0.283849	0.149788	-2.30952	-0.656471	-0.330093
G5018	short chain dehydrogenase family protein	0	0	0	0	0	0.494033	0.153117	-0.193524	0.936335	-0.0571069
fruA	PTS system, Fru family, IIB component domain protein	0	0	0	0	0	-0.790468	-0.152673	0.316048	-0.750389	0.19349
G502	hypothetical protein	0	0	0	0	1	0.991934	0.205396	0.77594	0.0253211	1.57977
G5020	inhibitor of apoptosis-promoting Bax1 family protein	0	0	0	0	0	-0.302993	0.356729	-0.491271	-0.409929	0.307451
G5021	bacterial transferase hexapeptide family protein	0	0	0	0	0	0.511973	-0.0184855	0.171684	0.762732	-0.477474
G5022	bacterial regulatory helix-turn-helix , lysR family protein	0	0	0	0	0	-0.503749	-0.00370711	-0.886605	0.297579	-0.167376
G5023	bacterial regulatory helix-turn-helix , lysR family protein	0	0	0	0	0	0.935985	-0.0576475	0.791043	0.669768	-0.175018
citA	sugar (and other) transporter family protein	0	0	0	0	0	-0.261841	-0.15448	-0.137418	0.43631	-0.591525
G5025	acyltransferase family protein	0	0	0	0	0	-0.826127	0.229752	0.0676676	0.193776	-0.0673432
lpxD	UDP-3-O-[3-hydroxymyristoyl] glucosamine N-acyltransferase	0	0	0	0	0	0.453121	-0.434651	0.428371	-0.231157	-0.0542914
G5027	2Fe-2S iron-sulfur cluster binding domain protein	0	0	0	0	0	0.0343794	0.0221878	0.514351	0.000208643	-1.02924
dedA	protein dedA	0	0	0	0	0	0.189067	0.088861	-0.0537976	0.0313064	0.876407
antB	anthranilate 1,2-dioxygenase, small subunit	0	0	0	0	0	0.135749	0.273142	-0.197652	0.329334	-0.463875
G5030	putative metal-dependent hydrolase family protein	0	0	0	0	0	-0.550043	0.175977	-0.826802	-0.325052	-0.286834
lpxH	UDP-2,3-diacylglucosamine hydrolase	0	0	0	0	0	0.124563	0.467576	0.578769	0.533284	-0.145933
catM	HTH-type transcriptional regulator CatM	0	0	0	0	0	-0.347171	-0.241388	0.0975674	0.0418953	-0.445548
G5036	putative cob(I)alamin adenosyltransferase	0	0	0	0	0	-0.882636	-0.422857	0.0280891	-0.505237	-0.514252
fabB	beta-ketoacyl synthase, C-terminal domain protein	-1	-1	-1	0	-1	-1.95698	-1.52417	-2.05684	-1.50011	-1.29138
G5038	alanine dehydrogenase/PNT, C-terminal domain protein	-1	0	0	0	0	-2.4547	0.444663	-0.816399	-0.476725	0.239863
modE	molybdenum-binding transcriptional repressor	0	0	0	0	0	0.12484	-0.535531	-0.218544	-0.193429	-1.92333
G5040	putative quercetin 2,3-dioxygenase yhhW	0	0	0	0	0	0.944014	0.782604	0.0480766	0.639448	0.703125
nuoC	NADH-quinone oxidoreductase subunit C/D	0	0	0	0	0	-0.502262	0.230358	0.138238	-0.691726	0.65304
G5042	small Multidrug Resistance family protein	0	0	0	1	0	1.12265	0.596755	-0.796239	2.19988	0.248123
G5043	tetratricopeptide repeat family protein	0	0	0	0	1	0.523106	0.104428	0.609442	0.311255	1.10043
lpxB	lipid-A-disaccharide synthase	0	0	0	0	0	0.299084	0.0430572	0.53024	-0.298037	-0.154922
nuoL	NADH-quinone oxidoreductase subunit L	0	0	0	0	0	-0.302179	0.279445	0.348518	-0.415807	0.929723
G5046	alpha/beta hydrolase fold family protein	0	1	0	0	-1	-0.279082	1.58548	-0.547244	0.283253	-1.19621
G5047	ATP-grasp domain protein	1	1	0	0	0	1.88037	1.9986	0.277313	1.13425	-1.01902
G5048	peptidase M48 family protein	0	0	0	0	0	-0.372864	-0.274986	0.183618	-0.0651475	-0.294096
metG	methionine--tRNA ligase	0	0	0	0	0	-0.605195	-0.158402	0.288115	-0.59546	-0.022644
G505	acyl-CoA dehydrogenase, N-terminal domain protein	0	0	0	0	0	0.228139	0.0112665	0.508253	0.238345	-0.194834
prpC	2-methylcitrate synthase/citrate synthase II family protein	1	0	0	0	0	1.60077	0.303993	0.684868	0.236443	0.974404
tyrB	aromatic-amino-acid aminotransferase	0	0	0	0	0	0.0528563	-0.783901	-0.113403	-0.0931899	0.0645866
G5055	sigma 54 modulation / S30EA ribosomal family protein	0	0	0	0	0	0.893016	0.434692	0.643407	0.698454	-0.706173
greB	transcription elongation factor GreB	-1	0	0	0	0	-1.4212	-0.494818	-0.433944	-0.196468	-0.876545
G5059	his Kinase A domain protein	0	0	0	0	0	-0.0655292	0.146982	-0.215414	0.0885898	0.101278
G5060	RNA pseudouridylate synthase family protein	0	0	0	0	0	-0.793306	-0.100869	-0.434739	-0.044134	-0.903562
G5061	hypothetical protein	0	1	1	0	0	0.0705292	1.80036	1.0701	1.13221	-0.306912
G5062	luciferase-like monooxygenase family protein	0	0	0	0	0	0.233293	0.444117	0.198368	0.399473	-0.148977
benB	benzoate 1,2-dioxygenase, small subunit	0	0	0	0	0	-0.304882	-0.0258995	-0.631785	0.108392	-0.557431
G5064	hypothetical protein	0	0	0	0	0	-0.368717	-0.197107	-0.0917454	-0.254399	0.00972276
G5065	TENA/THI-4/PQQC family protein	0	0	0	0	0	-0.925054	0.300957	-0.239854	-0.236579	-0.360922
recF	DNA replication and repair RecF family protein	0	0	0	0	0	-0.706642	0.238126	-0.323557	-0.0633603	-0.502848
G5067	phosphoenolpyruvate carboxykinase family protein	-1	0	-1	-1	0	-2.21722	-0.865989	-1.00606	-1.6269	-0.0565838
G5068	hypothetical protein	0	0	0	0	0	-0.867742	-0.565938	-0.591954	-0.0125146	-0.95348
gap	glyceraldehyde-3-phosphate dehydrogenase, type I	-1	-1	0	-1	0	-1.76644	-1.28612	-0.945649	-1.87306	0.185209
G5070	3-Oxoacyl-[acyl-carrier-(ACP)] synthase family protein	0	0	0	0	0	0.407233	0.472713	0.79715	-0.516545	-0.112272
benC	benzoate 1,2-dioxygenase electron transfer component	0	0	0	0	0	0.860712	0.624923	-0.0488584	1.02834	0.138777
rplA	ribosomal protein L1	0	0	0	0	0	-0.656159	-0.0815917	0.671457	-1.09924	-0.377184
secA	preprotein translocase, SecA subunit	0	0	0	0	0	1.01509	0.162825	0.769526	-0.231119	0.693137
uvrB	excinuclease ABC subunit B	1	0	0	0	0	1.54689	0.202429	0.707347	1.06907	0.795547
proB	glutamate 5-kinase	0	0	0	0	0	-0.382383	-0.270365	0.162419	-0.55286	0.432617
G5099	glutathione-dependent formaldehyde-activating enzyme family protein	0	0	0	0	0	-0.629647	-0.114907	-0.160156	-0.003678	0.148221
G5100	thiamine pyrophosphate enzyme, C-terminal TPP binding domain protein	0	1	0	1	0	0.795892	1.38558	-0.268804	1.78816	-0.541008
lpxC	UDP-3-O-[3-hydroxymyristoyl] N-acetylglucosamine deacetylase	0	0	0	0	0	-0.839311	-0.341778	0.0209026	-0.378702	-0.0947641
soj	cobQ/CobB/MinD/ParA nucleotide binding domain protein	0	0	0	0	0	-0.729365	-0.0659491	0.673609	-0.4666	-0.457063
prlC	peptidase M3 family protein	1	0	0	0	0	2.2522	0.498559	0.721046	1.30834	0.991027
G5104	efflux transporter, RND family, MFP subunit	1	1	1	1	1	5.56963	3.94262	4.50775	4.26181	5.23361
G5105	bacterioferritin	1	0	1	1	0	2.0633	0.333529	2.43642	2.779	0.215706
ysxC	ribosome biogenesis GTP-binding protein YsxC	-1	0	-1	0	0	-1.35938	-0.742437	-1.18246	-0.622104	-0.502506
murA	UDP-N-acetylglucosamine 1-carboxyvinyltransferase	0	0	0	0	0	-0.0767509	-0.01716	0.586541	-0.38829	-0.0886597
G5108	permease for cytosine/purine, uracil, thiamine, allantoin family protein	0	0	0	0	0	-0.00765672	0.307074	-0.365102	0.0817228	-0.853339
hxlR	hxlR-like helix-turn-helix family protein	0	0	0	0	0	0.109313	-0.0493798	0.0751498	0.154208	-0.111917
G5115	lysE type translocator family protein	0	0	0	0	-1	0.00719683	-0.411448	0.335941	0.134853	-1.44094
rlmL	N-6 DNA Methylase family protein	0	0	0	0	0	-1.12671	-0.97762	-0.387973	-1.00971	-0.428032
cobA	uroporphyrinogen-III C-methyltransferase	0	0	0	0	0	-0.298156	0.279408	0.0196465	-0.0441154	-0.0745722
G5118	carboxymuconolactone decarboxylase family protein	1	0	0	0	0	1.4627	0.47859	0.697685	0.256506	0.664023
G5119	diguanylate cyclase domain protein	0	0	-1	0	1	-0.865444	-0.285374	-1.19731	0.696576	1.00492
G5120	membrane transport family protein	1	0	0	0	0	1.44646	0.986434	0.670215	0.959595	-0.162145
G5121	ABC transporter family protein	0	0	0	0	0	-0.46511	-0.0812697	-0.0493557	-0.181209	-0.488258
G5122	response regulator	0	0	0	0	0	-0.180478	-0.117633	-0.692036	0.906861	-0.329413
uvrA	excinuclease ABC subunit A	1	0	0	0	1	1.43881	0.6448	0.105407	0.38179	1.24674
G5124	phosphotransferase enzyme family protein	1	0	0	0	0	1.09421	0.37898	0.367679	0.0618097	0.535261
G5125	hypothetical protein	0	0	0	0	0	0.000269394	0.191111	-0.152247	0.185399	0.122122
eutB	ethanolamine ammonia lyase large subunit family protein	1	0	0	0	0	1.29861	-0.0681134	-0.112487	0.891444	-1.02916
G5127	winged helix-turn-helix DNA-binding family protein	0	0	0	0	0	-0.827705	-0.219972	-0.656768	0.461665	0.800735
G5128	paraquat-inducible A family protein	1	0	0	0	0	1.26027	0.692569	0.454132	0.47527	0.232365
G5129	branched-chain amino acid transport family protein	0	0	0	0	0	-1.17027	-0.237676	-0.245828	-0.110658	-0.884104
oprC	efflux transporter, outer membrane factor (OMF) lipo, NodT family protein	0	0	0	0	0	-0.43974	-0.384233	-0.275114	-0.148329	-0.605377
G5131	cobQ/CobB/MinD/ParA nucleotide binding domain protein	0	0	0	0	0	-0.37915	0.137839	-0.328105	-0.103349	0.776773
G5132	bacterial Cytochrome Ubiquinol Oxidase family protein	0	1	0	0	0	0.244343	1.2907	0.163291	-0.380272	0.806397
G5133	bacterioferritin comigratory protein	0	0	0	0	0	0.695165	-0.18276	-0.267219	-0.33906	0.919235
accB	acetyl-CoA carboxylase, biotin carboxyl carrier protein	-1	-1	-1	0	-1	-1.6947	-2.10389	-2.15796	-1.30222	-1.91134
G5135	phosphate-selective porin O and P family protein	0	0	0	0	0	0.209294	-0.509401	-0.0122172	0.260375	-0.894465
G5136	FAD binding domain protein	1	0	0	0	1	1.44553	0.254266	0.0902585	0.570591	1.3594
G5137	phospholipase D family protein	0	0	0	0	0	-0.280628	-0.173953	-0.0466466	-0.0064274	-0.113691
G5138	monovalent cation/proton antiporter, MnhG/PhaG subunit	0	0	0	0	0	0.269023	-0.357184	-0.349386	0.0751058	0.460973
G5139	zinc-binding dehydrogenase family protein	1	1	0	1	0	2.94297	1.88317	0.843953	2.25976	0.695986
G5140	efflux transporter, RND family, MFP subunit	0	0	0	0	0	0.662096	0.598833	0.634401	0.754736	-0.389454
G5141	cupin domain protein	0	0	0	0	0	-0.182117	0.365452	-0.326551	0.269274	0.33442
pyrG	CTP synthase	0	0	0	0	0	-0.608351	-0.0953086	0.626342	-0.539414	-0.0551922
G5143	glutamate synthase, small subunit domain protein	0	0	1	0	0	0.756819	0.329257	1.13687	0.0500974	0.343137
mutL	DNA mismatch repair MutL family protein	0	0	0	0	0	0.074054	0.0460182	0.000505954	-0.118256	-0.0182914
aroB	3-dehydroquinate synthase	0	0	0	0	0	0.0456207	0.226265	0.389891	0.0711225	0.00222534
pta	phosphate acetyltransferase	1	0	0	1	0	1.86945	0.449784	0.711452	2.13385	0.655614
G5147	hypothetical protein	0	0	0	0	0	-0.297994	-0.288032	-0.381408	0.361514	-0.010177
G5148	patatin-like phospholipase family protein	1	0	0	0	1	1.16041	0.823088	0.897345	1.74249	2.13376
G5149	exodeoxyribonuclease V, gamma subunit	0	0	0	0	0	-0.437658	-0.224293	-0.452063	-0.248039	-0.446735
G515	bacterial regulatory s, tetR family protein	0	0	0	0	-1	-0.692594	0.0878245	0.761293	0.377159	-2.06659
G5150	porin B	-1	0	0	0	-1	-2.8229	-0.460092	-0.653646	-0.703878	-1.58463
ruvC	crossover junction endodeoxyribonuclease RuvC	0	0	0	0	0	-1.02119	-0.637068	-0.386796	0.000899326	-0.541207
G5152	metallo-beta-lactamase superfamily protein	0	0	0	0	0	0.521117	0.362187	-0.0606507	0.0423458	0.146526
G5153	type II secretion system (T2SS), N family protein	0	0	0	0	0	-0.555086	-0.404479	0.0421275	-0.327137	-0.068812
hemL	glutamate-1-semialdehyde-2,1-aminomutase	0	0	0	0	0	-0.475118	-0.0893962	-0.0864122	-0.781298	0.2145
astC	succinylornithine transaminase family protein	0	0	0	0	0	1.01706	-0.0208062	0.580068	0.460699	-0.369812
atsA	arylsulfatase	0	0	0	0	0	-0.302747	0.262387	-0.888753	0.369007	-0.582366
G5158	hypothetical protein	0	0	0	0	0	-0.705765	-0.486956	-0.21126	-0.278705	-0.517549
G5159	hypothetical protein	0	0	1	0	0	0.9213	0.541871	1.06447	0.403103	0.665295
G5160	major Facilitator Superfamily protein	0	0	0	0	0	0.0821763	-0.337368	-0.124925	0.61535	-0.255308
ahcY	adenosylhomocysteinase	0	0	0	0	0	-1.04529	-0.259404	0.27928	-0.75831	0.107173
G5168	hypothetical protein	-1	0	-1	0	0	-1.78423	-0.528307	-1.16926	0.106878	0.185379
kdsD	sugar isomerase, KpsF/GutQ family protein	1	0	1	0	0	2.21237	0.563851	1.04693	0.446376	0.847464
G517	fimbrial family protein	0	0	0	0	-1	0.270909	-0.0864596	-0.82675	1.27849	-1.0159
G5170	dolichyl-phosphate-mannose-mannosyltransferase family protein	0	0	0	0	0	-0.246987	0.85421	0.264532	0.379001	-0.531501
ansB	glutaminase-asparaginase	-1	-1	0	0	-1	-1.40511	-1.29951	0.190273	-1.48854	-1.16381
rep	ATP-dependent DNA helicase Rep	0	0	0	0	0	-0.62887	-0.413381	0.136339	-1.05173	0.123331
tpiA	triose-phosphate isomerase	0	0	0	0	0	-1.32959	-0.447427	-0.407448	-0.792932	-0.190006
G5176	bacterial regulatory helix-turn-helix , lysR family protein	0	0	0	0	0	0.0537296	0.0314597	-0.106695	0.289944	-0.26093
G5177	NADPH-dependent FMN reductase family protein	-1	0	-1	0	0	-1.9541	-0.536929	-1.30061	-1.54732	0.645508
glyS	glycine--tRNA ligase, beta subunit	-1	0	0	0	0	-1.2401	-0.493297	-0.437667	-1.69611	-0.0355707
G5179	RDD family protein	0	0	0	0	0	0.289119	0.68091	0.365263	0.460099	0.233522
G518	catalase family protein	0	0	0	0	0	0.0347354	0.539843	-0.0288825	0.590722	0.0569871
G5180	phosphotransferase enzyme family protein	0	0	0	0	0	-0.0588382	0.159337	0.71751	-0.589291	0.428802
G5181	putative O-methyltransferase	0	0	0	0	0	-0.40739	-0.342623	-0.566073	-0.331116	0.251644
G5182	glycosyl transferase 2 family protein	1	1	0	1	1	1.8485	1.555	0.431203	2.28246	1.32028
G5183	sporulation related domain protein	0	0	0	0	0	-0.0329478	-0.220367	0.314108	-0.025621	0.754552
G5184	putative permease YjgP/YjgQ family protein	0	0	0	0	0	0.531695	0.548383	0.664894	0.523321	0.590649
G5185	CBS domain protein	0	0	0	0	0	0.434337	0.342779	0.349984	0.648293	0.0478173
tgt	queuine tRNA-ribosyltransferase	0	0	0	0	0	-0.431967	-0.708849	0.15303	-0.983683	-0.0295888
dapB	dihydrodipicolinate reductase	0	0	0	0	1	0.228418	-0.326403	0.189851	-0.0452871	1.01119
G5188	glutathione S-transferase, N-terminal domain protein	0	0	0	0	0	-0.962637	-0.539616	-0.776163	-0.124349	-0.57535
G5189	sugar (and other) transporter family protein	0	0	0	0	0	-0.319296	0.234957	-0.410649	0.173933	0.233696
G5190	acyl-CoA dehydrogenase, N-terminal domain protein	0	0	0	0	0	0.966023	-0.060146	0.438505	-0.0191243	-0.30132
G5191	bacterial regulatory s, luxR family protein	0	0	0	0	0	0.758387	0.510621	0.126975	0.730681	-0.151457
mqo	malate dehydrogenase	-1	0	0	0	0	-1.69004	-0.36606	-0.320354	-1.31372	-0.517516
kup	potassium uptake protein	0	0	0	0	0	-1.11846	-0.348953	-0.542204	-0.543098	0.505208
G5194	putative amino-acid transporter periplasmic solute-binding protein	0	0	0	0	0	0.725635	0.53764	0.12326	0.652936	-0.479145
fadH	flavin oxidoreductase / NADH oxidase family protein	0	1	0	0	1	0.531668	2.18182	0.949896	0.32667	1.82303
trpD	anthranilate phosphoribosyltransferase	0	0	0	0	0	0.203063	-0.207438	-0.182346	-0.159087	-0.22035
ispD	2-C-methyl-D-erythritol 4-phosphate cytidylyltransferase	0	0	0	0	0	0.689915	0.188562	0.257245	-0.194629	0.266612
G5206	alpha/beta hydrolase fold family protein	0	0	0	0	0	0.0401827	-0.309103	-0.292748	-0.320988	-0.0571562
tsf	translation elongation factor Ts	0	0	0	0	0	-0.840126	-0.2121	0.0527489	-0.582779	-0.366044
G5208	enoyl-CoA hydratase/isomerase family protein	0	0	0	0	0	-0.613511	-0.203075	-0.99114	-0.994018	0.0993034
G5209	NADH-Ubiquinone/plastoquinone (complex I), various chains family protein	0	0	0	0	0	0.04478	0.275092	-0.167496	0.179506	0.0908756
G5210	AAA domain family protein	0	0	0	0	0	-0.362128	-0.500688	-0.0128132	-0.500736	0.294898
G5211	bacterial extracellular solute-binding s, 5 Middle family protein	0	0	0	0	0	0.139232	-0.0715426	0.259826	0.26503	-0.577829
G5212	bacterial transcriptional regulator family protein	0	0	0	0	0	-0.594959	-0.43134	-0.435643	-0.264722	-0.121903
ygaZ	inner membrane protein YgaZ	-1	0	0	0	0	-1.30714	-0.378213	-0.731862	-0.206652	-0.658134
G5214	glutathione-dependent formaldehyde-activating enzyme family protein	1	0	0	1	0	3.19323	0.400268	-0.0498754	2.33928	0.233212
G5215	hypothetical protein	-1	-1	-1	0	-1	-3.37167	-1.40174	-1.75191	-1.06506	-1.49767
dacF	D-alanyl-D-alanine carboxypeptidase family protein	0	0	0	0	0	-0.836687	0.14683	0.0615702	-0.027353	0.388793
moaE	moaE family protein	0	0	0	0	0	-0.0748771	-0.503269	-0.404896	-0.213755	-0.114291
G5218	ABC transporter family protein	0	0	1	0	-1	0.561284	0.794478	1.01394	-0.185359	-1.2281
G522	chorismate binding enzyme family protein	0	0	0	0	-1	-0.719467	-0.378167	-0.0997354	-0.286061	-1.0997
pssA	CDP-diacylglycerol-serine O-phosphatidyltransferase	0	0	0	0	0	-0.260558	0.410848	0.39306	0.131428	-0.239837
lysP	lysine-specific permease	-1	0	0	0	0	-1.83723	-0.729781	-0.190748	-1.3286	-0.938574
G5227	omega-amino acid--pyruvate aminotransferase	0	0	0	0	0	0.464912	0.276733	-0.279034	0.617773	0.370388
G5228	degT/DnrJ/EryC1/StrS aminotransferase family protein	0	0	0	0	0	0.215193	0.435399	0.475641	-0.612725	0.531581
G5229	peptidase C39 family protein	0	0	0	0	0	0.3384	0.183464	0.30181	-0.365978	-0.459424
G5230	mycolic acid cyclopropane synthetase family protein	0	0	0	0	1	1.2305	0.834989	0.31552	0.650594	1.11921
ribA	GTP cyclohydrolase-2	0	0	0	0	0	-0.0755373	-0.0880304	0.204669	-0.432202	-0.143964
pobA	4-hydroxybenzoate 3-monooxygenase	0	-1	0	0	0	0.211107	-1.9177	-0.733707	0.798609	0.23092
G5233	NAD dependent epimerase/dehydratase family protein	0	0	0	0	0	0.434303	-0.317391	-0.567797	0.218545	0.540506
G5234	ABC transporter family protein	0	0	0	0	0	-0.226348	-0.192756	-0.814531	0.0693825	0.482721
mviN	integral membrane protein MviN	0	0	0	0	0	-1.08789	-0.0078114	-0.169075	0.161476	0.244252
G5236	radical SAM superfamily protein	0	0	0	0	0	-0.734603	-0.126989	0.068165	-0.293371	-0.306973
mutM	formamidopyrimidine-DNA glycosylase	0	0	-1	0	0	-1.12456	-0.368184	-1.07557	0.0154549	-0.18003
G5238	alpha/beta hydrolase fold family protein	0	0	0	0	0	-0.0880133	0.108054	-0.33511	0.0873164	-1.00365
G5239	aerobic C4-dicarboxylate transport protein	0	0	0	0	0	-1.04997	-0.72213	-0.117913	-0.846283	-0.438932
G5240	amino acid permease family protein	0	0	0	0	0	-0.161174	-0.413321	-0.734227	0.311876	-0.423664
G5241	outer membrane porin, OprD family protein	-1	0	0	0	0	-1.34197	-0.3536	0.406123	-0.234023	-0.87796
G5242	RND transporter, hydrophobe/amphiphile efflux-1 family protein	1	1	1	1	1	2.64421	1.91392	2.56041	2.40702	3.15743
G5243	bacterial regulatory s, tetR family protein	0	-1	0	0	0	-1.06006	-1.0687	-0.254322	-0.462195	-0.590554
hppD	4-hydroxyphenylpyruvate dioxygenase	0	0	1	1	-1	0.193462	0.796902	1.70587	2.50608	-1.07566
G5245	ABC transporter family protein	0	0	0	0	0	-0.464783	-0.345526	-0.0296717	-0.189725	-0.0762622
G5246	outer membrane efflux family protein	0	0	0	0	0	0.581752	0.415854	-0.251462	0.545885	0.871232
mmgC	acyl-CoA dehydrogenase, N-terminal domain protein	0	0	0	0	0	-0.389518	-0.518379	-0.487902	-1.22604	-0.178008
G5248	thiF family protein	0	0	0	0	0	-0.614625	0.252343	-0.118496	0.0430845	0.408409
G5249	hypothetical protein	0	0	0	0	0	-0.714059	0.636957	-0.0364387	0.0487947	-0.319624
gdhB	quinoprotein glucose dehydrogenase B	1	0	0	0	1	1.35178	0.969254	0.551449	1.27211	1.61518
yfdH	glycosyl transferase 2 family protein	0	0	-1	0	0	-0.580365	0.637544	-1.00207	0.079408	-0.82389
G5252	acyltransferase family protein	-1	0	0	0	0	-1.15226	0.00895807	0.495976	-0.643711	-0.80606
G5253	endoribonuclease L-PSP family protein	-1	0	-1	0	-1	-2.90599	-0.0884716	-1.39913	-0.403535	-1.08369
G5254	tartrate dehydrogenase	0	0	0	0	0	0.227662	-0.658406	-0.592078	0.854821	0.172216
G5255	site-specific recombinase family protein	0	0	0	0	0	-0.164334	-0.14727	-0.169927	-0.131112	-0.421825
G5256	ACT domain protein	0	0	0	0	0	-0.542168	0.13205	-0.0314492	-0.635749	0.144661
rluD	ribosomal large subunit pseudouridine synthase D	0	0	0	0	0	-0.51991	-0.307063	-0.252674	-0.321348	0.169559
rpsC	ribosomal protein S3	-1	0	0	0	0	-1.41211	-0.48373	-0.258429	-1.01583	0.159912
G5261	cation diffusion facilitator transporter family protein	0	0	0	0	0	0.506339	0.975328	0.81933	0.19528	0.474236
G5262	ostA-like family protein	0	0	0	0	0	0.568959	0.00118682	0.160682	-0.0606952	0.936125
G5263	dicarboxylate symporter family protein	0	-1	0	0	0	-1.25182	-1.11572	-0.524521	-0.307255	-0.680565
G5264	delta-1-pyrroline-5-carboxylate dehydrogenase	0	0	0	0	0	-0.965876	-0.453533	-0.294452	-0.675639	-0.26459
G5265	radical SAM superfamily protein	-1	0	0	0	0	-1.25947	-0.410472	-0.259117	0.0239375	-0.68556
G5266	hypothetical protein	0	0	0	0	0	0.243938	0.490191	0.142253	0.635011	0.0863113
[truncated: 829 more rows]

## Sheet: Table S4
Table S4. Common DEGs between samples treated with 2 mg/L colistin at 15 and 60 min
Gene	Annotation	COG*	logFC (15 min)	FDR (15 min)	logFC (60 min)	FDR (60min)
G1632	hypothetical protein	S	8.35	7.52e-74	7.97	3.02e-68
G5620	hypothetical protein	S	7.99	1.63e-95	8.34	2.72e-68
G5524	hypothetical protein	[]	7.52	1.28115e-105	7.35	2.14e-78
G4111	glycine-zipper containing OmpA-like membrane domain protein	[]	7.17	3.39e-46	6.76	5.84e-72
G4259	glycine zipper family protein	[]	6.82	1.93e-52	6.13	9.31e-16
G4232	hypothetical protein	[]	6.81	1.72e-86	7.48	6.28e-42
G5947	putative lipoprotein	[]	6.62	1.38e-55	6.34	2.9e-42
G5570	glycine zipper family protein	[]	5.55	3.53e-75	5.4	1.6e-42
G2001	hypothetical protein	[]	5.38	1.78e-68	5.45	2.21e-74
G552	ABC transporter family protein	V	5.25	1.2e-78	5.37	1.35e-47
G5104	efflux transporter, RND family, MFP subunit	V	5.23	7.26e-74	5.3	1.55e-53
G287	efflux transporter, outer membrane factor (OMF) lipo, NodT family protein	M	4.97	1.12e-60	5.01	2.15e-44
G1896	metallo-beta-lactamase superfamily protein	S	4.93	2.01e-39	3.98	1.09e-17
lolA	outer membrane lipocarrier protein LolA	M	4.79	2.45e-68	4.9	4.61e-68
G4397	hypothetical protein	[]	4.58	1.63e-63	4.17	4.44e-16
G1967	hypothetical protein	S	4.44	4.11e-63	5.25	1.03e-33
G614	hypothetical protein	S	4.27	5.55e-54	4.22	4.61e-42
G1318	hypothetical protein	[]	4.26	1.31e-24	4.88	1.55e-17
G1797	hypothetical protein	[]	4.11	2.36e-50	4.42	1.16e-26
pgaA	poly-beta-1,6 N-acetyl-D-glucosamine export porin PgaA	M	3.96	2.39e-52	3.58	1.42e-30
G4102	hypothetical protein	[]	3.9	2.21e-20	2.69	2.66e-10
G4354	hypothetical protein	S	3.87	1.75e-28	3.94	7.46e-10
G1292	putative secreted protein	[]	3.83	2.17e-38	3.43	1.07e-22
G6053	hypothetical protein	S	3.76	2.02e-23	2.72	3.65e-10
pgaB	poly-beta-1,6-N-acetyl-D-glucosamine N-deacetylase PgaB	G	3.71	2.68e-41	3.57	4.05e-22
G2118	hypothetical protein	S	3.62	2.44e-50	3.8	2.44e-41
G1876	hypothetical protein	[]	3.62	8.67e-45	3.92	4.01e-35
G5978	hypothetical protein	[]	3.6	6.18e-37	4.59	1.4e-23
G2843	hypothetical protein	S	3.56	6.24e-32	4.42	1.86e-30
lolB	outer membrane lipoprotein LolB	M	3.52	6.76e-37	4.04	2.88e-39
G4596	hypothetical protein	[]	3.48	3.38e-20	2.54	0.000488
G5014	peptidase M48 family protein	O	3.4	2.67e-40	2.78	9.59e-24
pgaC	poly-beta-1,6 N-acetyl-D-glucosamine synthase	M	3.4	1.08e-39	3.43	4.91e-24
G4827	NADPH-dependent FMN reductase family protein	S	3.37	6.28e-28	2.32	1.63e-08
G5973	hypothetical protein	[]	3.28	1.85e-21	2.83	4.28e-09
G4427	glycine zipper family protein	M	3.27	1.37e-36	2.87	3.02e-23
ttg2D	toluene tolerance, Ttg2 family protein	Q	3.25	6.47e-42	3.57	8.13e-43
pgaD	poly-beta-1,6-N-acetyl-D-glucosamine biosynthesis protein PgaD	[]	3.23	1.35e-21	3.52	1.62e-12
G4412	lipoprotein	M	3.22	1.15e-33	2.77	9.26e-09
G418	HAMP domain protein	T	3.2	7.16e-39	3.05	2.08e-32
G1415	luciferase oxidoreductase, group 1 family protein	C	3.19	1.24e-35	2.65	1.96e-20
G4006	hypothetical protein	[]	3.19	5.03e-09	1.83	0.000646
G1895	bacterial regulatory s, tetR family protein	K	3.16	8.5e-29	3.04	1.37e-13
G5242	RND transporter, hydrophobe/amphiphile efflux-1 family protein	V	3.16	9.48e-31	3.11	2.01e-31
G1920	hypothetical protein	[]	3.15	4.59e-11	2.47	0.000184
argA	amino-acid N-acetyltransferase	E	3.02	4.71e-27	2.91	7.15e-28
G4126	hypothetical protein	[]	3.02	6.23e-21	2.57	7.88e-06
G1731	putative porin	[]	3.01	4.85e-13	2.7	2.43e-16
G4400	STAS domain protein	[]	2.99	5.17e-33	3.5	1.38e-39
G5468	putative surface antigen	[]	2.91	4.51e-08	2.63	5.27e-05
G1997	putative lipoprotein	[]	2.89	2.82e-18	1.94	0.00767
mucD	peptidase Do family protein	O	2.81	6.67e-25	2.16	4.27e-18
dsbA	disulfide interchange protein DsbA	O	2.77	7.02e-19	2.99	1.33e-19
G5011	hypothetical protein	S	2.76	4.93e-20	2.42	4.99e-08
G4108	putative lysine decarboxylase family protein	S	2.73	1.69e-27	2.77	7.47e-19
G3669	hypothetical protein	[]	2.72	1.21e-12	1.79	1.91e-07
G1780	hypothetical protein	[]	2.67	3.5e-07	1.98	9.14e-06
G4595	hypothetical protein	[]	2.66	2.71e-28	2.77	4.11e-15
G1351	hypothetical protein	[]	2.65	7.62e-11	2.14	2.82e-12
G4830	ompA family protein	M	2.65	1.89e-15	1.39	0.000156
G4849	succinate-semialdehyde dehydrogenase family protein	C	2.6	1.46e-19	2.49	1.78e-20
G6034	META domain protein	O	2.6	1.8e-23	2.65	1.91e-24
G1084	hypothetical protein	[]	2.59	5.28e-05	2.43	0.000119
G1502	hypothetical protein	[]	2.5	0.00373	2	0.00488
G1046	mechanosensitive ion channel family protein	M	2.48	6.32e-24	1.86	9.39e-12
G4216	bacterial regulatory s, tetR family protein	K	2.47	2.46e-17	1.93	4.14e-09
G5706	ahpC/TSA family protein	O	2.46	1.18e-23	2.14	7.14e-10
G5516	short chain dehydrogenase family protein	I	2.43	4.85e-11	2.03	9.34e-09
G4927	acyl-CoA dehydrogenase, C-terminal domain protein	I	2.43	4.97e-12	1.86	3.55e-10
G5270	acyl-CoA dehydrogenase, N-terminal domain protein	I	2.43	1.07e-18	2.44	1.55e-12
G1258	transglycosylase SLT domain protein	M	2.4	1.31e-25	2.16	3.3e-18
acnA	aconitate hydratase 1	C	2.38	6.52e-19	1.45	4.78e-06
cpo	chloride peroxidase	S	2.38	1.58e-11	1.91	5.16e-09
tusD	dsrE/DsrF-like family protein	P	2.38	2.26e-15	1.52	0.000101
G5341	hypothetical protein	[]	2.37	9.28e-15	1.94	1.41e-10
G5326	hypothetical protein	[]	2.37	4.44e-16	2.23	7.76e-13
G5457	hypothetical protein	[]	2.33	1.21e-07	1.66	0.00724
G3683	OmpW family protein	M	2.33	1.42e-08	2.51	1.31e-11
G4614	hypothetical protein	[]	2.32	4.04e-06	2.49	0.000142
G850	acyl-CoA dehydrogenase, N-terminal domain protein	I	2.29	7.69e-23	2.05	3.6e-13
G4731	hypothetical protein	S	2.27	2.7e-10	1.84	6.4e-09
G4316	transglycosylase associated family protein	S	2.24	1.86e-11	1.61	0.00157
G1592	hypothetical protein	[]	2.24	1.97e-14	2.4	1.38e-05
G4866	oxidoreductase, short chain dehydrogenase/reductase family	S	2.23	2.85e-07	1.38	0.00749
G1227	liporeleasing system, transmembrane , LolC/E family protein	M	2.23	8.02e-22	2.72	4.35e-25
G4562	hypothetical protein	S	2.22	6.48e-14	1.26	0.0081
G1906	flavin oxidoreductase / NADH oxidase family protein	C	2.22	1.52e-07	1.79	5.71e-07
G4000	entericidin EcnA/B family protein	[]	2.16	2.36e-08	1.87	0.000737
G724	glcNAc-PI de-N-acetylase family protein	S	2.15	5.17e-09	1.24	0.00412
G639	hemerythrin HHE cation binding domain protein	S	2.15	8.11e-16	1.84	4.59e-10
lolD	liporeleasing system, ATP-binding protein	V	2.14	2.04e-16	2.54	5.35e-14
G4177	mce related family protein	Q	2.14	1.49e-16	2.61	1.55e-18
G1680	peptidase M15 family protein	S	2.13	5.74e-15	2.4	1.33e-18
G5148	patatin-like phospholipase family protein	T	2.13	5.74e-14	2.14	4.14e-09
G4793	response regulator	T	2.12	2.67e-14	2.22	4e-15
rstA	two-component system response regulator protein	T	2.12	8.02e-17	1.63	9.83e-09
LYS1	saccharopine dehydrogenase	S	2.09	1.11e-12	1.63	4.14e-06
G1546	efflux transporter, RND family, MFP subunit	M	2.08	1.05e-13	2	4.93e-07
G669	major Facilitator Superfamily protein	G	2.08	6.96e-16	1.76	1.21e-10
G4305	hypothetical protein	[]	2.05	3.92e-14	2.38	5.02e-11
nadC	nicotinate-nucleotide diphosphorylase	H	2.04	3.38e-16	2.4	1.61e-11
fumC	fumarate hydratase, class II	C	2.04	1.42e-12	1.35	1.31e-07
G4821	short chain dehydrogenase family protein	M	2.04	1.21e-12	1.43	2.69e-07
G4463	efflux pump membrane family protein	V	2.02	7.52e-17	2.28	1.16e-14
G310	repair family protein	S	2.02	6.3e-15	1.34	1.68e-05
G5562	flavin oxidoreductase / NADH oxidase family protein	C	2.01	2.16e-12	1.94	3.25e-11
G3674	LysR substrate binding domain protein	K	2	1.25e-14	1.48	0.00154
G4673	efflux transporter, RND family, MFP subunit	V	1.99	2.35e-12	1.65	9.14e-08
G753	catalase family protein	P	1.94	1.41e-09	1.84	2.83e-11
G4309	nitroreductase family protein	S	1.93	7.84e-09	1.79	3.9e-07
gabT	4-aminobutyrate transaminase	E	1.91	4.95e-09	2.33	2.68e-13
G1376	hypothetical protein	[]	1.91	3.25e-10	1.8	1.67e-05
G785	acrB/AcrD/AcrF family protein	P	1.91	6.75e-14	1.65	0.000122
G5536	hypothetical protein	[]	1.91	3.96e-12	1.81	1.18e-05
pal	peptidoglycan-associated lipoprotein	M	1.9	1.74e-15	1.62	0.000366
G1671	hypothetical protein	[]	1.89	6.01e-10	2.24	8.13e-05
G1472	acetyltransferase domain protein	S	1.88	4.24e-06	1.41	0.000834
G4442	BON domain protein	S	1.88	5.4e-14	1.72	1.26e-09
mro	aldose 1-epimerase	G	1.86	3.59e-11	1.5	1.14e-05
G1695	hypothetical protein	S	1.85	1.83e-10	1.05	0.00119
drgA	protein drgA	C	1.85	1.04e-14	1.75	2.39e-08
sppA	signal peptide peptidase SppA, 36K type	O	1.84	2.25e-14	1.66	9.14e-08
fadH	flavin oxidoreductase / NADH oxidase family protein	C	1.82	1.75e-10	1.54	7.05e-07
G5687	hypothetical protein	[]	1.82	1.37e-12	1.33	6.32e-06
G1898	N-terminal domain of DJ-1_PfpI family protein	S	1.81	8.59e-10	1.63	5.54e-06
G4892	putative enoyl-CoA hydratase/isomerase	I	1.79	9.38e-09	1.12	0.00526
fadA	acetyl-CoA C-acyltransferase FadA	I	1.79	3.35e-08	1.74	2.04e-08
G1212	bacterial extracellular solute-binding s, 3 family protein	M	1.79	5.55e-07	2.5	7.05e-17
G5691	hypothetical protein	[]	1.79	3.48e-08	1.77	8.92e-06
G1897	transcriptional regulator family protein	K	1.79	1.24e-08	1.21	0.00401
G470	peptidase inhibitor I78 family protein	S	1.78	8.68e-11	1.3	0.00515
tolB	tol-Pal system beta propeller repeat protein TolB	U	1.76	2.75e-12	1.76	8.54e-11
G4805	hypothetical protein	[]	1.74	1.39e-12	1.89	2.34e-07
G4026	H antiporter-2 family protein	P	1.73	9.04e-09	2.15	2.22e-13
G5747	aldo/keto reductase family protein	C	1.73	2.76e-12	1.48	9.58e-08
acrA	acriflavine resistance protein A	V	1.7	5.59e-10	2.06	2.15e-11
G4294	lysM domain protein	M	1.69	1.25e-10	1.63	9.51e-07
G1667	dienelactone hydrolase family protein	S	1.69	1.25e-07	1.95	1.41e-10
G5404	acyl-CoA dehydrogenase, N-terminal domain protein	I	1.68	6.22e-13	1.51	2.64e-07
catB	muconate and chloromuconate cycloisomerases family protein	Q	1.66	6.16e-08	1.35	9.3e-05
fadB	fatty oxidation complex, alpha subunit FadB	I	1.65	6.85e-10	1.52	7.75e-06
G963	putative membrane protein	G	1.64	9.82e-05	1.57	0.000156
G5645	ahpC/TSA family protein	O	1.62	4.71e-09	1.28	9.94e-05
gdhB	quinoprotein glucose dehydrogenase B	G	1.62	3.65e-08	1.07	0.000385
G5650	thioredoxin family protein	O	1.61	5.08e-09	1.45	3.67e-06
bpeB	RND transporter, hydrophobe/amphiphile efflux-1 family protein	V	1.6	1.68e-09	1.98	9.38e-08
G5296	zinc-binding dehydrogenase family protein	E	1.6	9.5e-06	1.08	0.00409
G1772	acetyl-CoA C-acetyltransferase family protein	I	1.6	6.44e-08	1.82	2.05e-06
add	adenosine deaminase	F	1.59	8.49e-07	1.69	1.77e-05
G754	hypothetical protein	[]	1.58	0.000429	1.32	9.75e-05
G4647	6-pyruvoyl tetrahydropterin synthase family protein	H	1.58	5.33e-10	1.56	3.39e-07
G6047	flavin oxidoreductase / NADH oxidase family protein	C	1.58	0.000127	1.41	0.00309
G2078	MATE efflux family protein	V	1.58	1.12e-08	1.91	4.37e-12
G4725	C-terminal processing peptidase family protein	M	1.55	5.46e-11	1.63	1.51e-10
G1634	transglycosylase SLT domain protein	M	1.55	3.1e-09	2	5.71e-07
G4462	hypothetical protein	[]	1.55	5.41e-08	2.06	0.000159
G4890	nitroreductase family protein	C	1.55	9.81e-11	1.41	4.02e-08
G1291	hypothetical protein	[]	1.55	1.79e-09	1.25	1.38e-05
G4129	lipocalin-like domain protein	M	1.54	9.8e-10	1.4	5.5e-06
manB	phosphoglucomutase/phosphomannomutase, C-terminal domain protein	G	1.54	2.24e-11	1.62	3.33e-07
tolA	protein TolA	M	1.54	2.24e-09	1.58	2.43e-08
G4148	NAD-dependent glycerol-3-phosphate dehydrogenase family protein	C	1.53	4.72e-10	1.24	2.04e-05
ethA	FAD-containing monooxygenase EthA	P	1.53	2.42e-10	1.82	8.99e-10
G3074	hypothetical protein	[]	1.53	2.29e-05	1.28	0.00162
G664	HAMP domain protein	T	1.53	1.54e-10	1.25	5.59e-06
G5882	NADPH-dependent FMN reductase family protein	S	1.53	6.26e-10	1.27	1.28e-05
G4913	ABC1 family protein	S	1.49	3.02e-08	1.53	2.82e-07
G3402	hypothetical protein	[]	1.49	2.89e-05	1.28	0.000338
htpG	histidine kinase-, DNA gyrase B-, and HSP90-like ATPase family protein	O	1.49	3.27e-05	1.34	8.91e-05
G3590	monooxygenase, flavin-binding family	P	1.48	2.77e-05	1.42	0.00782
tal	transaldolase	G	1.48	4.88e-10	1.3	6.99e-07
G5000	hypothetical protein	S	1.47	2.47e-08	1.49	2.32e-06
G3073	hypothetical protein	[]	1.44	6.18e-06	1.15	0.00512
G5673	hypothetical protein	S	1.43	1e-08	1.37	9.3e-07
tolQ	protein TolQ	U	1.43	1.32e-09	1.72	5.33e-09
G4123	polyketide cyclase / dehydrase and lipid transport family protein	S	1.43	1.17e-06	1.75	2.43e-08
G2059	PAP2 superfamily protein	I	1.42	4.81e-06	1.72	7.99e-10
G1333	cation efflux family protein	P	1.42	3.33e-07	1.06	0.00143
G417	META domain protein	[]	1.41	2.06e-08	1.44	3.88e-05
G4677	alpha/beta hydrolase family protein	S	1.4	3.22e-08	1.41	1.45e-06
G3248	beta-lactamase family protein	V	1.39	4.46e-08	1.03	0.000208
ndh	pyridine nucleotide-disulfide oxidoreductase family protein	C	1.38	7.04e-08	1.24	7.57e-06
G5823	PPIC-type PPIASE domain protein	O	1.37	1.8e-08	1.44	4.29e-08
G5136	FAD binding domain protein	H	1.36	8.26e-07	1.4	2.43e-06
G1147	hypothetical protein	S	1.35	1.61e-08	1.06	0.000106
G1294	hypothetical protein	[]	1.34	5.94e-05	1.56	1.71e-05
G5592	peptidase M48 family protein	O	1.34	3.44e-07	1.66	2.44e-09
G340	ecsC family protein	[]	1.34	1.5e-08	1.06	7.8e-05
oprM	efflux transporter, outer membrane factor (OMF) lipo, NodT family protein	M	1.34	6.44e-08	1.68	1.55e-07
sodC	superoxide dismutase domain protein	P	1.32	9.34e-08	1.61	7.95e-07
groL	chaperonin GroL	O	1.31	4.41e-06	1.39	1.35e-05
G3919	putative excinuclease ABC, A subunit	L	1.3	0.000222	1.06	0.00472
G5640	hypothetical protein	[]	1.3	0.000128	1.08	0.00547
G4527	putative enoyl-CoA hydratase/isomerase	I	1.3	3.64e-07	1.14	0.000149
G4899	RND transporter, hydrophobe/amphiphile efflux-1 family protein	P	1.3	1.09e-07	1.63	4.77e-08
G3403	hypothetical protein	[]	1.29	0.00014	1.17	0.00215
G4774	phosphoglucomutase/phosphomannomutase, C-terminal domain protein	G	1.29	8.67e-08	1.35	2.76e-06
G1771	maoC like domain protein	I	1.28	1.54e-06	1.05	0.000264
ung	uracil-DNA glycosylase	L	1.28	7.89e-07	1.06	0.000555
vdh	vanillin dehydrogenase	C	1.26	0.00511	1.34	9.9e-05
G1770	lactonase, 7-bladed beta-propeller family protein	G	1.26	1.64e-05	1.14	0.000432
G1297	hypothetical protein	[]	1.25	1.21e-05	1.22	0.0021
uvrA	excinuclease ABC subunit A	L	1.25	9.04e-08	1.01	0.000131
G4824	isocitrate lyase	C	1.24	0.00136	1.19	5.63e-05
tolR	protein TolR	U	1.23	1.89e-06	1.59	2.05e-06
sodB	superoxide dismutase	P	1.22	3.07e-06	1.01	0.00319
ihfB	integration host factor, beta subunit	K	1.21	3.69e-07	1.04	0.000225
katG	catalase/peroxidase HPI	P	1.21	7.04e-05	1.07	0.000628
G4023	hypothetical protein	[]	1.21	4.88e-06	1.15	0.000171
G1416	putative monooxygenase	P	1.2	0.00113	1.2	0.00154
G4740	lytic murein transglycosylase family protein	M	1.2	1.21e-05	1.54	2.44e-09
G4291	hypothetical protein	[]	1.2	1.12e-05	1.33	0.00976
G5622	enoyl-CoA hydratase/isomerase family protein	I	1.2	1.98e-05	1.27	2.14e-05
G680	histidine phosphatase super family protein	T	1.18	0.000112	1.36	9.28e-05
G4057	nitroreductase family protein	C	1.18	1.12e-05	1.1	0.00288
G4881	efflux transporter, RND family, MFP subunit	M	1.18	2.42e-06	1.4	3.49e-05
ahpC	peroxiredoxin	O	1.17	2.12e-06	1.24	0.000992
fbp	FKBP-type peptidyl-prolyl cis-trans isomerase family protein	O	1.17	0.000182	1.37	0.000136
G3888	acyl-CoA dehydrogenase, C-terminal domain protein	I	1.16	0.00144	1.02	0.0027
G1529	hypothetical protein	[]	1.16	7.02e-06	1.07	0.000347
mfd	transcription-repair coupling factor	L	1.15	3.53e-06	1.04	0.000146
G1767	conserved region in glutamate synthase family protein	E	1.15	3.19e-05	1.27	3.66e-06
G1232	RNA polymerase sigma factor, sigma-70 family protein	K	1.15	4.67e-06	1.06	0.00046
G1833	hypothetical protein	O	1.15	0.000142	1.23	0.000251
sucB	dihydrolipoyllysine-residue succinyltransferase	C	1.15	7.76e-07	1.26	2.04e-05
G567	AMP-binding enzyme family protein	I	1.14	1.49e-05	1.44	5.59e-07
fba	fructose-bisphosphate aldolase, class II, Calvin cycle subtype	G	1.13	1.23e-06	1.24	4.04e-06
G1116	glucose / Sorbosone dehydrogenase family protein	G	1.12	0.000548	1.03	0.000836
G5230	mycolic acid cyclopropane synthetase family protein	S	1.12	3.67e-05	1.02	0.000726
xpt	xanthine phosphoribosyltransferase	F	1.11	2.5e-06	1.55	4.72e-08
G4364	hypothetical protein	[]	1.1	1.1e-05	1.08	0.000646
G5043	tetratricopeptide repeat family protein	[]	1.1	1.19e-05	1.06	0.000186
G1231	hypothetical protein	[]	1.1	1.03e-05	1.01	0.00333
edd	phosphogluconate dehydratase	G	1.09	2.11e-05	1.28	6.39e-05
pgpA	phosphatidylglycerophosphatase A	I	1.09	8.91e-06	1.39	1.41e-05
htpX	peptidase M48 family protein	O	1.08	4.25e-05	1.1	6.59e-05
G5329	short chain dehydrogenase family protein	S	1.07	0.000668	1.32	2.92e-05
G1048	alpha/beta hydrolase family protein	[]	1.07	4.25e-05	1.03	0.000997
pqqC	coenzyme PQQ biosynthesis protein C	H	1.07	5.23e-05	1.14	0.000111
argB	acetylglutamate kinase	E	1.07	0.000504	1.03	0.00081
G1257	ribonuclease T2 family protein	J	1.06	2.43e-05	1.12	2.03e-05
G5864	glutathione S-transferase, C-terminal domain protein	O	1.05	7.9e-05	1.13	0.000138
glmU	UDP-N-acetylglucosamine diphosphorylase/glucosamine-1-phosphate N-acetyltransferase	M	1.05	3.27e-05	1.2	3.7e-06
G5638	hypothetical protein	[]	1.04	2e-05	1	0.00298
etfA	electron transfer flavoFAD-binding domain protein	C	1.04	3.07e-05	1.34	2.63e-07
G1290	methyltransferase domain protein	Q	1.03	0.000569	1.02	0.000542
yaeT	outer membrane assembly complex, YaeT protein	M	1.02	2.73e-05	1.19	1.86e-05
G1571	hypothetical protein	[]	1.01	0.000141	1.1	0.00923
groS	10 kDa chaperonin	O	1.01	0.00297	1.04	0.0038
G4634	hypothetical protein	[]	1	0.000668	1.24	7.28e-05
G5384	dihydrolipoyl dehydrogenase	C	1	0.000507	1.15	0.000275
G2847	acetyltransferase family protein	S	-1.01	0.00949	-1.19	0.00547
G3749	hypothetical protein	[]	-1.01	0.00282	-1.07	0.00408
G517	fimbrial family protein	N	-1.02	0.00108	-1.97	4.13e-13
G1211	transglycosylase SLT domain protein	M	-1.03	0.000493	-1.3	7.21e-06
G355	hypothetical protein	[]	-1.03	0.00677	-1.81	6.62e-06
G3922	hypothetical protein	[]	-1.05	0.00033	-1.07	0.00265
G4884	fatty acid desaturase family protein	I	-1.06	0.000636	-1.99	3.47e-13
G4867	type IV pilus assembly PilM family protein	N	-1.08	0.00024	-1.64	1.01e-06
G5253	endoribonuclease L-PSP family protein	J	-1.08	4.38e-05	-1.56	6.02e-05
G5546	A circularly permuted ATPgrasp family protein	S	-1.09	0.00705	-1.03	0.00093
G1885	lemA family protein	S	-1.1	0.000274	-1.53	3.37e-05
bioA	adenosylmethionine-8-amino-7-oxononanoate transaminase	H	-1.11	0.000161	-1.28	9.9e-05
G5626	bacterial regulatory helix-turn-helix s, AraC family protein	K	-1.12	0.000891	-1.15	0.000207
G3466	hypothetical protein	[]	-1.12	0.00216	-1.13	0.00512
G2389	hypothetical protein	[]	-1.13	0.000329	-1.61	2.73e-06
G2681	hypothetical protein	S	-1.13	0.00593	-1.73	9.4e-07
G4064	oxidoreductase NAD-binding domain protein	C	-1.14	0.00318	-2.32	1.72e-15
G1741	hypothetical protein	S	-1.15	0.00151	-1.08	0.00532
G3642	hypothetical protein	[]	-1.16	4.53e-05	-1.26	1.32e-06
G3908	hypothetical protein	S	-1.16	9.92e-05	-1.25	1.71e-06
G5862	formylglycine-generating sulfatase enzyme family protein	S	-1.18	0.0027	-1.15	0.00546
G3626	hypothetical protein	[]	-1.18	0.00011	-1.17	8.42e-05
G3641	prevent-host-death family protein	[]	-1.19	1.03e-05	-1.21	0.000154
G2895	bacterial SH3 domain protein	[]	-1.19	0.00197	-1.6	8.96e-06
G3477	resolvase, N-terminal domain protein	L	-1.21	7.44e-06	-1.06	0.00128
G1402	hypothetical protein	S	-1.21	0.00307	-1.64	0.000234
G3640	hypothetical protein	S	-1.22	6.64e-05	-1.36	1.16e-05
G3917	hypothetical protein	[]	-1.23	0.0072	-1.39	0.00016
hyuE	asp/Glu/Hydantoin racemase family protein	E	-1.24	0.00447	-1.31	0.00385
G3558	D-serine/D-alanine/glycine transporter	E	-1.24	0.000344	-1.07	0.00188
G3964	hypothetical protein	[]	-1.25	1.41e-05	-1.2	0.000506
bioC	methyltransferase domain protein	I	-1.26	4.25e-05	-1.12	0.000992
G4281	acyltransferase family protein	I	-1.29	0.000342	-1.66	3.25e-06
fabB	beta-ketoacyl synthase, C-terminal domain protein	I	-1.29	1.49e-05	-1.39	2.19e-07
G3631	outer membrane protein transport protein, Ompp1/FadL/TodX family	I	-1.31	6.74e-08	-1.51	2.46e-05
gltI	bacterial extracellular solute-binding s, 3 family protein	P	-1.32	0.000581	-1.44	0.00638
G613	putative membrane protein	[]	-1.34	0.00162	-1.81	1.38e-05
G3671	DnaJ domain protein	O	-1.34	0.00137	-1.41	2.34e-05
G1468	sirA-like family protein	[]	-1.34	1.95e-05	-1.13	0.000136
G3808	hypothetical protein	[]	-1.35	0.00116	-1.7	2.33e-07
fabZ	beta-hydroxyacyl-(acyl-carrier-protein) dehydratase FabZ	I	-1.35	5.78e-08	-1.22	2.93e-05
G1953	amino ABC transporter, permease , 3-TM region, His/Glu/Gln/Arg/opine family domain protein	P	-1.35	0.000179	-1.49	0.00547
bioF	aminotransferase class I and II family protein	H	-1.36	2.23e-07	-1.47	3.66e-06
G1429	spore Coat Protein U domain protein	S	-1.36	5.53e-07	-1.17	0.000865
G4422	hypothetical protein	S	-1.38	0.000221	-1.92	0.000519
accD	acetyl-CoA carboxylase, carboxyl transferase, beta subunit	I	-1.39	1.55e-09	-1.27	0.000299
G1430	spore Coat Protein U domain protein	[]	-1.4	4.12e-08	-1.12	0.00394
bioB	biotin synthase	H	-1.41	2.37e-09	-1.25	3.41e-05
G3902	hypothetical protein	[]	-1.42	4.81e-05	-1.19	0.000401
G1675	hypothetical protein	S	-1.43	0.000265	-1.52	0.00103
G5115	lysE type translocator family protein	E	-1.44	6.48e-05	-1.43	0.000201
G1965	bacterial regulatory s, tetR family protein	K	-1.45	0.00832	-1.8	0.000401
G5002	hypothetical protein	[]	-1.47	3.06e-05	-1.37	8.17e-07
fabI	enoyl-[acyl-carrier-protein] reductase [NADH] FabI	I	-1.49	5.26e-09	-1.25	3.49e-05
G4808	porin subfamily protein	[]	-1.49	3.17e-09	-1.64	2.78e-06
G5215	hypothetical protein	[]	-1.5	1.12e-07	-1.37	2.61e-06
G1860	hxlR-like helix-turn-helix family protein	K	-1.53	0.00645	-1.72	0.00348
G1431	bacterial regulatory s, tetR family protein	K	-1.56	1.29e-07	-1.09	0.00389
G1662	hypothetical protein	[]	-1.57	0.000903	-1.69	9.54e-05
G5150	porin B	M	-1.58	2.04e-11	-1.97	1.91e-08
G1623	hypothetical protein	[]	-1.61	9.8e-10	-1.47	6.05e-05
G3623	hypothetical protein	[]	-1.61	1.16e-05	-2.54	4.22e-12
G3546	putative bacterial lipoprotein (DUF799)	S	-1.62	6.86e-07	-2.09	3.66e-06
G320	pyridine nucleotide-disulfide oxidoreductase family protein	S	-1.62	3.75e-08	-1.47	1.25e-06
actP	sodium symporter family protein	S	-1.63	0.000111	-1.87	0.00907
G3893	hypothetical protein	S	-1.64	0.000145	-1.67	1.03e-05
G3809	hypothetical protein	[]	-1.65	0.000781	-2	7.57e-08
G3634	hypothetical protein	[]	-1.67	0.000583	-1.25	0.00783
tilS	tRNA(Ile)-lysidine synthetase	D	-1.7	5.61e-09	-1.32	3.61e-06
accC	acetyl-CoA carboxylase, biotin carboxylase subunit	I	-1.85	1.24e-13	-1.54	0.000108
G3545	hypothetical protein	S	-1.86	9.61e-08	-2.36	1.24e-08
G1432	bacterial regulatory s, gntR family protein	K	-1.87	2.36e-12	-1.13	0.000992
G3910	hypothetical protein	[]	-1.87	8.79e-07	-1.61	1.86e-05
G284	filamentous hemagglutinin family N-terminal domain protein	U	-1.89	0.000562	-2.54	4.35e-16
fabG	3-oxoacyl-[acyl-carrier-protein] reductase	I	-1.9	5.34e-15	-1.65	2.03e-07
accB	acetyl-CoA carboxylase, biotin carboxyl carrier protein	I	-1.91	4.11e-13	-1.73	2.66e-08
G3921	fimbrial protein	N	-1.93	4.26e-12	-1.64	0.000196
iVD	acyl-CoA dehydrogenase, N-terminal domain protein	I	-1.94	0.00796	-2.36	0.00508
G3675	hypothetical protein	H	-1.95	7.72e-10	-1.66	7.57e-06
accA	acetyl-CoA carboxylase, carboxyl transferase, alpha subunit	I	-1.95	1.73e-09	-1.68	3.08e-10
fabD	malonyl CoA-acyl carrier protein transacylase	I	-1.97	4.56e-18	-1.72	4.7e-07
G1302	fimbrial assembly family protein	U	-2	0.00177	-1.48	0.00871
G3544	curli production assembly/transport component CsgG	M	-2.01	2.02e-10	-2.5	3.98e-14
G515	bacterial regulatory s, tetR family protein	K	-2.07	0.00154	-2.02	4.34e-05
G5730	homocysteine S-methyltransferase family protein	E	-2.08	3.98e-14	-1.04	0.00211
G1570	4-phosphopantetheinyl transferase superfamily protein	H	-2.13	2.52e-12	-1.17	0.00193
G3901	hypothetical protein	[]	-2.17	2.32e-09	-2.34	1.35e-10
G1289	hypothetical protein	[]	-2.18	2.42e-13	-1.85	8.8e-09
G1793	hypothetical protein	[]	-2.23	7.32e-16	-1.42	8.62e-05
G4902	amino acid permease family protein	E	-2.23	4.7e-19	-2.02	1.36e-05
G1792	putative membrane protein	[]	-2.27	2.88e-14	-1.5	1.99e-05
G1080	gram-negative pili assembly chaperone, C-terminal domain protein	N	-2.38	1.45e-21	-2.49	6.4e-07
G1958	type VII secretion system (T7SS), usher family protein	M	-2.51	8.18e-21	-2.08	5.71e-07
G1666	hypothetical protein	[]	-2.58	2.4e-14	-2.48	3.83e-10
G3624	hypothetical protein	[]	-2.61	0.00429	-2.53	2.02e-07
aroQ	3-dehydroquinate dehydratase, type II	E	-2.64	4.74e-21	-1.82	5.75e-07
G1870	surface antigen family protein	U	-2.9	5.47e-09	-3.48	1.24e-30
G1083	hypothetical protein	[]	-3.41	1.57e-12	-2.5	4.02e-08
G1923	hypothetical protein	[]	-4.56	9.8e-06	-2.24	0.00528
COG*: [] in this column means this gene was not anntated into any COG category.

## Sheet: Table S5
Table S5. Unique DEGs from samples treated with 2 mg/L colistin at 15 min
Gene	Annotation	COG*	logFC	FDR
G946	hypothetical protein	L	3.03	2.07e-05
G3487	toxin-antitoxin system, antitoxin component, AbrB domain protein	[]	2.65	0.00187
G2759	hypothetical protein	S	2.53	8.27e-19
G1435	bacterial OB fold family protein	S	2.52	7.24e-08
G3494	replication protein C (RepC)	K	2.49	0.00064
G1875	hypothetical protein	S	2.48	4.52e-13
G1501	stress-induced bacterial acidophilic repeat motif family protein	[]	2.43	0.00615
G5720	conserved TM helix family protein	E	2.28	1.89e-15
G4082	hypothetical protein	S	2.18	9.8e-10
G5652	hypothetical protein	Q	2.12	2.57e-17
G4207	hypothetical protein	V	2	7.91e-05
G2669	hypothetical protein	P	1.99	8.05e-09
G1299	repair family protein	E	1.91	4.86e-09
G4546	3-demethylubiquinone-9 3-methyltransferase family protein	[]	1.81	6.66e-09
G5564	methyltransferase domain protein	P	1.79	3.64e-05
G1436	putative acyl-CoA dehydrogenase	U	1.76	4.96e-06
G4439	hypothetical protein	S	1.76	2.9e-08
G2888	putative coat protein	S	1.74	0.000151
G1200	putative selenocysteine synthase	U	1.73	1.86e-13
G2002	hypothetical protein	S	1.72	0.00285
G4525	lemA family protein	O	1.72	1.57e-12
G3485	low molecular weight phosphotyrosine protein phosphatase	G	1.72	0.00304
G3433	hypothetical protein	H	1.66	1.61e-05
G3985	merR HTH regulatory family protein	[]	1.66	9.8e-10
G3589	oxidoreductase, short chain dehydrogenase/reductase family protein	S	1.65	0.000494
ihfA	integration host factor, alpha subunit	E	1.64	8.71e-07
G2214	hypothetical protein	S	1.58	1.2e-08
G502	hypothetical protein	M	1.58	2.91e-06
G2494	hypothetical protein	S	1.55	4.58e-05
G5321	molybdopterin dinucleotide binding domain protein	S	1.54	3.22e-10
tesA	esterase TesA	[]	1.52	1.08e-06
G722	glucose / Sorbosone dehydrogenase family protein	[]	1.51	5.03e-09
G2513	flavodoxin family protein	[]	1.49	0.00109
G4136	yceI-like domain protein	P	1.47	4.58e-08
G1849	putative metal-dependent hydrolase family protein	I	1.46	0.00207
G5632	dnaJ C terminal domain protein	K	1.46	5.29e-09
G690	acyl-CoA dehydrogenase, C-terminal domain protein	C	1.45	0.000247
G3405	hypothetical protein	S	1.44	0.000798
G1941	hypothetical protein	P	1.4	0.000118
G729	hypothetical protein	S	1.39	0.00223
G3730	hypothetical protein	P	1.37	0.000414
hemF	coproporphyrinogen III oxidase family protein	L	1.37	5.17e-05
G3498	hypothetical protein	[]	1.37	0.00664
G4477	hypothetical protein	Q	1.36	1.61e-08
G3711	hypothetical protein	[]	1.36	0.00106
G3432	hypothetical protein	T	1.35	2.52e-05
hfq	RNA chaperone Hfq	Q	1.34	0.000988
G1353	major Facilitator Superfamily protein	[]	1.34	4.31e-05
yjlD	pyridine nucleotide-disulfide oxidoreductase family protein	L	1.34	9e-05
miaA	tRNA dimethylallyltransferase	K	1.33	1.12e-07
G1811	efflux transporter, RND family, MFP subunit	S	1.33	0.000903
G4146	hypothetical protein	[]	1.32	0.00105
G1198	serine hydrolase family protein	O	1.32	0.000122
G5182	glycosyl transferase 2 family protein	T	1.32	0.00575
G3706	hypothetical protein	[]	1.31	0.000208
G3527	hypothetical protein	[]	1.31	0.00745
G1927	hypothetical protein	S	1.3	2.82e-05
G3431	hypothetical protein	[]	1.3	8.97e-05
G4087	hypothetical protein	[]	1.3	0.000129
G3724	hypothetical protein	[]	1.3	9.75e-06
G1126	hypothetical protein	[]	1.29	0.00383
G2495	hypothetical protein	S	1.28	3.38e-06
G1564	snoaL-like domain protein	[]	1.27	3.55e-06
G2229	hypothetical protein	[]	1.26	0.00226
G4782	ATP-NAD kinase family protein	S	1.26	1.02e-05
G5893	alpha/beta hydrolase fold family protein	S	1.26	9.32e-05
G5830	hypothetical protein	S	1.25	0.00182
G1735	hypothetical protein	[]	1.25	3.7e-07
G4237	acetyltransferase family protein	[]	1.24	3.47e-05
G1314	putative membrane protein	[]	1.24	2.86e-06
G1248	hypothetical protein	[]	1.23	0.000141
msrB	methionine-R-sulfoxide reductase	[]	1.23	5.78e-05
G3704	hypothetical protein	[]	1.23	0.00203
G3410	hypothetical protein	S	1.23	0.000562
G3705	hypothetical protein	K	1.23	0.0066
G1928	hypothetical protein	K	1.22	9.03e-06
G3725	hypothetical protein	I	1.22	0.00014
G805	hypothetical protein	G	1.22	0.00159
G1174	endonuclease/Exonuclease/phosphatase family protein	L	1.21	4.31e-05
G261	putative tail fiber	H	1.21	1.51e-05
G3726	hypothetical protein	[]	1.2	0.000237
G1709	metallo-beta-lactamase superfamily protein	[]	1.2	0.00125
G3729	hypothetical protein	[]	1.19	0.00364
blaOXA-33	beta-lactamase	S	1.19	9.94e-05
G935	hypothetical protein	[]	1.18	0.00766
G3709	hypothetical protein	K	1.17	0.00269
G3723	phage protein F-like protein	O	1.17	1.41e-05
G3650	cation efflux system protein CzcA	K	1.16	0.000164
mrcB	penicillin-binding protein 1B	[]	1.16	8.49e-07
G3428	hypothetical protein	S	1.14	9.94e-05
G5567	cobalamin-independent synthase, Catalytic domain protein	C	1.14	0.000591
G4769	enoyl-CoA hydratase/isomerase family protein	S	1.14	4.71e-05
G3727	hypothetical protein	[]	1.14	0.00278
G4835	malic enzyme, NAD binding domain protein	S	1.12	2.36e-06
pepD	xaa-His dipeptidase family protein	[]	1.11	0.000114
G4979	acyl-CoA dehydrogenase, C-terminal domain protein	S	1.11	0.00449
G195	hypothetical protein	T	1.1	0.000823
acnD	2-methylisocitrate dehydratase, Fe/S-dependent	T	1.1	0.00207
G1414	N-terminal domain of DJ-1_PfpI family protein	[]	1.08	0.00699
G1146	tatD related DNase family protein	J	1.08	0.000191
G4342	universal stress family protein	E	1.08	5.16e-05
dsdA	D-serine ammonia-lyase	S	1.06	0.00359
G929	xylose isomerase-like TIM barrel family protein	[]	1.05	5.27e-05
G4680	polyphosphate kinase 2 family protein	S	1.04	0.00016
glcB	malate synthase G	E	1.04	5.58e-05
G3429	hypothetical protein	[]	1.04	0.000681
G3430	putative DNA-binding protein Fis	C	1.04	0.00975
G3728	hypothetical protein	[]	1.04	0.00562
G5792	prolyl oligopeptidase family protein	M	1.04	7.34e-05
cadR	Cd(II)/Pb(II)-responsive transcriptional regulator	[]	1.04	0.0057
G5376	trypsin family protein	G	1.03	0.000223
G327	hypothetical protein	H	1.03	0.000582
G3591	transcriptional regulator, AraC family	J	1.03	0.0072
G3710	VRR-NUC domain protein	F	1.02	0.00952
nuoK	NADH-quinone oxidoreductase subunit K	E	1.02	4.46e-05
dapB	dihydrodipicolinate reductase	[]	1.01	0.000319
G3649	efflux transporter, RND family, MFP subunit	[]	1.01	0.00433
G3713	hypothetical protein	[]	1.01	0.00382
raiA	ribosomal subunit interface protein	E	1.01	0.000815
G3596	C-5 cytosine-specific DNA methylase	[]	1.01	0.00291
G5637	hypothetical protein	E	1.01	0.007
G5119	diguanylate cyclase domain protein	E	1	7.91e-05
hYR	ahpC/TSA family protein	S	1	0.000205
G1259	tonB family C-terminal domain protein	[]	-1	0.00168
cph2	response regulator	Q	-1.01	0.00612
csuC	gram-negative pili assembly chaperone, N-terminal domain protein	[]	-1.01	6.08e-05
rho	transcription termination factor Rho	[]	-1.01	9.42e-05
G3520	hypothetical protein	[]	-1.02	0.00142
G5292	sensors of blue-light using FAD family protein	[]	-1.02	0.00808
mdfA	multidrug transporter MdfA	[]	-1.02	0.000907
G3519	hypothetical protein	[]	-1.02	0.00418
G2051	hypothetical protein	[]	-1.03	0.000383
G4936	diguanylate cyclase domain protein	S	-1.03	0.000154
G4415	hypothetical protein	P	-1.04	0.00142
G4127	putative signal peptide containing protein	M	-1.04	0.000218
G1749	hypothetical protein	E	-1.05	0.00216
G3639	hypothetical protein	H	-1.05	0.0014
G3385	hypothetical protein	S	-1.07	0.000136
G3943	IstB-like ATP-binding protein	S	-1.07	0.00292
G3538	hypothetical protein	M	-1.07	0.000709
argT	lysine-arginine-ornithine-binding periplasmic family protein	S	-1.07	0.00381
hppD	4-hydroxyphenylpyruvate dioxygenase	S	-1.08	0.00138
hutG	formimidoylglutamase	[]	-1.08	0.00368
G4696	3,4-dihydroxy-2-butanone-4-phosphate synthase	N	-1.08	5.23e-05
cysT	sulfate ABC transporter, permease protein CysT	E	-1.09	0.00057
lpxA	acyl-[acyl-carrier-protein]-UDP-N-acetylglucosamine O-acyltransferase	G	-1.09	8.59e-06
G864	his Kinase A domain protein	[]	-1.09	7.87e-05
G522	chorismate binding enzyme family protein	S	-1.1	0.00374
G4473	phnA family protein	F	-1.1	0.00225
G4100	sulfate ABC transporter, sulfate-binding family protein	E	-1.1	0.000276
cycA	amino acid permease family protein	E	-1.1	4.54e-05
G5672	EAL domain protein	[]	-1.11	1.1e-05
G1280	hypothetical protein	J	-1.11	4.91e-05
prmB	protein-(glutamine-N5) methyltransferase, ribosomal protein L3-specific	T	-1.11	4.01e-05
acr1	fatty acyl-CoA reductase	E	-1.11	1.42e-05
G4195	AFG1-like ATPase family protein	[]	-1.12	1.45e-05
rnpA	ribonuclease P protein component	[]	-1.12	0.000249
G6018	AAA domain family protein	S	-1.12	0.000658
recO	DNA repair protein RecO	M	-1.12	1.65e-05
G1113	hypothetical protein	S	-1.12	0.000276
G1620	ribosomal L11 methyltransferase family protein	S	-1.12	4.43e-05
ybeY	putative rRNA maturation factor YbeY	T	-1.13	2.31e-06
G4020	hypothetical protein	J	-1.13	9.56e-05
tauA	taurine ABC transporter, periplasmic binding protein	P	-1.13	0.000221
G4273	hypothetical protein	C	-1.13	0.000734
G5825	eamA-like transporter family protein	G	-1.14	0.00328
G3644	hypothetical protein	V	-1.14	0.000614
G3963	hypothetical protein	E	-1.14	0.00379
dtd	D-tyrosyl-tRNA(Tyr) deacylase	[]	-1.15	3.68e-05
G1070	permease for cytosine/purine, uracil, thiamine, allantoin family protein	J	-1.15	0.00385
G3751	LysR substrate binding domain protein	K	-1.16	0.00277
pth	peptidyl-tRNA hydrolase	E	-1.16	3.07e-06
ansB	glutaminase-asparaginase	[]	-1.16	6.64e-05
G6059	amino ABC transporter, permease , 3-TM region, His/Glu/Gln/Arg/opine family domain protein	[]	-1.17	0.000546
G5852	hypothetical protein	I	-1.17	0.00251
gltK	amino ABC transporter, permease , 3-TM region, His/Glu/Gln/Arg/opine family domain protein	[]	-1.17	0.000447
G6051	xanthine permease family protein	T	-1.18	1.38e-05
G4333	hypothetical protein	J	-1.18	0.00129
G4928	amino acid permease family protein	[]	-1.18	3.45e-05
G2020	hypothetical protein	[]	-1.18	0.000349
G5046	alpha/beta hydrolase fold family protein	S	-1.2	1.01e-05
G4191	amino acid permease family protein	[]	-1.2	0.00304
G3738	phosphopantetheine--protein transferase domain protein	S	-1.2	0.000797
G780	hypothetical protein	I	-1.2	0.000307
bigR	bacterial regulatory , arsR family protein	I	-1.2	8.8e-05
G4119	putative membrane protein insertion efficiency factor	C	-1.2	1.89e-05
G4708	binding--dependent transport system inner membrane component family protein	S	-1.21	0.00441
G5701	hypothetical protein	S	-1.22	0.00101
glnQ	ABC transporter family protein	K	-1.22	0.000164
G3923	hypothetical protein	K	-1.22	0.000903
G3503	hypothetical protein	S	-1.23	6.3e-05
G5218	ABC transporter family protein	S	-1.23	0.00173
hutH	histidine ammonia-lyase	V	-1.25	3.07e-06
G1751	hypothetical protein	F	-1.26	0.000287
G3999	hypothetical protein	[]	-1.27	3.86e-05
G1730	putative membrane protein	L	-1.27	0.00307
rtcB	hypothetical protein	E	-1.27	1.31e-06
G1245	hypothetical protein	E	-1.28	2.33e-05
G3386	hypothetical protein	O	-1.28	0.000159
G2011	hypothetical protein	O	-1.29	0.00291
G1075	hypothetical protein	E	-1.29	0.000691
G584	phoD-like phosphatase family protein	P	-1.29	0.000536
G1624	bacterial regulatory helix-turn-helix s, AraC family protein	[]	-1.3	4.27e-08
G2877	hypothetical protein	S	-1.3	1.39e-06
G1403	hypothetical protein	E	-1.3	0.00474
G5905	proteobacterial lipase chaperone family protein	E	-1.3	0.00601
G4258	hypothetical protein	S	-1.31	0.000292
G3918	hypothetical protein	S	-1.32	0.00573
G966	methylenetetrahydrofolate reductase family protein	Q	-1.32	7.57e-06
lip	lactonizing lipase	P	-1.32	9.94e-05
G3646	hypothetical protein	[]	-1.32	0.00631
G1002	SMP-30/Gluconolaconase/LRE-like region family protein	S	-1.33	0.00661
prs	ribose-phosphate diphosphokinase family protein	[]	-1.34	5.04e-05
G3455	hypothetical protein	C	-1.36	0.00454
G4296	putative transposase	S	-1.36	0.00079
G3914	toxin-antitoxin system, toxin component, GNAT family	E	-1.37	0.00796
G957	hypothetical protein	[]	-1.39	0.00014
G1374	fhuF 2Fe-2S C-terminal domain protein	S	-1.39	0.00463
G3450	hypothetical protein	[]	-1.4	0.000175
lrp	asnC family protein	[]	-1.41	4.62e-06
G3505	hypothetical protein	[]	-1.42	1.24e-05
G5300	hypothetical protein	[]	-1.42	0.00125
G4510	hypothetical protein	C	-1.44	3.34e-07
G2377	3-oxoacid CoA-transferase, A subunit	T	-1.44	0.003
G5716	hypothetical protein	K	-1.45	6.59e-07
G3517	hypothetical protein	L	-1.47	0.00044
G1394	hypothetical protein	[]	-1.48	0.00122
G3899	hypothetical protein	[]	-1.49	0.00385
G4855	hypothetical protein	[]	-1.5	0.00101
G4736	hypothetical protein	S	-1.5	1.32e-09
dnaA	chromosomal replication initiator protein DnaA	[]	-1.52	1.67e-10
G3663	transcriptional regulator, TetR family	[]	-1.52	0.0045
G5917	hypothetical protein	[]	-1.54	9.92e-07
G2019	hypothetical protein	[]	-1.56	0.00731
G807	hypothetical protein	L	-1.57	0.000113
G5528	sulfite exporter TauE/SafE family protein	[]	-1.58	9.64e-11
G3911	indole acetimide hydrolase	[]	-1.59	3.79e-05
G5671	prepilin-type N-terminal cleavage/methylation domain protein	[]	-1.6	3.84e-06
G1303	sulfate ABC transporter, sulfate-binding family protein	K	-1.61	9.93e-06
G5725	lysE type translocator family protein	[]	-1.62	0.00103
G4246	pilus assembly , PilO family protein	[]	-1.63	0.00945
recX	recX family protein	S	-1.63	4.7e-06
proY	amino acid permease family protein	K	-1.67	8.51e-09
G2399	hypothetical protein	S	-1.7	2.19e-05
G5913	tonB domain protein	L	-1.73	1.01e-05
G1328	mycolic acid cyclopropane synthetase family protein	[]	-1.74	1.69e-10
arcD	transporter, basic amino acid/polyamine antiporter family protein	[]	-1.76	2.1e-11
G3622	hypothetical protein	[]	-1.8	0.00262
G1593	hypothetical protein	[]	-1.8	6.01e-05
G3658	HAD hydrolase, family IB	[]	-1.88	2.6e-09
rrtA	rhombosortase	K	-1.9	0.000303
G3793	hypothetical protein	S	-1.9	2.54e-06
G3742	hypothetical protein	[]	-1.91	0.00112
G1323	bacterial regulatory s, tetR family protein	S	-1.92	0.00456
G3794	hypothetical protein	J	-1.97	4.63e-05
G1207	hypothetical protein	F	-1.98	7.63e-07
G3811	hypothetical protein	P	-2	0.000656
G1508	hypothetical protein	S	-2.02	0.00785
G4800	hypothetical protein	S	-2.05	1.13e-08
G1206	hypothetical protein	S	-2.08	1.53e-08
G2793	isochorismatase	P	-2.27	0.00433
G1264	nitroreductase family protein	J	-2.33	1.42e-08
G3442	hypothetical protein	[]	-2.56	1.87e-05
COG*: [] in this column means this gene was not anntated into any COG category.

## Sheet: Table S6
Table S6. Unique DEGs from samples treated with 2 mg/L colistin at 60 min
Gene	Annotation	COG*	logFC	FDR
G3443	hypothetical protein	[]	3.02	0.000245
G3852	lipocalin-like protein	M	2.46	1.78e-07
G5794	amidase family protein	J	2.06	0.000152
G3866	spore Coat Protein U domain protein	S	1.97	0.000112
G855	hypothetical protein	[]	1.87	8.04e-09
psiE	phosphate-starvation-inducible E family protein	S	1.68	3.32e-06
G4402	ribosomal protein L31	J	1.47	0.000112
G1847	hypothetical protein	[]	1.46	1.39e-05
G965	putative oxidoreductase zinc-binding protein	C	1.41	8.42e-05
G5874	sel1 repeat family protein	S	1.39	0.000288
G1879	glutathione S-transferase, C-terminal domain protein	O	1.36	8.97e-06
minE	cell division topological specificity factor MinE	D	1.34	2.69e-07
glmS	glutamine-fructose-6-phosphate transaminase	M	1.31	1.01e-06
G4957	H-NS histone family protein	S	1.28	0.00223
kdsD	sugar isomerase, KpsF/GutQ family protein	M	1.26	5.29e-06
rpoH	alternative sigma factor RpoH	K	1.25	8.35e-06
yfiO	outer membrane assembly lipoYfiO family protein	M	1.24	3.28e-06
G721	sugar (and other) transporter family protein	G	1.24	0.00399
G5118	carboxymuconolactone decarboxylase family protein	S	1.23	0.00486
queC	queuosine biosynthesis protein QueC	S	1.23	0.000302
pqqD	coenzyme PQQ biosynthesis protein PqqD	H	1.21	0.000277
cyp18	peptidyl-prolyl cis-trans isomerase cyp18	O	1.21	0.000136
G3395	predicted Peptidoglycan domain protein	S	1.21	0.00703
dedA	protein dedA	P	1.17	0.000277
nadE	NAD synthetase	H	1.16	8.97e-06
G6057	S1 RNA binding domain protein	K	1.16	2.27e-05
kynU	kynureninase	E	1.15	0.00638
minD	septum site-determining protein MinD	D	1.13	1.24e-05
mpl	L-alanyl-gamma-D-glutamyl-meso-diaminopimelate ligase	M	1.12	5.27e-05
G4238	hypothetical protein	[]	1.12	0.00154
G835	calcineurin-like phosphoesterase family protein	F	1.11	0.00357
G5262	ostA-like family protein	M	1.1	7.61e-05
G1893	alpha/beta hydrolase fold family protein	I	1.1	0.000922
lgt	prolipoprotein diacylglyceryl transferase	M	1.1	0.000688
G4912	DSBA-like thioredoxin domain protein	O	1.1	0.000129
eda	2-dehydro-3-deoxyphosphogluconate aldolase/4-hydroxy-2-oxoglutarate aldolase family protein	G	1.1	0.00171
G4476	hypothetical protein	[]	1.08	0.0038
lon	ATP-dependent protease La	O	1.07	0.00152
ddc	L-2,4-diaminobutyrate decarboxylase	E	1.07	0.000903
kdsC	3-deoxy-D-manno-octulosonate 8-phosphate phosphatase, YrbI family protein	S	1.06	0.00045
G4335	patatin-like phospholipase family protein	T	1.05	0.000754
sucD	succinate-CoA ligase, alpha subunit	C	1.05	0.000495
G4943	H symporter family protein	E	1.05	0.000859
G4981	hypothetical protein	S	1.04	0.00631
G1903	hypothetical protein	[]	1.04	0.000363
G1199	DSBA-like thioredoxin domain protein	Q	1.04	0.000401
pqqE	coenzyme PQQ biosynthesis enzyme PqqE	H	1.04	0.00188
G1387	cytidine and deoxycytidylate deaminase zinc-binding region family protein	F	1.02	0.00106
G4156	ABC1 family protein	S	1.02	0.000202
clpA	ATP-dependent Clp protease ATP-binding subunit ClpA	O	1.01	0.000162
prlC	peptidase M3 family protein	E	1.01	0.00394
G3667	hypothetical protein	S	-1.01	0.00206
G3476	hypothetical protein	[]	-1.01	0.000801
G1648	putative metal-dependent hydrolase family protein	S	-1.02	0.00413
trpA	tryptophan synthase, alpha subunit	E	-1.02	0.000689
G3382	hypothetical protein	[]	-1.02	0.00258
G1263	bacterial regulatory helix-turn-helix s, AraC family protein	K	-1.02	0.00269
hcaR	hca operon transcriptional activator	K	-1.03	0.000395
G5241	outer membrane porin, OprD family protein	M	-1.03	0.00865
G4548	hypothetical protein	S	-1.03	0.00362
G3645	hypothetical protein	S	-1.05	0.00412
G2016	transposase DDE domain protein	L	-1.05	0.00114
G4256	hypothetical protein	[]	-1.05	0.00265
G4320	cation efflux family protein	P	-1.05	0.00152
pilB	type IV-A pilus assembly ATPase PilB	U	-1.06	0.00471
G961	alpha/beta hydrolase fold family protein	S	-1.06	0.00754
G4649	short chain dehydrogenase family protein	S	-1.08	0.00883
G5946	bacterial capsule synthesis PGA_cap family protein	M	-1.08	0.00216
G3625	type 1 secretion C-terminal target domain (VC_A0849 subclass)	Q	-1.09	0.000546
G3954	hypothetical protein	[]	-1.1	0.000345
G3788	hypothetical protein	[]	-1.11	0.000203
G1309	hypothetical protein	S	-1.11	0.000922
G3381	hypothetical protein	[]	-1.12	0.00093
G1320	putative restriction endonuclease PvuRts1I	[]	-1.12	0.00489
G1230	bacterial lipid A biosynthesis acyltransferase family protein	M	-1.12	9.8e-05
G3668	gammaproteobacterial enzyme transmembrane domain protein	E	-1.12	0.00219
G1020	tonB-dependent siderophore receptor family protein	P	-1.13	0.000257
G3611	hypothetical protein	[]	-1.13	0.00607
G3739	hypothetical protein	S	-1.14	0.000922
G3805	hypothetical protein	[]	-1.15	0.00128
proP	proline/betaine transporter	P	-1.15	0.00114
G3380	hypothetical protein	[]	-1.15	0.000112
G3475	hypothetical protein	[]	-1.16	0.00107
G6027	bacterial regulatory s, tetR family protein	K	-1.21	0.00027
G3383	hypothetical protein	[]	-1.24	0.00885
G3677	hypothetical protein	[]	-1.24	0.000275
G4011	putative membrane protein	[]	-1.24	0.000112
G2082	hypothetical protein	[]	-1.25	0.000827
G293	putative poly alpha-glucosyltransferase	M	-1.25	0.000859
G3909	hypothetical protein	[]	-1.25	7.28e-06
G1966	peptidase M48 family protein	O	-1.27	1.59e-05
G3806	hypothetical protein	S	-1.28	0.000252
G2653	tonB dependent receptor family protein	P	-1.29	1.6e-05
G3632	transcriptional regulator, HxlR family	K	-1.3	9.49e-05
G4882	aldehyde dehydrogenase family protein	C	-1.3	0.000626
G5238	alpha/beta hydrolase fold family protein	S	-1.31	0.000347
G2925	hypothetical protein	S	-1.32	0.000782
G5526	merR regulatory family protein	K	-1.32	0.00041
G3957	hypothetical protein	S	-1.36	9.49e-05
G3655	hypothetical protein	S	-1.39	1.02e-05
G3894	hypothetical protein	[]	-1.4	0.00344
G3540	Rhs element Vgr protein	S	-1.4	0.00114
pilG	response regulator	T	-1.42	4.18e-05
G3676	hypothetical protein	[]	-1.46	0.00256
benM	HTH-type transcriptional regulator BenM	K	-1.47	0.00171
G3915	hypothetical protein	[]	-1.48	0.00176
G3444	HAD hydrolase, family IA, variant 1	G	-1.48	0.000128
G3446	Rhs element Vgr protein	S	-1.49	3.24e-06
G3807	hypothetical protein	S	-1.5	8.64e-05
G3863	acetyltransferase, GNAT family	J	-1.51	9.9e-05
G879	fels-1 Prophage Protein-like family protein	S	-1.51	0.00359
G1887	his Kinase A domain protein	T	-1.53	1.95e-05
G3916	RNA 2-phosphotransferase, Tpt1/KptA family	J	-1.58	2.7e-05
G3927	hypothetical protein	[]	-1.58	0.00691
G3846	HD domain protein	S	-1.61	0.00298
G3829	hypothetical protein	[]	-1.62	4.91e-06
G985	hypothetical protein	[]	-1.63	0.000106
G1307	sel1 repeat family protein	S	-1.67	2.06e-05
G3810	hypothetical protein	[]	-1.7	2.42e-05
G3960	hypothetical protein	[]	-1.74	3.36e-06
paaC	phenylacetic acid degradation protein paaC	Q	-1.83	0.00412
G5243	bacterial regulatory s, tetR family protein	K	-1.89	1.05e-05
G3913	helicase C-terminal domain protein	V	-1.92	3.55e-10
G3507	hypothetical protein	[]	-1.93	4.59e-11
paaA	phenylacetic acid degradation protein paaA	Q	-1.96	0.0038
G4145	hypothetical protein	[]	-2.09	0.000306
G5962	lysE type translocator family protein	E	-2.21	0.00211
G1076	hypothetical protein	[]	-2.33	3.48e-06
G3654	putative membrane protein	E	-2.72	0.000285
G2837	hypothetical protein	[]	-3.61	0.00921
COG*: [] in this column means this gene was not anntated into any COG category.
